# Supplementary material
Source: PubMed Central journal article supplement (PMC3774305)
Supplement: NIHMS506098-supplement-SOM.pdf [file NIHMS506098-supplement-SOM.pdf]

**Supporting Online Material for**  
**School-Based Early Childhood Education and Age-28 Well-Being: Effects by**  
**Timing, Dosage, and Subgroups**

Arthur J. Reynolds,\* Judy A. Temple, Suh-Ruu Ou, Irma A. Arteaga, Barry A. B. White

\*To whom correspondence should be addressed. E-mail: [ajr@umn.edu](mailto:ajr@umn.edu)

**This PDF file includes:**

Materials and Methods  
Supporting Text  
References  
Tables S1 to S14  
Figs. S1 to S6

## Contents

|                                                          | Page |
|----------------------------------------------------------|------|
| 1. Materials and Methods.....                            | 4    |
| 1.1. Study Background.....                               | 4    |
| 1.2. Design and Study Sample.....                        | 4    |
| 1.3. Validity of CPC and Comparison Group Contrasts..... | 5    |
| 1.4. Adult Follow-up Sample and Group Comparability..... | 6    |
| 1.5. Child-Parent Center (CPC) Education Program.....    | 6    |
| 1.6. Outcome Measures.....                               | 8    |
| 1.7. Covariates.....                                     | 10   |
| 1.8. Analytic Strategy.....                              | 10   |
| 1.9. Background on Propensity Score Procedures.....      | 12   |
| 2. Supporting Text.....                                  | 15   |
| 2.1. Research Background.....                            | 15   |
| 2.2. Unadjusted Group Means and Differences.....         | 16   |
| 2.3. Additional Findings on Main Effects.....            | 16   |
| 2.4. Differences by Subgroup Characteristics.....        | 18   |
| 2.5. Robustness by Model Specification.....              | 19   |
| 2.6. Mediators of Effects on Well-Being.....             | 19   |
| 2.7. Findings in Context.....                            | 20   |
| 3. References.....                                       | 23   |
| 4. Supplementary Tables.....                             | 28   |
| 5. Supplementary Figures.....                            | 61   |

## Supplementary Tables

- S1a Patterns of Participation of Original Intervention and Comparison Groups in the CLS
- S1b Patterns of Participation of School-Age and Extended Intervention Groups in the CLS
- S2a Equivalence of CPC Preschool Intervention and Comparison Groups on Preprogram Attributes for the Age 28 Follow-up Study
- S2b Equivalence of CPC School-age Intervention and Comparison Groups on Preprogram Attributes for the Age 28 Follow-up Study
- S2c Equivalence of CPC Extended Intervention and Comparison Groups on Preprogram Attributes for the Age 28 Follow-up Study
- S3 Data Sources of Adult Outcomes by Age 28
- S4 Chicago Longitudinal Study Occupational Prestige Scale
- S5 Descriptive Statistics for Study Measures
- S6a Estimates of Sample Recovery for Three Outcomes
- S6b Estimates of Participation in the CPC Program
- S6c Propensity Scores: Means and Standard Errors of the Mean
- S6d Probability of Program Participation and Recovery by Program and Comparison Group Status
- S6e Robustness Analysis for Predicting CPC Preschool Participation by Model Specification
- S6f Robustness Analysis for Predicting CPC School-Age Participation by Model Specification
- S6g Robustness Analysis for Predicting CPC Extended Intervention Participation by Model Specification (Extended-1 Contrast)
- S7a Robustness Results for Selected Outcomes
- S7b Additional Robustness Results for Selected Adult Outcomes
- S8 Unadjusted Means for Adult Outcomes by Age 28
- S9 Adjusted Means with IPW Attrition Correction and Robust Standard Errors for Adult Outcomes by Age 28
- S10 Unadjusted Means by Subgroups and Program Components
- S11 Adjusted Means for Selected Adult Outcomes by Subgroups and Program Components
- S12 Adjusted Means with IPW Attrition Correction and Robust Standard Errors for Adult Outcomes by Age 28 (Dosage of Program Components)
- S13 Main Effects of Selected Outcomes for Three Measures of CPC Participation and the Percentage Reduction in Effects Associated with Five Hypotheses of Mediation
- S14 Standardized Coefficients for Models in which CPC Program Participation Predicts Mediators and Mediators Predict Selected Outcomes

## Supplementary Figures

- S1 Flowchart of Study Sites and Participants in the Chicago Longitudinal Study (Preschool to Age 28)
- S2 Child-Parent Center Program
- S3 Frequencies of Selected Outcomes
- S4 Robustness Results for Insurance and Substance Abuse by CPC Program Components
- S5 Five-Hypothesis Model of Early Education to Adult Well-Being
- S6 Densities Functions by CPC Participation (Preschool, School-age, and Both) and by Treatment Status

## Supporting Online Material

### 1. Materials and Methods

#### 1.1. Study Background

The Chicago Longitudinal Study (CLS) is a life course investigation of the influence of early childhood experiences on health and well-being (1-4). Based on a same-age sample of 1,539 children who attended early childhood programs in the Chicago Public Schools, this prospective study has tracked participants to the end of the third decade of life. About two thirds of participants (N = 989) attended the Child-Parent Center (CPC) Education Program beginning in preschool and one third (N = 550) attended an alternative program in kindergarten as part of the Chicago Effective Schools Project. Seventy (70) percent of the total sample (N = 1,073) attended preschool in 1983-1985, and the entire cohort completed kindergarten in June 1986.

CLS participants were born in 1979 and 1980 and grew up in high-poverty neighborhoods throughout the city. Reflecting the racial and ethnic composition of the local contexts, 93% of the sample is African American and 7% are Hispanic. The neighborhoods in which participants resided were the most disadvantaged in Chicago. The neighborhood poverty rate for study members was 2.5 times that of other areas (39% vs. 15%; 1980 census) and double the citywide average of 20% (5). Three quarters of participants lived in areas in which 60% or more of residents were low-income, defined by 185% of the federal poverty line or below.

The four major goals of the CLS are to (a) document patterns of well-being in multiple domains from school entry through adulthood, (b) assess the impact and cost-effectiveness of the CPC program, (c) identify and better understand the generative mechanisms through which the effects of early childhood experiences are transmitted to well-being, and (d) investigate the contributions to well-being of personal, family, school, and community factors, especially those that can be altered by program or policy intervention.

In this report, data are included from birth to age 28, up to 25 years after program enrollment at ages 3-4 years. Data have been collected from many sources thus enabling comprehensive examinations of the predictors of well-being over time and the processes through which they occur. These include birth and school records; parent and teacher surveys; participant surveys from third grade into adulthood; standardized tests over the school-age years; child maltreatment and justice system records; educational attainment, adult earnings, employment, and public aid; and family and parenting behaviors (3, 4).

The CLS is currently in the adult phase and examines links between early childhood intervention and well-being from age 24 onward (3, 4, 6). In three earlier phases, the study has investigated the multi-level predictors of early childhood development by age 10 (7, 8), middle childhood and adolescence up to age 18 (9, 10) and the transition to adulthood from ages 18 to 24 (11-13). Sample sizes in early childhood, adolescence, and the adult transition were, respectively, 1,246, 1,268, and 1,372. In the adult phase--the focus of this report--it is 1,386. This includes participants with valid data on educational attainment or socioeconomic status. The study sample range for other outcomes is from 1,233 to 1,473.

#### 1.2. Design and Study Sample

The original CLS sample included the complete cohort of 989 children who completed preschool and kindergarten in all 20 CPCs (3, 5) and 550 low-income children who did not attend the program in preschool but participated in a full-day kindergarten intervention program in five randomly selected schools of the Chicago Effective Schools Project and in those affiliated with the CPCs (11, 14). 15% of the comparison group attended Head Start preschool with most

others in home care. Thus, the comparison group enrolled in the usual early childhood interventions available for low-income children in the Chicago public school system. School-age services were provided in first to third grades in affiliated schools regardless of children's preschool or kindergarten participation. Figure S1 shows the patterns of participation. Table S1 shows descriptive information for the program and comparison groups.

In this alternative-intervention, quasi-experimental design, the comparison group matched the program group on age, eligibility and participation in intervention, and neighborhood and family poverty. Eligibility criteria for the program were (a) residence in a school attendance area receiving federal funds from Title I of the 1965 Elementary and Secondary Education Act (for school districts serving high proportions of low-income children), (b) demonstration of high educational need due to poverty-associated factors, and (c) parents agreed to participate up to a half day per week. That the program was a sustained intervention with positive evidence of effectiveness and was dedicated to serve those most in need made it impossible to randomly assign groups to intervention (5, 11, 15). As a consequence, cross-condition contamination was avoided, which is most likely to occur in innovative and desirable interventions. For example, contamination effects (noncompliance) were observed in the randomized study of the National Head Start/Public School Early Childhood Transition Demonstration (6, 16). In support of interpretability of estimates as program effects, findings have been consistent across alternative comparison groups; model specifications and assumptions groups (11, 17, 18), and are largely explained by mechanisms central to the intervention theory (5, 18, 19).

### 1.3. Validity of CPC and Comparison Group Contrasts

Five study features make group comparisons interpretable as program effects. First, the comparison group was chosen primarily from randomly selected schools participating in full-day kindergarten and other school services, which exceeded the usual "treatment" at the time. By comparing groups that received different intervention services (e.g., Head Start), findings test the impact of CPC above and beyond other available early childhood services. This contrasts results in a conservative bias compared with many previous studies. Indeed, all comparison participants attended full-day kindergarten while only 60% of CPC participants did.

Second, most children in the comparison group did not enroll in the program because they did not live in a CPC attendance area. Home residency rather than parent interest determined participation. The process of participation in school-age and extended intervention yielded similar levels of equivalence. The school-age program was open to any child regardless of their level of preschool participation. In most cases, enrollment for 2 versus 3 years was a school administrative rather than a parent decision since the school-age program was limited to second grade in some sites and third grade in others. Extended intervention yielded a similar pattern. Enrollment for five versus six years was determined largely by the school administrative decision to go through second versus third grade. Unmeasured factors differing between preschool and extended intervention participants are implausible given prior findings that growth rates in school achievement between the beginning and end of kindergarten were identical for preschool and the preschool plus school-age groups (20).

Third, more than 80% of children in the neighborhoods of the centers participated in the program, which indicates that program enrollees are representative of the center neighborhoods. This also was due to the centers being located outside of Head Start attendance areas. Because CPCs were located in the highest poverty areas of the city that had no other preschool programs further indicates saturation of program coverage and the greater economic disadvantage of the CPC neighborhoods. Notably, staff enrolled children most in need of intervention through extensive outreach activities and door-to-door canvassing.

Fourth, the pattern of effects over time is largely explained by mechanisms central to the intervention theory, including the enhancement of cognitive and literacy skills, family support behaviors, and the quality of later school environments (5, 21, 22). These findings are part of the confirmatory approach for strengthening validity (18).

Finally, results have been consistent across a wide range of robustness testing by model specification, assumptions, and alternative comparison groups (3, 11, 22). In further support of validity, our findings in this report show robustness across different model specifications and propensity score analyses (Figure 2; Table S7 and Figure S4). Consequently the reliability of the overall effects and by subgroups is strengthened.

#### 1.4. Adult Follow-up Sample and Group Comparability

At an average age of 28 years, 90.1% (N = 1,386) of the original sample had valid data on educational attainment or employment by August 31, 2008 (Figure S1). Recovery rates for the program and comparison groups were 91.0% and 88.4%, respectively. Recovery rates were relatively high for occupational prestige at age 24 (N = 1,335; 86.7%), public aid (N = 1,335; 85.4%) and SES (income and education) at ages 24-27 (N = 1,265; 82.2%) (Table S1). The high rates of sample recovery are due to the use of many sources of administrative and survey data and persistent tracking of CLS participants. About two thirds of the sample resided in Illinois between ages 20-28, with many others remaining in the Midwest. No evidence of selective attrition for the overall sample has been detected (11, 15, 23).

Tables S2a-S2c show the characteristics of the program and comparison groups at the age 28 follow-up. Child and family characteristics were measured from administrative records (birth records, public aid receipt) and family and participant surveys assessing preprogram characteristics primarily from birth to age 3. The *p*-values show the significance of the group differences at follow-up and at the beginning of the study (original sample).

Among the follow-up sample, program and comparison groups were similar on most attributes, including low birth weight, race, child welfare history, single-parent status, mother's employment, financial problems, family conflict, and economic disadvantage (i.e., AFDC receipt and eligibility for subsidized meals). This is best reflected by the risk index, the sum of eight dichotomous family risk indicators. Each group experienced an average of 4.5 demographic risks early in life.

At the follow-up, the program group had a higher proportion of females, a higher proportion of parents who completed high school, and a higher rate of enrollment in high-poverty schools. The latter difference is the result of the centers being located in the most economically disadvantaged school areas. Group comparisons of preprogram characteristics for the original sample show similar equivalence on background characteristics to those of the follow-up sample (11, 15). Among males, program and comparison groups were equivalent on all child and family preprogram attribute (Table S2a).

We note two additional findings. First, group differences in parental education are largely accounted for by other demographic characteristics such that the significant difference on high school completion is no longer detected once the other attributes in Table S2 are taken into account. Indeed, group differences on parent education only exist for females. Second, measures of home environment, assessed retrospectively from the adult survey, show that relative to the comparison group, CPC participants reported similar albeit higher levels of problems such a family conflict and financial difficulties.

#### 1.5. Child-Parent Center (CPC) Education Program

The CPC program is described fully in previous reports (5, 6, 23). Implemented in the

Chicago Public Schools since 1967, it provides educational and family support services between the ages of 3 and 9 (preschool to second or third grade). The program developer Lorraine Sullivan described the philosophy as promoting a nurturing learning climate: "In a success-oriented environment in which young children can see themselves as important, they are 'turned on' for learning. Attitudes toward themselves and others, interest in learning, increased activity, conversation, and enthusiasm are all evidences of the change. Parents are increasingly aware of the role of the home in preparing children for school and have renewed hope that education will develop the full potential of their children" (p. 70) (24).

Within a structure of comprehensive services similar to Head Start, the intervention emphasizes the acquisition of basic skills in language arts and math through relatively structured but diverse learning experiences. These include teacher-directed whole-class instruction, small-group and individualized activities, frequent field trips, and play. Literacy experiences involving word analysis, oral communication, and listening skills are central to the model. Frequently used curricula included Peabody Language Development Kits, AlphaTime, Language Lotto, Bank Street Readers, Math Their Way, and the school district's activity-based curriculum EARLY (5). Based on an ecological framework, family support services are designed to strengthen the family-school relationship through parent involvement in the center and for the benefit of the child. This participation is expected to encourage continuing involvement into the elementary grades (5).

Each center is directed by a head teacher and two coordinators (Figure S2). All teachers have bachelor's degrees and are certified in early childhood education. The parent-resource teacher coordinates the family-support component. The paraprofessional school-community representative provides outreach to families. Major elements of the intervention include: low child-to-staff ratios in preschool (17:2), kindergarten (25:2), and the primary grades (25:2); an intensive parent program that includes parenting education, volunteering in the classroom, attending school events and field trips, furthering education and degree completion, and home visitation; and health and nutrition services, including screening and diagnostic services, speech therapy, meal services, and referrals by program nurses. Parents are expected to participate in the program up to a ½ day per week through a variety of supported activities. About three quarters of CLS parents reported participating at least twice per month (25). The most prevalent activities were attending school meetings, going on class field trips, volunteering in the classroom, and attending programs in the parent resource room. Over 70% of respondents indicated engaging in each of these activities. Given the substantial resources devoted to parent involvement, this level of participation is higher than for most other early childhood programs (26). Previous studies have found that parent involvement is a major mechanism through which program participation affects later child well-being (19, 27, 28).

The preschool program is 3 hours per day, 5 days a week during the school year, and usually includes a 6-week summer program. After full-day or part-day kindergarten, school-age services are provided under the direction of the curriculum parent-resource teacher. Like the preschool/kindergarten component, a staffed parent resource room is available in each site. The school-age intervention is open to any child in the school, either in first and second grade in 14 sites or first through third grade in 6 sites. In the CLS, the rate of participation of eligible children was high as the program was located in areas not served by other preschools, and nearly all families could not afford private child care. In retrospect reports when CLS participants were in high school, parents of 109 comparison participants indicated participation in any other out of home care (primarily Head Start) from birth to age 4. In addition, CPC staff conducted extensive outreach in neighborhoods to enroll families most in need, and, to maximize participation, services were comprehensive in scope and tailored to family needs.

## 1.6. Outcome Measures

The outcomes were conceptualized as indicators of adult well-being synonymous with positive health, mental health, and economic productivity (29, 30). Expanding on previous studies (11, 15), the indicators were theoretically related to the ultimate goals of the CPC program, which is the enhancement of life-course functioning including economic independence and socio-emotional competence.

Data were collected from participant interviews at ages 22-24 and administrative records between ages 23 and 28 and from local, state, and federal agencies. These, including the Illinois Shared Enrollment and Graduation Consortium, the Illinois Department of Employment Security, the Illinois Department of Health and Human Services, the Circuit Court of Cook County, the Illinois Department of Correction, the Department of Motor Vehicles, and the Federal Bureau of Prisons. Table S3 shows the sources of data for measures of adult well-being. The periods of data collection varied. Occupational prestige was collected through December 31<sup>st</sup>, 2004 (mean age of 24.6 years). Criminal justice system data were collected through December 31<sup>st</sup>, 2006 (mean age 26.6). Educational attainment data were collected through August 31, 2008 (mean age 28.3). Finally, socioeconomic status, public aid, health insurance, substance abuse, and family status data were collected through December 31, 2007 (mean age 27.6).

*Educational attainment.* Six measures of educational attainment by age 28 were assessed: (1) On time graduation indicated whether participants graduated from high school by 1998; (2) High school completion measured whether participants finished their high school education with an official diploma or received a GED or equivalent credential. All others were coded as “non-completers.”; (3) Highest grade completed was an ordinal indicator ranging from 3 to 19 (19 = completed a professional degree). Those completing high school or the GED were coded 12. Postsecondary education was derived from the number of credits earned in college courses; (4) College attendance measured earned credits in college courses; (5) 4-year college attendance measured whether participants earned credits in institutions granting a bachelor’s degree; and (6) BA or AA completion measured whether participants earned a bachelor’s or associate degree. Measures were derived from administrative records from colleges and universities in Illinois (31) and other states, K-12 schools, and brief surveys of CLS participants or family members.

*Socioeconomic status (SES).* SES was assessed from age 24-27. Measures were derived from quarterly income and unemployment insurance records from the Illinois Department of Employment Security, as well as participant interviews completed between ages 22-24. Occupational prestige by age 24 was measured through two variables (46, 47). Employing self-reported occupational information on participants’ current and previous two episodes of employment, participants who completed the adult survey were assigned an occupational prestige/skill score between 1 (low prestige/skill) and 9 (high prestige/skill). Occupational prestige for participants was based on ratings from the 1989 General Survey (32) and the Barratt Simplified Measure of Social Status (33), adapted from the 9-point Hollingshead Index of Social Status (34, 35). Table S4 shows the Occupational Prestige Scale used.

A dichotomous measure was created to distinguish between participants reporting low prestige/skilled occupations (occupational prestige/skill of less than 4) and participants reporting moderate to high prestige/skilled occupations (occupational prestige/skill of 4 or more). Moderate to above occupational prestige signifies semi-skilled work typically requiring post-secondary education or training. Missing occupational data was supplemented with incarceration, employment, and education data.

A composite measure of SES was constructed from data on educational attainment and employment income. Educational attainment by age 26 (August 31<sup>st</sup>, 2006) was coded into a 5-point scale: 0 = high school dropout; 1 = completed GED; 2 = high school graduate; 3 = some post-secondary no degree, associate degree, or certificate; and 4 = 4-year degree or higher. Similarly, average annual income (2007 dollars) between ages 24-27 was coded into a 5-point scale: 0 = \$0-\$8,999; 1 = \$9,000-\$13,999; 2 = \$14,000-18,999; 3 = \$19,000-24,999; and 4 = \$25,000 or more. For each participant, a combined score was generated from the sum of the assigned educational attainment and income scores. In addition, a dichotomous SES measure was created to identify participants with moderate to above SES (combined scores of 4 or more).

To measure general SES, a dichotomous variable indicated whether participants completed a degree (bachelors or associates) by age 26 and/or had a stable work history, defined as 8 or more quarters of employment between 2004 and 2007.

Full-time employment was measured from interviews completed between ages 22-24 and defined as 35 or more hours per week. Survey data were supplemented with employment earnings data from the Illinois Department of Employment Security. Participants were assumed to be employed full-time if they had earnings of \$5,000 or more for 8 or more quarters between 2004 and 2007.

Administrative data on quarterly income from the Illinois Department of Employment Security were used to estimate average annual income between 2004 and 2007. Income data were supplemented with information from interviews as well and incarceration and public aid data. Five categories of annual earnings in 2007 dollars were constructed (0 = \$0-\$8,999; 1 = \$9,000-\$13,999; 2 = \$14,000-18,999; 3 = \$19,000-24,999; and 4 = \$25,000 or more). Each CLS participant was assigned the median value for their income bracket. The natural logarithm was used in the analysis. In addition, a dichotomous measure identified participants with average annual income of \$14,000 or more.

*Public aid receipt.* Public aid participation was measured through enrollment in TANF and Food Stamps from ages 18-23 and ages 24-27. Data were from the Illinois Public Assistance Data Base maintained on behalf of the Illinois Department of Human Services (36). Number of months of enrollment and the cumulative prevalence were analyzed for CLS participants residing in Illinois in 1999 or later. For TANF and Food Stamps, 2 measures were created: (1) any participation; and (2) two or more years of participation.

*Health status and behavior.* Health insurance coverage, from public and private (typically employer-based) sources, was assessed by age 27. Public insurance information was from state-level Medicaid records and CLS participant responses between ages 22-24 to interview questions regarding current health insurance coverage. Private insurance coverage was determined from responses to adult interview questions (e.g., “Do you get health benefits from your employer?”) and was supplemented with administrative data from the Illinois Department of Employment Security as well as post-secondary institutions in Illinois. CLS participants who earned at least \$5000 in 7 or more quarters between 2004 and 2007 and/or completed 31 or more course credits at a 4-year college (equivalent to one year) by age 25 (August 31<sup>st</sup>, 2005) were assumed to have had private health insurance between 2004 and 2007.

Two indicators of substance abuse between ages 16-26 were assessed. First, a dichotomous variable indicated whether participants were charged and convicted of drug possession between ages 16-26 and/or reported one or more of the following at the time of the age 22/24 adult survey: a) current use of marijuana or harder drugs; b) substance use problem; and/or c) substance abuse treatment. Second, a measure of drug and/or alcohol abuse between ages 16-26 indicated whether CLS participants satisfied the above criteria for substance abuse and/or had a motor vehicle record of “driving under the influence” and/or reported frequent alcohol

consumption. Data for both measures were from adult interviews, and were supplemented with official conviction records through age 26 (37).

*Crime and justice system involvement.* Arrest, conviction, and incarceration histories from ages 18-26 were obtained from archived Cook County, Illinois circuit court records, the Illinois Department of Corrections, and the Federal Bureau of Prisons. Additional county-level data were obtained from all counties representing Wisconsin and Iowa, as well as Hennepin County, which encompasses Minneapolis and St. Paul, Minnesota. State and Federal incarceration data were also compiled for participants detained outside of Illinois. Administrative data were supplemented with information from adult interviews. Arrests were assessed with a measure of the number of arrests between ages 18-26 and a dichotomous measure identified participants who had been arrested one or more times over the same time period. Arrests for felony charges were measured similarly. Arrests for charges of violence and convictions were also measured similarly. In addition, a measure of incarceration identified CLS participants who were sentenced to a state or federal correctional institution or to a county jail beyond 30 days between ages 18-26.

*Family status.* Five measures of family status were assessed. Measures were derived from adult interviews and supplemented with administrative records from the Illinois Department of Human Services and other sources through age 27. Parenting indicators included age at the birth of the participant's first child (if any), a dichotomous indicator of parenthood (i.e., gave birth or fathered one or more children) by age 27, the number of children, and whether the participant had three or more children. Marital status assessed whether CLS participants were married or lived with a partner between ages 23-27.

Table S5 presents descriptive statistics for the measures of well-being, program participation, and the covariates. Figure S3 shows the frequency distributions for six outcomes; Highest grade completed in education, occupational prestige, average annual earnings, age at first adult arrest, number of arrests, and number of felony arrests.

### 1.7. Covariates

Measures of preprogram attributes were from birth records, interviews with CLS participants and parents, and administrative records provided by the Illinois Department of Child and Family Services, the Illinois Department of Health and Family Services, and the Chicago Public Schools. School and neighborhood poverty status were from U. S. Census records. As shown in Table S2a, the preschool intervention and comparison group were similar on most child and family characteristics measured primarily from birth to age 3. Table S2b and S2c show similar patterns for the CPC school-age and extended intervention and comparison groups.

### 1.8. Analytic Strategy

Following previous reports (11, 15), program effects were estimated by probit, negative binomial, and multiple regression in STATA statistical software (38). For each adult outcome measured up to age 28, the effects of CPC preschool at ages 3 and/or 4 (1 to 2 years) and CPC school-age intervention at ages 6 to 9 (1 to 3 years) were estimated simultaneously with two dummy-variables. Children's school-age participation did not depend on earlier preschool participation.

The effects of CPC extended intervention were assessed in two ways and separate from preschool/school-age participation. The first was with a dummy variable indicating participation or a total of 4 to 6 years (preschool to second or third grade) versus all other children who had less extensive or no CPC intervention (0 to 4 years; extended-1 contrast). This contrast assessed

whether children receiving the full program did better than others regardless of intervention experience. The second extended intervention contrast was between the 4- to 6-year group and children who attended only CPC preschool and kindergarten (1 to 3 years; extended-2 contrast). This estimate assessed the added value of continuing intervention above and beyond preschool and kindergarten. Unlike other models, achievement at the end of Kindergarten (word analysis scores on the Iowa Tests of Basic Skills) was included for the extended-2 contrast. Note that with this addition any synergistic effect of the combined components is removed.

Findings are reported as adjusted means or percentages and group differences after corrections for three types of potential biases in estimation. First, 15 covariates were included in the model to adjust for measured differences in child and family background and early experiences between groups. With the exception of public aid, subsidized lunches, and home environment, the covariates were measured from birth to age 3 from administrative records from the State of Illinois (e.g., birth records, public aid, child welfare) or family surveys. A dummy code for missing data on the covariates also was included in the models to assess if estimates based on multiple imputation were associated with program outcomes. Estimates from this model were compared to the unadjusted group differences.

The second bias reduction strategy was that estimates were corrected for attrition by Inverse Probability Weighting (IPW) (39, 40), which is also called Inverse Probability of Treatment Assignment Weighting (IPTW). In this approach, the predicted probability of being in the recovery sample ( $R = 1$ ; otherwise 0) is estimated for each outcome measure via probit (or logit) regression conditioned on a set of predictors ( $X$ ) hypothesized to influence sample recovery. The first propensity score was estimated as follows:

$$P_{1i} = \Pr(R = 1|X)$$

The model included 26 variables including program participation and the covariates in Table S6a. The inverse of this predicted probability ( $1 / P_{1i}$ ) was used as a weight variable in all outcome models after verifying that data were missing at random (controlling for  $X$ s) and that propensity distributions between groups overlapped. The IPW approach has been found to be more efficient than other propensity methods in that it yields the lowest variances and standard errors in large samples (22, 41-44). Furthermore, it is estimated independently of the outcome model specification. Unlike propensity score matching, IPW uses all available data and can be combined with other propensity scores (e.g., program selection) to efficiently estimate double or more complex adjustments (41, 44, 45). Previous studies of CPC effects have not tested these approaches. Tables S6a to S6d and Figure S6 show further descriptive results and supporting evidence. Tables S6e to S6g report the robustness findings for the predicted propensity scores for preschool, school-age, and extended intervention.

Findings were also reported for models using IPW weights ( $P_{2i}$ ) for selection into each of the intervention components and combined models ( $P_{3i}$ ) based on the product of the IPW attrition and IPW program selection weights. These two additional scores were estimated as follows, in which  $T$  denotes participation in the program ( $T = 1$ ; otherwise 0) and  $X$  a set of covariates:

$$P_{2i} = \Pr(T = 1|X)$$

$$P_{3i} = P_{2i} * P_{1i}$$

The estimated model for program selection (preschool, school-age, and extended intervention) was based on 17 preprogram predictors with weights  $1/P_{2i}$  for the program group and  $1/(1 - P_{2i})$  for the comparison group (Table S6b). To test robustness, propensity score matching and regression-based propensity score adjustments were conducted for program selection using the same estimated propensity score but utilizing case-by-case matching or entry of the propensity score as a regressor in the outcome model.

The third and final bias reduction strategy involved corrections for clustering by 25 program and comparison group sites (intra-class correlation). Although improving efficiency of estimates (robust standard errors), these made little difference given the length of time between program participation and the measurement of outcomes.

To enhance interpretability, coefficients from probit and negative binomial regression were transformed to marginal effects. Group differences at the .05 probability level were emphasized. To test effects by child, family, and program attributes, the significance of interactions terms, which were added to the model described above, was set at .05 with interpretations reserved for outcomes showing overall effects. Domains in which more than one indicator was found to be significant were also emphasized in reporting.

### 1.9. Background on Propensity Score Procedures

Nonrandom attrition presents a potential threat to accurate estimation of program effects in all research designs. In the presence of attrition, the potential bias arises from the fact that people who leave the sample can have different characteristics than people who stay in the sample which causes an imbalance between the initial sample and the final (retained) sample. We used various propensity score approaches to control for attrition bias: matching with one-to-one neighbor, kernel, and radius as well as propensity score weighting. Similar effects were found when we applied the alternative methods. We estimated primary results using IPW because the technique is increasingly common and achieves the lowest possible asymptotic variance among methods (46). Although a disadvantage of IPW is that extreme scores (close to 0 or 1) producing large weights can yield unstable estimates, this did not appear to be an issue in the analyses.

We also assessed propensity score approaches for program selection in robustness analysis. Because previous studies have investigated potential selection bias into the CPC program (15, 17, 20, 43, 47), our report emphasizes propensity score adjustment for attrition. We do, however, test the interaction between attrition and selection through IPW.

Propensity score methods can produce unbiased estimates when response assignment is strongly ignorable. This occurs when the response assignment and the potential outcomes are conditionally independent given the covariates  $X$ :  $\Pr(R|X, Y) = \Pr(R|X)$ . Attrition-related factors associated with the ability to track participants include neighborhood mobility as a proxy of residential mobility and whether or not we know a participant's social security number. The ignorability assumption also implies that all relevant differences between the retained and missing groups are captured by their observed covariates. Given the large amount of longitudinal data available for participants from a variety of administrative and survey sources, covariates are comprehensive and control well for differences between the final sample and those missing adult outcome data. For this reason and because we used a placebo test to assess ignorability, we are confident the ignorability assumption is satisfied (43).

In the CLS, we collected outcome measures denoted as  $Y$  (e.g. highest grade completed, SES, felony arrest) on a sample of  $n$  participants. Information on these outcomes is missing for some participants. Let

$R_i = 1$  if  $Y_i$  is observed  
 $= 0$  if  $Y_i$  is missing

$T_i = 1$  if the individual participates in the CPC program  
 $= 0$  otherwise

$X$  = covariates

$\hat{\rho}$  = estimated propensity score probability for attrition representing  $P_{1i}$  (see above)

$\hat{\pi}$  = estimated propensity score probability for selection representing  $P_{2i}$

Under the ignorability assumption and the common support assumption,  $0 < \text{Prob}\{R = 1 | T = t, X = x\} < 1$  for  $x$ , we assume the propensity score is bounded away from 0 and 1. Following (92), the average treatment effect (ATE) on respondents, taking into account sample attrition is identified by:

$$ATE = \Delta_{IPW} = E \left[ \frac{R_i Y}{\hat{\rho}(1, X)} / T_i = 1 \right] - E \left[ \frac{R_i Y}{\hat{\rho}(0, X)} / T_i = 0 \right] \quad (1)$$

where the response propensity score given  $(T, X)$ , is defined as  $\rho(T, X) \equiv \text{Pr}(R = 1 | T, X)$ . Thus, weighting observations by the inverse of their respective response propensity score identifies the ATE. Formally, the missing data process that we are assuming in this study is missing at random (MAR), which means that attrition is explained by a set of observed characteristics represented as the  $X$  variables used as covariates. Researchers (44, 48) have used this IPW to adjust for missing data in regression models.

Implementation of propensity score weighting to control for attrition begins with fitting a binary response model that predicts the probability of sample recovery ( $R_i$ ) for each outcome, given the covariates,  $X$  (child characteristics, family risk factors and neighborhood characteristics). The estimated probabilities generated by a single probit regression are the propensity scores used to construct the weights. Participants are assigned weights equal to the inverse of the predicted probability of being retained. As a result, individuals with overrepresented intervention status, given their covariates, get smaller weights. This reweighted sample more closely resembles a randomized sample in which each individual has the same probability of being included.

We calculated different probabilities of being retained in the sample according to the group of outcomes and the age of participants. Sample sizes varied by outcome because data were obtained from different sources. The probability of being observed in each of the outcome samples was estimated (e.g., educational attainment, SES, crime; Tables S6c and S6d). The outcome models were then tested weighting by the inverse of each respective propensity score ( $1/P_{1i}$ ). Figure S6 shows the similarity of the density plots for estimated propensity scores for different program groups.

*Robustness checks.* We further examined the robustness of coefficients considering alternatives methods to reduce/eliminate bias. This included estimating the effects of CPC participation adjusting for program selection as well as program selection and attrition.

For selection, we used two similar assumptions, ignorability and common support. The

ignorability assumption is satisfied when the treatment assignment,  $T$ , and the potential outcomes,  $Y$ , are conditionally independent given the covariates  $X$ :  $\Pr(T|X, Y) = \Pr(T|X)$ . This assumption is different than the one described for attrition in the sense that the factors that explain participation in the program ( $T$ ) are different than the factors that explain retention ( $R$ ). For example, factors accounting for CPC preschool participation are: age of the child in months, a measure indicating if the child is underage or overage at the time of CPC preschool participation; and neighborhood characteristics, because the CPC program was offered in impoverished neighborhoods that were eligible for Title 1 funding. The common support assumption,  $0 < \text{Prob}\{T = 1 | X = x\} < 1$  for  $x$ , also assures that the treatment propensity score is bounded away from 0 and 1, which rules out arbitrarily large weights and reestablishes internal validity. Thus the average treatment effect taking into account only sample selection is identified by:

$$ATE = E \left[ \frac{T_i Y_i}{\hat{\pi}(X_i)} - \frac{(1-T_i) Y_i}{1 - \hat{\pi}(X_i)} \right] \quad (2)$$

Equation (2) is used to estimate the effect of CPC participation on different outcomes. We also estimate the effect of CPC participation correcting for both selection and attrition. To do that, we first need to re-write equation (1). The assumption that the covariates,  $X$ , are the same for both treatment and comparison groups is relaxed, and given outcomes for only the retained variables, equation (1) is re-written as:

$$ATE = \Delta_{IPW} = E \left[ \frac{T_i Y}{\hat{\rho}(X)} - \frac{(1-T_i) Y}{1 - \hat{\rho}(X)} \middle| R = 1 \right] \quad (1')$$

Equation (1') reweights the outcomes of respondents by the inverse of the treatment and non-treatment propensity scores. To identify the treatment effect, we control for differences in the distribution of the covariates across treatment and control groups. Because the model is estimated only for those with valid outcomes, the average treatment effect taking into account both sample selection and sample attrition is the combination of equations (1') and (2):

$$ATE = E \left[ \frac{T_i Y_i}{\hat{\pi}(X_i) \hat{\rho}(X_i)} - \frac{(1-T_i) Y_i}{[1 - \hat{\pi}(X_i)][1 - \hat{\rho}(X_i)]} \right] \quad (3)$$

$$= \frac{1}{n} \sum_{i=1}^n \frac{T_i Y_i}{\hat{\pi}(X_i) \hat{\rho}(X_i)} - \frac{(1-T_i) Y_i}{[1 - \hat{\pi}(X_i)][1 - \hat{\rho}(X_i)]}$$

This IPW approach has been widely used in medical experiments (44, 48, 49), the social sciences (45, 92), and is applied to selection, attrition, and a combination of the two. Although the IPW approach is usually efficient relative to other matching estimators (39), we did conduct additional analyses using alternative techniques in an attempt to eliminate potential biases. We examined different propensity score approaches: matching with one-to-one neighbor, kernel matching, Mahalanobis matching, propensity score weighting, and propensity score as a

regressor. We present these results on table S7a. In the case of matching techniques, we only show the results for bi-weight kernel matching, because its effects are similar to the average effect of all the mentioned matching methods. Moreover, bi-weight kernel is the most commonly used technique because it is bounded and simple to calculate. Also, the decision of which estimator is most appropriate for a given data analysis requires knowledge of which parts of the data generating distribution can most reliably be modeled and estimated from available data. The CLS provides comprehensive information on participants since birth, their families, and the broader social context. This strengthens confidence that correction methods relying on observables are feasible and will result in unbiased estimates.

Our decision to use the IPW estimator is based on the less restrictive assumption of a correct specification of the probability of CPC participation given observed covariates at or before the treatment, and the probability of attrition given observed covariates at or before attrition. In contrast, both the double robust method and maximum likelihood estimator require correctly specified models for all outcome equations. Because we were interested in whether CPC participation impacts well-being, and at what levels of dosage, the covariates were the same for all outcomes. Another methodology to correct for selection and attrition could affect the consistency and interpretation of findings from one model to another.

Table S7a shows the effects of CPC preschool, school-age and extended intervention on selected adult outcomes, when using a matching technique, a regression propensity score approach, and inverse probability weighting to correct for attrition. All three techniques yielded similar results. Table S7b displays results for additional robustness analyses. The first relates to the possibility of selection bias. Individuals participating in the CPC program were matched at the beginning of the study with individuals who were similar in every observable way other than treatment. Preprogram characteristics show that both groups are well-matched. Moreover, previous studies investigating the possibility of selection bias using latent variable, bounding, and fixed effects approaches show no evidence of bias (17, 43, 47). Further results are reported in Section 2.5. Also see Tables S6a to S6g and Figure S6 for additional supporting evidence.

Our estimates are more conservative when using the IPW attrition correction in contrast to using the selection correction or both corrections. We emphasized the estimates from attrition.

## **2. Supporting Text**

### **2.1. Research Background**

In a previous study of the CPC program (11), preschool participation was associated at age 24 with higher educational attainment, a higher rate of health insurance coverage and with lower rates of felony arrest, incarceration, and depressive symptoms. Extended intervention into the school-age years was associated with higher educational attainment and rates of full-time employment. Due to the age of assessment in young adulthood, a full range of economic, health, and family outcomes was not investigated such as socioeconomic status, substance use, private insurance coverage, and parenting status. Moreover, systematic tests of variations in impact by program, child, and family subgroups were limited to gender and family demographics. Although attrition and selection bias did not appear to bias estimates, it was not incorporated in model estimation. To the extent that subgroups had greater attrition and this varied by program participation, estimates could be adversely affected.

In assessing the long-term effects of a large-scale and sustained school-based program, the CLS addresses many shortcomings of previous research. One is that evidence on long-term effects is primarily limited to small-sample efficacy trials (14, 50-53). The program characteristics of efficacy studies do not closely match those of contemporary and routinely

implemented public programs. The effects of large-scale, sustained programs into adulthood have rarely been investigated, especially for economic, social and health outcomes. No studies of sustained public-funded programs have continued past age 25. Despite the increasing evidence of positive effects of early intervention in the U.S. and other countries (54-56) and for varying levels of family income (57, 58), enduring effects of participation are difficult to achieve, as indicated by follow-up studies of Early Head Start (59) and Head Start (60) as well other programs (61).

Another shortcoming of research is inadequate attention to program dosage, a key modifiable characteristic. Programs vary widely in duration and intensity yet the effects of this variation are not well understood. Although some studies show that the length of preschool participation is positively associated with child outcomes in the short-term (17, 62), longer-term effects into adulthood have been rarely investigated, especially for large-scale sustained programs. Moreover, the extent to which services that continue into kindergarten and the primary grades have added or synergistic benefits beyond earlier participation has not been fully assessed.

In addition to program dosage, variations in effects by child, family, and social context have rarely been investigated. Their identification provides important information for tailoring or strengthening services (63, 64). Most previous studies have too small sample sizes to assess a range of subgroup effects. Although some studies show differences in effects by gender (14, 15), this impact varies by study and outcome. Evidence is more consistent that children from higher risk or more disadvantage families experience larger effects than children from less disadvantaged families, but a greater focus on long-term effects is needed.

A final limitation is that attrition is rarely taken into account in estimating the effects of intervention. Longitudinal studies of preschool and other early childhood interventions frequently lose up to 50% of their original samples in adolescent and adult follow-up assessments. For example, the sample recovery rates were 65% in the Infant Health and Development Program (65), 63% in the Houston Parent Child Development Center (66), 55% in the Syracuse Family Development Research Program (67), 55% in the National Impact Study of Early Head Start (68), and 55% in the Cornell Consortium for Longitudinal Studies (69). Large-scale multisite studies are especially problematic in this regard. Attrition can affect the validity of estimates and generalizability of findings. The power and precision of subgroup effects can be especially compromised. Propensity score and related bias reduction methods to account for attrition and other selection processes has led to integrative procedures of estimating longitudinal effects (21, 22, 41).

## 2.2. Unadjusted Group Means and Differences

Unadjusted rates and mean differences for 4 levels of CPC intervention (preschool, school-age, Extended-1 contrast, and Extended-2 contrast) are presented in Table S8. Over 44% of the CPC preschool group graduated from high school on-time. In comparison, less than 35% of the preschool comparison group graduated on time. By age 28, 80.3% of the preschool group and 72.7% of the comparison group had completed high school. Furthermore, although the rates of college degree completion by age 28 are similar (8.5% vs. 7.6%), a larger percentage of the preschool group attended a 4-year college by age 28 (14.7% vs. 10.5%). In addition, preschool group participants, on average, received higher composite socioeconomic status ratings and appear to have been less involved in criminal behavior.

The rates of on-time graduation for the school-age intervention and comparison groups are 44.4% and 36.5%, respectively. However, by age 28, the disparity in educational attainment was substantially reduced as measured by high school completion (79.3% vs. 75.3%). High school

completion counts not only official diplomas (on-time or not) but GED credentials.

48.6% of participants who received 4-6 years of CPC intervention graduated from high school on-time. In comparison, 36.5% of participants who received 0-3 years graduated on-time. Again, the disparity was reduced by age 28 as measured by high school completion (81.8% vs. 75.2%). Over 38% of participants who received 4-6 years of intervention were assigned composite socioeconomic status ratings of moderate or above. Less than 32% of participants who received 0-3 years of intervention were assigned composite ratings at or above the same threshold.

### 2.3. Additional Findings on Main Effects

Table S9 shows the findings by outcome domain for each intervention contrast.

#### *2.3.1. Educational Attainment and Economic Well-Being*

*Preschool participation.* Relative to the comparison group and controlling for preprogram characteristics, the preschool group had significantly higher levels of educational attainment for 4 of 6 measures, including highest grade completed (12.2 vs. 11.9,  $p = 0.03$ ) and attendance in a 4-year college (14.7% vs. 11.2%;  $p = 0.04$ ). No differences were found for degree completion.

These educational advantages translated to higher economic status, including occupational prestige (2.8 vs. 2.5;  $p = 0.03$ ; scale of 1-9), SES composite (education and income) score of 4 or higher (34.4% vs. 28.6%;  $p = 0.03$ ; scale of 0-8), and average annual income (\$11,582 vs. \$10,796;  $p = 0.02$ ). Moreover, a higher percentage of the program group had an occupational prestige level (job skill) of 4 or higher (28.2% vs. 21.4%;  $p = 0.01$ ), synonymous with postsecondary training. No differences were detected for employment.

*School-age participation.* The lone difference was that the school-age group had a higher rate of on-time high school graduation than the comparison group (44.4% vs. 35.3%,  $p = 0.01$ ). For most other educational and economic indicators, the program group had small advantages.

*Extended program participation.* We emphasize results for the extended-1 contrast (4 to 6 vs. 0 to 4 years of participation). This contrast assesses the likely synergistic effects of preschool and school-age program components. Similar to preschool, the extended-1 group had significantly higher levels of educational attainment, including highest grade completed (12.3 vs. 12.0,  $p = 0.01$ ), occupational prestige (2.9 vs. 2.6;  $p = 0.03$ ), and the SES composite (3.1 vs. 2.7;  $p = 0.02$ ). No significant differences were found in annual income, college attendance or degree completion, and employment.

#### *2.3.2. Public Aid*

*Preschool participation.* No consistent pattern emerged. The preschool group had a lower rate of Food Stamp receipt by age 24 (54.8% vs. 59.6%;  $p = 0.04$ ) but this did not continue to age 27. They also had a lower rate of participation in TANF for two or more years by age 27 (1.6% vs. 2.2%;  $p = 0.06$ ).

*School-age participation.* Relative to the comparison group, the school-age group had a lower rate of Food Stamp receipt from ages 24-27 (43.9% vs. 52.0%;  $p = 0.02$ ). This was not apparent from ages 18-24.

*Extended program participation.* No group differences were detected for either contrast. The general pattern was that the extended group had slightly lower rates of public aid receipt. Based on the extended-2 contrast, participation was linked to lower Food Stamp receipt from ages 24-27 (45.9% vs. 54.2%;  $p = 0.09$ ).

### 2.3.3. Health Status and Behavior

*Preschool participation.* The preschool group had a higher rate of health insurance coverage (75.9% vs. 63.9%;  $p < 0.01$ ), including private insurance linked to employment (49.1% vs. 39.5%;  $p = 0.01$ ). They also had significantly lower rates of substance abuse by age 26 (13.7% vs. 18.9%;  $p = 0.01$ ) and drug and alcohol abuse (16.5% vs. 23.0%;  $p < 0.01$ ).

*School-age participation.* No group differences were found for any health-related outcome.

*Extended program participation.* Similar to preschool, the extended program group had a higher rate of health insurance coverage (75.7% vs. 69.6%;  $p < 0.01$ ), including private insurance (51.8% vs. 42.2%;  $p < 0.01$ ). Although in the expected direction, no differences were found for substance abuse.

### 2.3.4. Crime and Justice System Involvement

*Preschool participation.* By age 26, the preschool group had significantly lower rates of crime and justice involvement for 3 measures, including arrests for any charge (47.9% vs. 54.3%;  $p = 0.03$ ), felony arrests (19.3% vs. 24.6%;  $p = 0.02$ ), and incarceration/jail (15.2% vs. 21.1%;  $p = 0.04$ ). No differences were detected for the number of arrests.

*School-age participation.* No differences were found.

*Extended program participation.* No differences were found.

### 2.3.5. Family Status

*Preschool participation.* No differences were found for parenthood, number of children, and marital status. The program group was slightly older at the birth of their first child.

*School-age participation.* The program group had a significantly higher rate of parenthood by age 27 (65.7% vs. 59.6%,  $p = 0.05$ ). No differences were detected for the other outcomes including the number of children and marital status.

*Extended program participation.* Following a similar pattern as preschool, no significant differences were found.

## 2.4. Differences by Subgroup Characteristics

The most consistent evidence of differential effects was for gender of participants and parent educational attainment. We found limited evidence that program effects varied by other child and family characteristics, neighborhood poverty, and dosage within program components. Table S10 shows the unadjusted means by selected subgroups and program components. Table S11 summarizes the subgroup findings for four outcomes: high school completion, SES, substance abuse, and felony arrest.

*Gender.* Male preschool participants showed substantially higher levels of well-being than the male comparison group participants in high school completion (77.5% vs. 63.5%;  $p < 0.01$ ) and substance abuse (33.7% vs. 42.9%;  $p < 0.01$ ) whereas female preschool and comparison group participants exhibited nearly identical rates (85.4% vs. 86.9%;  $p = 0.60$ ; 3.9% vs. 4.8%;  $p = 0.60$ , respectively). In contrast, females showed comparatively greater effects of school-age (89.8% vs. 80.3%;  $p = .02$ ) and extended intervention (88.0% vs. 81.6%;  $p = .07$ , extended-2 contrast) than males (70.0% vs. 75.7%;  $p = 0.10$ ; 74.0% vs. 79.7%;  $p = 0.31$ , respectively)

*Race/ethnicity.* For all levels of intervention, impacts were similar for African American and Hispanic participants.

*Parent education and family demographics.* Preschool participants whose parents were high school dropouts experienced significantly larger effects of intervention than participants whose parents were high school graduates for high school completion, felony arrest, and substance abuse (Figure 1). As shown in Table S11, the preschool participants of high school dropouts had

a rate of felony arrest that was half the rate for the comparison group of high school dropouts. No consistent differences in effects of intervention were detected by single-parent family status, adverse early home environment (e.g., frequent family conflict), and presence of 4 or more family risks. For substance abuse and felony arrest, preschool participants with 4 or more family risks experienced greater preventive effects than those at lower risk.

*Neighborhood poverty.* Although the general pattern was that children from the highest poverty neighborhoods exhibited greater effects of preschool than those from lower-poverty neighborhoods, only for felony arrest and substance abuse were these differences significant.

*Home environment.* No consistent pattern emerged between children experiencing adverse home environments from birth to age 5 versus those that did not.

*Program dosage.* The school-age group with 2 or 3 years of participation had higher rates of on-time high school graduation (41.5% vs. 28.5%;  $p = 0.03$ ) and private health insurance coverage (49% vs. 38.5%;  $p = 0.003$ ) than the 1-year group. With the exception of arrests for violence (14.1% vs 19.3%;  $p = 0.019$ ), length of preschool (2 years vs. 1 year) was unrelated to adult well-being. Extended intervention (5 or 6 years vs. 4 years) was linked to lower rates of arrests for violence for the primary contrast (13.4% vs. 20.8%;  $p = 0.002$ ) and the alternative contrast (extended-2; 14.1% vs. 19.3%;  $p = 0.019$ ). Also for the primary contrast, a greater percentage of the 5- to 6-year group had an average annual income of \$14,000 or more (36.1% vs. 28.1%;  $p = 0.027$ ). S12 shows the adjusted means of adult outcomes by program dosage.

## 2.5. Robustness by Model Specification

As shown in Table S7a, estimates for preschool, school-age, and extended intervention participation were consistent across eight different specifications ranging from no adjustment to IPW-attrition adjusted, and IPW-attrition and program-selection adjusted models. For the latter, the inverse of the estimated propensity score for program participation (based on 17 predictors) was multiplied by the IPW for attrition and this product was the weight in the model. The marginal effects of intervention applying this double-correction weight supported the beneficial effects of intervention. In this model, the effect of preschool on socioeconomic status (score of 4 or higher) was slightly larger than in the IPW attrition model (5.8 vs. 5.4 percentage points) and slightly smaller on health insurance coverage (10.6 vs. 12.1 percentage points), felony arrest (4.6 vs. 4.8 percentage points) and substance abuse (4.3 vs. 4.8 percentage points). Estimates were unaffected by the number and type of covariates in the model.

Table S7b shows additional robustness results for five outcomes, including felony arrest, substance abuse and health insurance coverage, using the propensity score as a regressor and as a weight. Findings showed a high level of consistency. Figure S4 displays the pattern of impacts for substance abuse and health insurance coverage.

## 2.6. Mediators of Effects on Well-Being

To determine if the main effects of intervention can be explained by theory-relevant behaviors, we tested the Five-Hypothesis Model (5HM, Figure S5) of early education (18) for SES, on-time high school graduation, high school completion, felony arrest, and substance abuse. In the 5HM, the impacts of intervention are posited to be a function of cognitive advantage, social adjustment (e.g., rule conformity, peer relations), motivational advantage (e.g., school commitment), family support behavior (e.g., parent involvement), and school support (e.g., school quality). The five domains of mediators were assessed together in the full model.

Measured from multiple sources from ages 5 to 21, the indicators were as follows: (a) cognitive advantage: cognitive composite at age 5 (school entry) on the Iowa Tests of Basic Skills (ITBS), special education placement or grade retention by age 15, and ITBS reading

achievement at age 14; (b) social adjustment: teacher ratings of classroom adjustment at ages 7-9 (6-item scale; e.g., “Complies with classroom rules, “Works and plays well with others”), youth ratings of trouble making behavior at ages 9-12 (4-item scale; “I get in trouble at school”, “I get in trouble at home”), and official records of juvenile arrest by age 18; (c) motivation advantage: teacher ratings of achievement motivation at ages 5-6 (23-item scale; “Is eager to learn, “Actively listens to stories”) and youth reports of school commitment at ages 11-12 (32-item scale; “I try hard in school”, “I do my homework”); (d) family support behavior: teacher ratings of parent involvement in school at ages 7-12 (5-point scale; “Parent’s participation in school”) and substantiated reports of child abuse and neglect at ages 4-12; and (e) school support behavior: number of school moves at ages 10-14 (school records) and enrollment in relatively high quality schools at ages 10-14 (magnet schools or schools in which 40% or more of students were at/above national norms in reading and math achievement). High school completion by age 21 was included as a cross-domain indicator of primarily the cognitive advantage, motivational advantage, and social adjustment hypotheses.

Based on these well-established indicators of the model (18, 19), Table S13 shows that the five sets of mediators accounted for 60%-100% of the main effects of preschool and 38%-100% of the main effects of extended intervention. The effects of preschool participation on on-time high school graduation, high school completion, SES, and felony arrest were completely explained by 5HM. The model accounted for 65% of the preschool main effect on average annual income and 60% of the main effect on substance abuse. The effects of extended intervention on high school completion were completely explained by 5HM and nearly so for on-time graduation (a percent reduction of 73.6%). Alternatively, 5HM accounted for only 26% of the main effect of school-age intervention on on-time high school graduation. Note that mediation was assessed only for those main effects showing statistical significance.

Table S14 shows the standardized coefficients for the full model that included all 5HM indicators. The first set of coefficients show the direct effects on the mediators of three measures of CPC participation adjusted for differences in the covariates. CPC preschool participation had relatively large effects on the ITBS cognitive composite (coeff. = 0.28), ITBS reading achievement (coeff. = 0.15), parent involvement in school (coeff. = 0.15), and classroom social adjustment (coeff. = 0.13). School-age participation had relatively large effects on parent involvement in school (coeff. = 0.24), school mobility (coeff. = -0.12), and special education/grade retention (coeff. = -0.10). Extended intervention for 4 to 6 years was significantly linked to parent involvement in school (coeff. = 0.32), school mobility (coeff. = -0.19), ITBS reading achievement (coeff. = 0.16), and school quality (coeff. = 0.14).

The second set of coefficients in Table S14 shows the direct effects of the mediators on five outcomes controlling for other mediators, CPC participation, and the covariates. The most common predictors of adult well-being were juvenile arrest, high school completion by age 21, school quality, child abuse and neglect, and special education placement/grade retention (see also Table S13). Trouble making behavior, parent involvement in school, social adjustment, motivation, and school commitment had less consistent direct effects, although given their earlier ages of assessment, influences also may be exerted indirectly through other mediators. Similarly, the effects of the cognitive composite at age 5 and ITBS reading achievement also would be expected to influence adult outcomes indirectly, especially the cognitive composite. Overall, these findings help corroborate the validity of the main effect estimates.

## 2.7. Findings in Context

Results should be interpreted within the context of two limitations. First, because the sample was almost all African American and grew up in inner-city Chicago, results may have

limited generalizability to samples with different racial compositions or social contexts. The long history of successful implementation within public schools also indicates that findings should not be expected to generalize to less intensive or lower-quality programs. Alternatively, generalizability is greater than many previous studies in that the program has been implemented routinely within a large public school context for over 4 decades. That many subgroup attributes showed no differences and that findings of other studies of universal programs show benefits is relevant.

A second limitation is that coverage of some outcome measures was limited. Because socioeconomic status stabilizes after age 30 (29, 70, 71), the assessed outcomes may not provide the optimal gauge of economic well-being. Health insurance coverage was assessed cumulatively up to age 26. The age of measurement and coverage period for health insurance coverage varied by participant and was not taken into account. More precise indicators such as the number of months of coverage over particular time intervals would provide valuable information on duration of coverage. Moreover marital and family status had more missing data than other outcomes. These outcomes are dynamic and will vary by age. Further follow-up to the transition to midlife will provide a more comprehensive profile (70).

Of further note is that while inferences based on quasi-experiments are more challenging than well executed experiments, our findings that estimated program effects were consistent across a range of approaches and specifications substantially reduces the plausibility of selection or attrition bias. These findings are consistent with prior studies (11, 15, 17) and with increasing evidence that generative mechanisms associated with the five-hypothesis model of intervention effects can account for the observed pattern of findings. This is part of the confirmatory approach of impact assessment (18, 28).

Findings strengthen knowledge on early childhood preventive interventions. As the first study of a school-based public early intervention into the mid to late 20s, results indicate that intensive educational enrichment can have enduring effects on socioeconomic status, health, and social behavior. They also extend on many prior studies including up to age 24 (11, 15, 23). The most consistent effects were for socioeconomic status including occupational prestige--a measure of job skills, an index of education and income, and income. Both preschool and extended intervention from preschool to second or third grade demonstrated positive effects on economic well-being while school-age intervention impacted only school completion and public aid receipt. Because the avoidable annual costs of crime (72, 73), school dropout (74), substance abuse, and mental health problems (75) exceed \$500 billion, our findings strengthen the evidence that sustained, publicly-funded early educational interventions can be among the most cost-effective strategies for promoting health and well-being. Continued investigation of the CPC program will address the extent to which participation affects a broader set of health behaviors such as chronic disease risk, use of preventive services, health behaviors, and subjective well-being.

The findings indicated that children at higher levels of risk benefitted more from preschool on several adult outcomes. Males (almost all of whom are African American), participants whose parents were high school dropouts, and participants with four or more demographic risks had higher rates of school completion and health compromising behaviors than their lower-risk counterparts. These findings suggest that early interventions can reduce health disparities among socioeconomic and demographic groups, especially if they impact educational success, a key determinant of health and well-being (76-79). These findings demonstrate that the Healthy People 2010 and 2020 goals of increasing quality and years of healthy life and eliminating health disparities (80, 81) can be achieved in part through participation in quality educational programs (76, 82). The comparative advantage found for children at higher levels of risk is consistent with

many of other studies of preventive interventions for children and youth (51, 79, 83, 84). The fact that females benefitted from school-age and extended intervention more than males suggests that differential effects by subgroup may vary by age of services and outcome. In the current study and in contrast to findings for preschool males, the advantage for females for the school-age program was largely due to the reduction in effects for males rather than a large increase for females. For example, the adjusted mean differences were not significant for males and marginally so for females (Table S11). This pattern also did not generalize to other outcomes. It is possible that more complex or higher order interactions involving program, child, and family characteristics are present and are difficult to reliably estimate.

The study also shows the potential limits of the long-term effects of dosage (length) within program components. Although extended intervention for 4 to 6 years (from preschool to third grade) demonstrated positive effects on adult well-being, the number of years of preschool (2 vs. 1) and extended (5 or 6 vs. 4) intervention were unrelated to adult outcomes. For school-age intervention, 2 to 3 years was linked to significantly higher rates of on-time high school graduation. This latter finding is consistent with school-age class size reduction experiments (83, 85) and social skills training (86, 87). These results overall suggest that among high quality programs there may be a threshold beyond which effect sizes diminish or are less likely to be observed. Nevertheless, in previous studies CPC dosage levels were associated with improved child and adolescent well-being. Two years of preschool relative to one year was linked to significantly higher school readiness skills, lower rates of remedial education, and lower rates of child maltreatment and juvenile delinquency (88, 89). Extended intervention for 5 to 6 years relative to 4 years was associated with higher school achievement by age 15, lower rates of child maltreatment, and lower rates of remedial education (5, 15, 20). Investigation of a broader set of adult outcomes and among child and family subgroups will help clarify the extent of dosage effects.

Finally, the findings illustrate the value of identifying effective educational and behavior interventions for promoting life-course well-being. As a comprehensive center-based educational intervention in public schools, the CPC model emphasizes the development of literacy and social skills necessary for school success and intensive family involvement in children's early learning. These features plus implementation by certified teachers in small classes for over 540 hours per year in preschool with continuing services in elementary school are key elements that distinguish the program from others that do not show broad and enduring effects into adulthood (51, 52, 64). While comparative effectiveness research in national health care reforms is emphasized in the Patient Protection and Affordable Care Act of 2009, applications to prevention programs for young people from birth to high school would advance knowledge on enhancing the cost-effectiveness of services that annually exceed \$600 billion (90). For example, the estimated cost-effectiveness of the CPC program is high (51, 52) as are other early childhood interventions (61, 91). However, many new and promising approaches have not been fully investigated and the organization of program investments across ages to promote better synergy in effectiveness and cost-effectiveness is in the early stages.

### 3. References

1. A. J. Reynolds, A Structural Model of 1st-Grade Outcomes for an Urban, Low Socioeconomic-Status, Minority Population. *J Educ Psychol* **81**, 594 (1989).
2. A. J. Reynolds, Educational success in high-risk settings: Contributions of the Chicago Longitudinal Study. *J School Psychol* **37**, 345 (1999).
3. Chicago Longitudinal Study, "Chicago Longitudinal Study: User's guide" (University of Minnesota, Institute of Child Development, Minneapolis, 2005).
4. A. J. Reynolds, S. Ou, Early childhood to young adulthood: An introduction to the special issue. *Child Youth Serv Rev* **32**, 1045 (2010).
5. A. J. Reynolds, *Success in early intervention : the Chicago child parent centers*. Child, youth, and family services. (University of Nebraska Press, Lincoln, Neb., 2000), pp. xxviii, 261 p.
6. A. J. Reynolds, J. A. Temple, B. A. White, S. Ou, D. L. Robertson, Age 26 Cost-Benefit Analysis of the Child-Parent Center Early Education Program. *Child Dev* **82**, 379 (2011).
7. A. J. Reynolds, N. Bezruczko, School adjustment of children at risk through fourth grade. *Merrill-Palmer Quarterly: Journal of Developmental Psychology* **39**, 457 (1993).
8. A. J. Reynolds, Effects of a Preschool Plus Follow-on Intervention for Children at Risk. *Dev Psychol* **30**, 787 (1994).
9. J. A. Temple, A. J. Reynolds, School mobility and achievement: Longitudinal findings from an urban cohort. *J School Psychol* **37**, 355 (1999).
10. E. A. Mann, A. J. Reynolds, Early intervention and juvenile delinquency prevention: Evidence from the Chicago Longitudinal Study. *Soc Work Res* **30**, 153 (2006).
11. A. J. Reynolds *et al.*, Effects of a school-based early childhood intervention on adult health and well-being: A 19-year follow-up of low-income families. *Arch Pediat Adol Med* **161**, 730 (2007).
12. S. Ou, A. J. Reynolds, Predictors of educational attainment in the Chicago Longitudinal Study. *School Psychol Quart* **23**, 199 (2008).
13. J. Topitzes, O. Godes, J. P. Mersky, S. Ceglarek, A. J. Reynolds, Educational Success and Adult Health: Findings from the Chicago Longitudinal Study. *Prev Sci* **10**, 175 (2009).
14. F. A. Campbell, C. T. Ramey, E. Pungello, J. Sparling, S. Miller-Johnson, Early childhood education: Young adult outcomes from the Abecedarian Project. *Applied Developmental Science* **6**, 42 (2002).
15. A. J. Reynolds, J. A. Temple, D. L. Robertson, E. A. Mann, Long-term effects of an early childhood intervention on educational achievement and juvenile arrest - A 15-year follow-up of low-income children in public schools. *Jama-J Am Med Assoc* **285**, 2339 (2001).
16. S. L. Ramey *et al.*, "Head Start children's entry into public school: A report on the National Head Start/Public School Early Childhood Transition Demonstration Study: Executive summary" (2000).
17. A. J. Reynolds, J. A. Temple, Quasi-experimental estimates of the effects of a preschool Intervention: Psychometric and econometric comparisons. *Evaluation Rev* **19**, 347 (1995).
18. A. J. Reynolds, Confirmatory program evaluation: Applications to early childhood interventions. *Teachers College Record* **107**, 2401 (2005).
19. A. J. Reynolds, S. Ou, J. W. Topitzes, Paths of effects of early childhood intervention on educational attainment and delinquency: a confirmatory analysis of the Chicago Child-

- Parent Centers. *Child Dev* **75**, 1299 (2004).
20. A. J. Reynolds, J. A. Temple, Extended early childhood intervention and school achievement: Age thirteen findings from the Chicago Longitudinal Study. *Child Dev* **69**, 231 (1998).
  21. P. Cummings, Propensity scores. *Arch Pediatr Adolesc Med* **162**, 734 (2008).
  22. G. W. Imbens, J. M. Wooldridge, Recent developments in the econometrics of program evaluation. *Journal of Economic Literature* **47**, 5 (2009).
  23. A. J. Reynolds, J. A. Temple, D. L. Robertson, E. A. Mann, Age 21 cost-benefit analysis of the Title I Chicago Child-Parent Centers. *Educational Evaluation and Policy Analysis* **24**, 267 (2002).
  24. L. M. Sullivan, *Let us not underestimate the children*. (Scott Foreman & Co., Glenview, IL, 1971).
  25. W. T. Miedel, A. J. Reynolds, Parent Involvement in Early Intervention for Disadvantaged Children: Does It Matter? *J School Psychol* **37**, 379 (1999).
  26. U.S. General Accounting Office, "Education and care: Early childhood programs and services for low-income families" (Washington, DC, 1999).
  27. S. Ou, Pathways of long-term effects of an early intervention program on educational attainment: Findings from the Chicago longitudinal study. *J Appl Dev Psychol* **26**, 578 (2005).
  28. A. J. Reynolds, S. Ou, Paths of Effects From Preschool to Adult Well-Being: A Confirmatory Analysis of the Child-Parent Center Program. *Child Dev* **82**, 555 (2011).
  29. M. E. Lachman, K. M. Firth, in *How healthy are we? A national study of well-being in midlife*, O. G. Brim, C. D. Ryff, R. C. Kessler, Eds. (University of Chicago Press, Chicago, IL, 2004), pp. 320-349.
  30. M. G. Marmot, R. Fuhrer, in *How healthy are we? A national study of well-being at midlife*, O. G. Brim, C. D. Ryff, R. C. Kessler, Eds. (University of Chicago Press, Chicago, IL, 2004), pp. 64-89.
  31. Illinois Shared Enrollment and Graduation Information Consortium. (Southern Illinois University, Carbondale, IL, 2007).
  32. J. Davis, T. Smith, R. Hodge, K. Nakao, J. Treas, "Occupational prestige ratings from the 1989 General Survey" (Inter-university Consortium for Political and Social Research, Ann Arbor, MI, 1991).
  33. W. Barratt, "The Barratt simplified measure of social status (BSMSS): Measuring SES" (Department of Educational Leadership, Administration, and Foundations, Indiana State University, Terre Haute, IN, 2005).
  34. A. B. Hollingshead. (Yale University, New Haven, CT, 1957).
  35. A. B. Hollingshead. (Yale University, New Haven, CT, 1975).
  36. Chapin Hall Center for Children. (University of Chicago, Chicago, IL, 2008).
  37. I. Arteaga, C. Chen, A. J. Reynolds, Childhood predictors of adult substance abuse. *Child Youth Serv Rev* **32**, 1108 (2010).
  38. StataCorp LP., *Stata user's guide : release 11*. (StataCorp LP, College Station, Tex., 2009), pp. x, 396 p.
  39. K. Hirano, G. W. Imbens, G. Ridder, Efficient estimation of average treatment effects using the estimated propensity score. *Econometrica* **71**, 1161 (2003).
  40. T. Kurth *et al.*, Results of multivariable logistic regression, propensity matching, propensity adjustment, and propensity-based weighting under conditions of nonuniform effect. *Am J Epidemiol* **163**, 262 (2006).
  41. J. M. Robins, M. A. Hernan, B. Brumback, Marginal structural models and causal

- inference in epidemiology. *Epidemiology* **11**, 550 (2000).
42. M. Caliendo, S. Kopeinig, Some practical guidance for the implementation of propensity score matching. *Journal of Economic Surveys* **22**, 31 (2008).
  43. I. Arteaga, University of Minnesota (2010).
  44. J. M. Robins, A. Rotnitzky, Semiparametric Efficiency in Multivariate Regression Models with Missing Data. *Journal of the American Statistical Association* **90**, 122 (1995).
  45. R. J. Sampson, P. Sharkey, S. W. Raudenbush, Durable effects of concentrated disadvantage on verbal ability among African-American children. *P Natl Acad Sci USA* **105**, 845 (2008).
  46. Q. Li, J. S. Racine, J. M. Wooldridge, Estimating Average Treatment Effects with Continuous and Discrete Covariates: The Case of Swan-Ganz Catheterization. *The American Economic Review* **98**, 357 (2008).
  47. J. A. Temple, I. Arteaga, A. J. Reynolds, “Longer-term effects of preschool for urban children: Results from the Chicago Longitudinal Study” (Minneapolis, MN, 2010).
  48. J. M. Robins, A. Rotnitzky, L. P. Zhao, Analysis of Semiparametric Regression-Models for Repeated Outcomes in the Presence of Missing Data. *Journal of the American Statistical Association* **90**, 106 (1995).
  49. D. O. Scharfstein, A. Rotnitzky, J. M. Robins, Adjusting for nonignorable drop-out using semiparametric nonresponse models. *Journal of the American Statistical Association* **94**, 1096 (1999).
  50. L. A. Karoly, M. R. Kilburn, J. S. Cannon, *Early childhood interventions: proven results, future promise*. (RAND Corporation, Santa Monica, CA, 2005).
  51. A. J. Reynolds, J. A. Temple, Cost-effective early childhood development programs from preschool to third grade. *Annu Rev Clin Psycho* **4**, 109 (2008).
  52. J. A. Temple, A. J. Reynolds, Benefits and costs of investments in preschool education: Evidence from the Child-Parent Centers and related programs. *Economics of Education Review* **26**, 126 (2007).
  53. L. J. Schweinhart, *Lifetime effects : the High/Scope Perry preschool study through age 40*. (High/Scope Press, Ypsilanti, Mich., 2005), pp. xvii, 239 p.
  54. K. Burger, How does early childhood care and education affect cognitive development? An international review of the effects of early interventions for children from different social backgrounds. *Early Child Res Q* **25**, 140 (2010).
  55. G. Camilli, S. Vargas, S. Ryan, W. S. Barnett, Meta-Analysis of the Effects of Early Education Interventions on Cognitive and Social Development. *Teachers College Record* **112**, 579 (2010).
  56. M. Manning, R. Homel, C. Smith, A meta-analysis of the effects of early developmental prevention programs in at-risk populations on non-health outcomes in adolescence. *Child Youth Serv Rev* **32**, 506 (2010).
  57. E. C. Melhuish *et al.*, Preschool Influences on Mathematics Achievement. *Science* **321**, 1161 (2008).
  58. W. T. Gormley, D. Phillips, T. Gayer, Preschool Programs Can Boost School Readiness. *Science* **320**, 1723 (2008).
  59. Administration for Children and Families, “Research to practice: Preliminary findings from the Early Head Start Prekindergarten followup” (U.S. Department of Health and Human Services, Washington, DC, 2006).
  60. Administration for Children and Families, “Head Start Impact Study. Final Report.” (U.S. Department of Health and Human Services, Washington, DC, 2010).

61. A. J. Reynolds, A. J. Rolnick, M. M. Englund, J. A. Temple, Eds., *Childhood programs and practices in the first decade of life : a human capital integration*, (Cambridge University Press, New York, 2010), pp. xxiii, 518 p.
62. R. B. McCall, L. Larsen, A. Ingram, in *Early childhood programs for a new century*, A. J. Reynolds, M. C. Wang, H. J. Walberg, Eds. (CWLA Press, Washington, DC, 2003), pp. 255-298.
63. G. J. August, A. Gewirtz, G. M. Realmuto, Moving the field of prevention from science to service: Integrating evidence-based preventive interventions into community practice through adapted and adaptive models. *Applied and Preventive Psychology*, **In Press**.
64. M. Nation *et al.*, What works in prevention - Principles of effective prevention programs. *Am Psychol* **58**, 449 (2003).
65. M. C. McCormick *et al.*, Early intervention in low birth weight premature infants: Results at 18 years of age for the infant health and development program. *Pediatrics* **117**, 771 (2006).
66. D. L. Johnson, J. Blumenthal, The Parent Child Development Centers and School Achievement: A Follow-Up. *The Journal of Primary Prevention* **25**, 195 (2004).
67. J. R. Lally, P. L. Mangione, A. S. Honig, D. S. Wittner, More pride, less delinquency: Findings from the ten-year follow-up study of the Syracuse Family Development Research Program. *Zero to Three* **8**, 13 (1988).
68. R. Chazan-Cohen *et al.*, It takes time: Impacts of early head start that lead to reductions in maternal depression two years later. *Infant Ment Health J* **28**, 151 (2007).
69. Consortium for Longitudinal Studies., *As the twig is bent--lasting effects of preschool programs*. (L. Erlbaum Associates, Hillsdale, N.J., 1983), pp. xiii, 494 p.
70. O. G. Brim, C. D. Ryff, R. C. Kessler, *How healthy are we? A national study of well-being in midlife*. O. G. Brim, C. D. Ryff, R. C. Kessler, Eds., (University of Chicago Press., Chicago, IL, 2004).
71. A. E. Barrett, Socioeconomic status and age identity: the role of dimensions of health in the subjective construction of age. *J Gerontol B Psychol Sci Soc Sci* **58**, S101 (2003).
72. M. Cohen, The monetary value of saving a high-risk youth. *Journal of Quantitative Criminology* **14**, 5 (1998).
73. M. A. Cohen, "The costs of crime and justice." (Routledge, New York, NY, 2005).
74. J. C. Day, E. C. Newburger, "The Big Payoff: Educational Attainment and Synthetic Estimates of Work-Life Earnings. Special Studies. Current Population Reports" (2002).
75. M. E. O'Connell, T. Boat, K. E. Warner, *Preventing mental, emotional and behavioral disorders among young people: Progress and possibilities.*, (National Academies Press, Washington, DC, 2009).
76. P. Braveman, C. Barclay, Health disparities beginning in childhood: a life-course perspective. *Pediatrics* **124 Suppl 3**, S163 (2009).
77. C. R. Belfield, H. M. Levin, Eds., *The price we pay: Economic and social consequences of inadequate education*, (Brookings, Washington, DC, 2007).
78. M. Ver Ploeg, E. Perrin, Eds., *Eliminating health disparities: Measurement and data needs.*, (National Academies Press, Washington, DC, 2004).
79. W. J. Wilson, *More than just race: Being black and poor in the inner city.*, (W. W. Norton & Company, Inc, New York, NY, 2009).
80. U. S. Department of Health and Human Services, "Healthy people in healthy communities: A community planning guide using Healthy People 2010." (Office of Disease Prevention and Health Promotion, Washington, DC, 2001).
81. U. S. Department of Health and Human Services, "Healthy People 2020: An Opportunity

- to Address Societal Determinants of Health in the U.S. ” (Secretary's advisory committee on national health promotion and disease prevention objectives for 2020, Washington, DC, 2010).
82. B. Guyer *et al.*, Early childhood health promotion and its life course health consequences. *Acad Pediatr* **9**, 142 (2009).
  83. J. D. Finn, S. B. Gerber, J. Boyd-Zaharias, Small classes in the early grades, academic achievement, and graduating from high school. *J Educ Psychol* **97**, 214 (2005).
  84. J. J. Heckman, J. Stixrud, S. Urzua, The effects of cognitive and noncognitive abilities on labor market outcomes and social behavior. *Journal of Labor Economics* **24**, 411 (2006).
  85. S. Aos, M. Miller, J. Mayfield, “Benefits and costs of K-12 education policies: Evidence-based effects of class size reductions and full-day kindergarten.” (Washington State Institute for Public Policy, Olympia, WA, 2007).
  86. J. D. Hawkins, R. F. Catalano, R. Kosterman, R. Abbott, K. G. Hill, Preventing adolescent health-risk behaviors by strengthening protection during childhood. *Arch Pediatr Adolesc Med* **153**, 226 (1999).
  87. J. D. Hawkins, R. Kosterman, R. F. Catalano, K. G. Hill, R. D. Abbott, Effects of social development intervention in childhood 15 years later. *Arch Pediatr Adolesc Med* **162**, 1133 (2008).
  88. A. J. Reynolds, L. C. Mathieson, J. W. Topitzes, Do Early Childhood Interventions Prevent Child Maltreatment? A Review of Research. *Child Maltreatment* **14**, 182 (2009).
  89. A. J. Reynolds, One-Year of Preschool Intervention or 2 - Does It Matter. *Early Child Res Q* **10**, 1 (1995).
  90. National Science and Technology Council, “Investing in our future: A national research initiative for America's children for the 21st century” (Executive Office of the President, Office of Science and Technology Policy, Committee on Fundamental Science, and the Committee on Health, Safety, and Food, Washington, DC, 1997).
  91. A. Rolnick, R. Grunewald, “Early childhood development: economic development with a high public return. ” (Federal Reserve Bank of Minneapolis, 2003).
  92. M. Huber. Identification of average treatment effects in social experiments under different forms of attrition. *Journal of Educational and Behavioral Statistics*, **In Press**.

#### 4. Supplementary Tables

Table S1a. Patterns of Participation of Original Intervention and Comparison Groups in the CLS

| Study category                                                                           | Total Sample | Preschool Intervention Group* | Comparison Group* |
|------------------------------------------------------------------------------------------|--------------|-------------------------------|-------------------|
| <b>Program Participants' Characteristics at Start of Study**</b>                         |              |                               |                   |
| Original Sample                                                                          | 1539         | 989                           | 550               |
| No. of cases with preschool participation                                                | 1073         | 989                           | 84                |
| No. of cases with CPC preschool                                                          | 989          | 989                           | 0                 |
| Years in CPC preschool (0-2)                                                             | 0.99         | 1.55                          | 0.0               |
| No. of cases with Head Start preschool                                                   | 85           | 1                             | 84                |
| No. of cases with kindergarten participation                                             | 1539         | 989                           | 550               |
| No. of cases with CPC participation                                                      | 989          | 989                           | 0                 |
| Full-day kindergarten, %                                                                 | --           | 59.9                          | 100.0             |
| No. of cases with CPC school-age participation                                           | 850          | 684                           | 166               |
| Years of school-age program (0-3)                                                        | 1.16         | 1.43                          | 0.68              |
| School-age participation, %                                                              | --           | 69.2                          | 30.2              |
| No. of cases with CPC extended intervention (4-6 y)                                      | 553          | 553                           | 0                 |
| Extended participation, %                                                                | --           | 55.9                          | 0.0               |
| Total years of CPC program (0-6)                                                         | 2.78         | 3.95                          | 0.68              |
| No. of cases with no CPC participation                                                   | 384          | 0                             | 384               |
| <b>No. of Lost cases in Post-program Years</b>                                           |              |                               |                   |
| Moved***                                                                                 |              |                               |                   |
| From ages 6-10 y                                                                         | 69           | 41                            | 28                |
| After age 10 y                                                                           | 52           | 30                            | 22                |
| Deceased                                                                                 | 50           | 33                            | 17                |
| <b>Follow-up Study Characteristics of Participants by Age 28, No. of cases with data</b> |              |                               |                   |
| Educational attainment/employment                                                        | 1386         | 900                           | 486               |
| Public aid                                                                               | 1335         | 868                           | 467               |
| Crime and justice system involvement                                                     | 1473         | 950                           | 523               |
| Socioeconomic status                                                                     | 1265         | 821                           | 444               |
| Health insurance                                                                         | 1304         | 850                           | 454               |
| Family status                                                                            | 1233         | 808                           | 425               |
| One or more outcomes                                                                     | 1486         | 957                           | 529               |
| Two or more outcomes                                                                     | 1458         | 939                           | 519               |
| Three or more outcomes                                                                   | 1400         | 909                           | 491               |

\*Cases for program participation cover the 6-year period (1983-1989) that defines enrollment in the CPC intervention.

\*\*The CPC preschool comparison group participated in a full-day kindergarten program, and 84 participated in Head Start preschool. 109 parents in the comparison group reported their child participated in other child care/education in preschool. 176 cases in the comparison group were eligible to receive limited services in the CPC kindergarten but enrolled in different classrooms. They are not part of the original CPC intervention group. Some cases in the comparison group participated in the school-age program because it was open to any child enrolled in elementary school from first to third grade. Fifteen children in the CPC intervention group enrolled in the alternative full-day kindergarten.

\*\*\*These categories account for attrition from the original study sample of 1,539. Cases were lost during post-program years because they moved from Chicago and could not be located, were deceased, or either did not have sufficient identifying information to track, refused to participate or were incarcerated (other). At age 28, the total number of deceased cases in the study was 50. The attrition sample (cases lost in post-program years) of 153 had missing data on educational attainment and employment between ages 24 and 27.

Table S1b. Patterns of Participation of School-Age and Extended Intervention Groups in the CLS

| Study category                                                                           | Total Sample | School-age Intervention Group* | Comparison Group* | Total Sample | Extended Intervention Group | Prek+K comparison Group |
|------------------------------------------------------------------------------------------|--------------|--------------------------------|-------------------|--------------|-----------------------------|-------------------------|
| <b>Program Participants' Characteristics at Start of Study**</b>                         |              |                                |                   |              |                             |                         |
| Original Sample                                                                          | 1234         | 850                            | 384               | 989          | 553                         | 436                     |
| No. of cases with preschool participation                                                | 877          | 731                            | 146               | 989          | 553                         | 436                     |
| No. of cases with CPC preschool                                                          | 684          | 684                            | 0                 | 989          | 553                         | 436                     |
| Years in CPC preschool (0-2)                                                             | 0.86         | 1.25                           | 0                 | 1.54         | 1.56                        | 1.52                    |
| No. of cases with Head Start preschool                                                   | 85           | 5                              | 80                | 1            | 1                           | 0                       |
| No. of cases with kindergarten participation                                             | 1234         | 850                            | 384               | 989          | 553                         | 436                     |
| No. of cases with CPC participation                                                      | 684          | 684                            | 0                 | 989          | 553                         | 436                     |
| Full-day kindergarten, %                                                                 | 76.4         | 65.8                           | 100               | 59.9         | 56.8                        | 63.8                    |
| No. of cases with CPC school-age participation                                           | 850          | 850                            | 0                 | 684          | 553                         | 131                     |
| Years of school-age program (0-3)                                                        | 1.45         | 2.10                           | 0                 | 1.43         | 2.31                        | 0.31                    |
| School-age participation, %                                                              | 68.9         | 100                            | 0                 | 69.2         | 100                         | 30                      |
| No. of cases with CPC extended intervention (4-6 y)                                      | 553          | 553                            | 0                 | 553          | 553                         | 0                       |
| Extended participation, %                                                                | --           | 65.1                           | 0                 | --           | 100                         | 0                       |
| Total years of CPC program (0-6)                                                         | 2.85         | 4.14                           | 0                 | 3.95         | 4.86                        | 2.80                    |
| No. of cases with no CPC participation                                                   | 384          | 0                              | 384               | 0            | 0                           | 0                       |
| <b>No. of Deceased cases</b>                                                             |              |                                |                   |              |                             |                         |
| Deceased                                                                                 | 40           | 29                             | 11                | 33           | 14                          | 19                      |
| <b>Follow-up Study Characteristics of Participants by Age 28, No. of cases with data</b> |              |                                |                   |              |                             |                         |
| Educational attainment/employment                                                        | 1111         | 774                            | 337               | 898          | 515                         | 383                     |
| Public aid                                                                               | 1085         | 755                            | 330               | 868          | 513                         | 355                     |
| Crime and justice system involvement                                                     | 1189         | 826                            | 363               | 950          | 543                         | 407                     |
| Socioeconomic status                                                                     | 1020         | 709                            | 311               | 821          | 471                         | 350                     |
| Health insurance                                                                         | 1047         | 727                            | 320               | 850          | 488                         | 362                     |
| Family status                                                                            | 985          | 687                            | 298               | 808          | 462                         | 346                     |

Table S1b. Patterns of Participation of School-Age and Extended Intervention Groups in the CLS (Continued)

| Study category         | Total Sample | School-age Intervention Group* | Comparison Group* | Total Sample | Extended Intervention Group | Prek+K comparison Group |
|------------------------|--------------|--------------------------------|-------------------|--------------|-----------------------------|-------------------------|
| One or more outcomes   | 1199         | 831                            | 368               | 957          | 545                         | 412                     |
| Two or more outcomes   | 1176         | 815                            | 361               | 939          | 540                         | 399                     |
| Three or more outcomes | 1130         | 788                            | 342               | 909          | 528                         | 381                     |

\*Cases for program participation cover the 6-year period (1983-1989) that defines enrollment in the CPC intervention. The comparison group did not participate in any CPC intervention. The 305 cases with preschool participation but no school-age participation are excluded for the school-age comparison group. Because extended intervention required preschool participation, the original sample size for the extended group is 989. The Prek+K comparison group did not participate in school-age intervention.

\*\*The CPC school-age comparison group participated in a full-day kindergarten program, and 80 participated in Head Start preschool. 66 parents in the comparison group reported their child participated in other child care/education in preschool. 42 parents in the school-age intervention group reported their child participated in other child care/education in preschool, and 66 parents in the comparison group reported their child participated in other child care/education in preschool.

\*\*\*These categories account for attrition from the original study sample of 1,539. Cases were lost during post-program years because they moved from Chicago and could not be located, were deceased, or either did not have sufficient identifying information to track, refused to participate or were incarcerated (other). At age 28, the total number of deceased cases in the study was 50. The attrition sample (cases lost in post-program years) of 153 had missing data on educational attainment and employment between ages 24 and 27.

Table S2a. Equivalence of CPC Preschool Intervention and Comparison Groups on Preprogram Attributes for the Age 28 Follow-up Study (N=1,386)

| Child/Family Characteristics**                       | Age 28 Follow-up Sample*                      |                           |            | Male               | Original                       | With                     |
|------------------------------------------------------|-----------------------------------------------|---------------------------|------------|--------------------|--------------------------------|--------------------------|
|                                                      | Preschool<br>Intervention<br>Group<br>(N=900) | Comp.<br>Group<br>(N=486) | P<br>value | Only<br>P<br>value | Sample (n<br>= 1539 P<br>value | covariates<br>P<br>value |
| Sample recovery, %                                   | 91.0                                          | 88.4                      | --         | .650               | .109                           | --                       |
| Adult administrative records, %                      | 92.7                                          | 93.8                      | .440       | .126               | .933                           | .557                     |
| African American child, %                            | 93.3                                          | 93.0                      | .823       | .359               | 1.00                           | .257                     |
| Female child, %                                      | 53.9                                          | 47.7                      | .032       | --                 | .109                           | .085                     |
| Low birth weight (<2500g), %                         | 11.7                                          | 14.5                      | .141       | .697               | .134                           | .323                     |
| Home environment problems ages 0-5                   | 0.19                                          | 0.14                      | .124       | .070               | .118                           | .088                     |
| Complication of pregnancy or with labor, %           | 11.2                                          | 10.5                      | .719       | .297               | .439                           | .637                     |
| Reside in high poverty school area, % <sup>xz</sup>  | 77.8                                          | 73.0                      | .055       | .318               | .040                           | .109                     |
| Reside in high poverty neighborhood, %               | 59.3                                          | 40.1                      | .000       | .000               | .000                           | .000                     |
| Child welfare case histories by age 4, %             | 3.1                                           | 5.2                       | .068       | .122               | .069                           | .085                     |
| Mother under age 18 at child birth, % <sup>x</sup>   | 16.4                                          | 18.4                      | .364       | .213               | .695                           | .541                     |
| Mother completed high school, % <sup>x</sup>         | 49.4                                          | 41.2                      | .004       | .167               | .001                           | .018                     |
| Mother had some college at child birth, %            | 13.8                                          | 10.9                      | .124       | .469               | .072                           | .048                     |
| Father completed high school at birth, %             | 62.5                                          | 59.7                      | .468       | .405               | .317                           | .972                     |
| Father had some college at child birth, %            | 20.0                                          | 15.3                      | .154       | .400               | .145                           | .165                     |
| Single parent family status, % <sup>x</sup>          | 76.3                                          | 74.8                      | .593       | .451               | .613                           | .958                     |
| Mother not employed, % <sup>x</sup>                  | 64.7                                          | 59.4                      | .073       | 1.00               | .123                           | .120                     |
| Child eligible for subsidized meals, % <sup>xy</sup> | 83.2                                          | 82.3                      | .703       | .836               | .384                           | .982                     |
| Participate in AFDC program, % <sup>x</sup>          | 62.5                                          | 60.3                      | .441       | .616               | .609                           | .685                     |
| Four or more children in family, % <sup>x</sup>      | 16.5                                          | 19.4                      | .201       | .743               | .281                           | .353                     |
| Missing 1 or more risk factors, %                    | 12.7                                          | 15.6                      | .141       | .104               | .035                           | .422                     |
| Risk index (0 to 8), mean (SD)                       | 4.51 (1.66)                                   | 4.50 (1.77)               | .960       | .338               | .802                           | .578                     |

\*The age 28 follow-up sample had known educational attainment by August 2008 or employment from 2004 to 2007. P values show the significance of mean (or percentage) group differences for age the 28 sample. The preschool comparison group participated in an alternative full-day kindergarten but had no CPC preschool participation.

\*\*Data on child and family characteristics were collected from birth to age 3 based on multiple administrative records and parent surveys. Data on AFDC (Aid to Families with Dependent Children) and subsidized school meals were collected up to age 8. Home environment problems considered were retrospective reports of frequent family conflict, substance abuse of parent, and family financial problems between ages 0-5. The measure ranges from 0 to 3. Sample sizes ranged from 1241 to 1386 (follow-up sample). The sample size for father's education is 709. They ranged from 1342 to 1539 for the original sample (not shown). X: Variable included in the risk index. Y: Eligibility defined at <130% of the federal poverty level. Z: High poverty is defined as residence in a school area in which 60% or more children live in families with low income.

Table S2b. Equivalence of CPC School-age Intervention and Comparison Groups on Pre-program Attributes for the Age 28 Follow-up Study (N=1,386)

| Child/Family Characteristics**                       | Age 28 Follow-up Sample*              |                     |                | Original Sample (n = 1539) <i>P</i> value | With covariates <i>P</i> Value |
|------------------------------------------------------|---------------------------------------|---------------------|----------------|-------------------------------------------|--------------------------------|
|                                                      | School-age Intervention Group (N=776) | Comp. Group (N=610) | <i>P</i> value |                                           |                                |
| Sample recovery, %                                   | 91.3                                  | 88.5                | --             | .086                                      | --                             |
| Adult administrative records, %                      | 93.4                                  | 92.6                | .595           | .042                                      | .157                           |
| African American child, %                            | 93.9                                  | 92.3                | .238           | .368                                      | .720                           |
| Female child, %                                      | 52.5                                  | 50.8                | .552           | .719                                      | .987                           |
| Low birth weight (<2500g), %                         | 12.9                                  | 12.3                | .803           | .873                                      | .926                           |
| Home environment problems ages 0-5                   | 0.19                                  | 0.15                | .140           | .137                                      | .166                           |
| Complication of pregnancy or with labor, %           | 10.3                                  | 11.8                | .388           | .508                                      | .383                           |
| Reside in high poverty school area, % <sup>xz</sup>  | 75.6                                  | 76.7                | .657           | .590                                      | .690                           |
| Reside in high poverty neighborhood, %               | 56.4                                  | 47.9                | .002           | .001                                      | .009                           |
| Child welfare case histories by age 4, %             | 3.8                                   | 3.8                 | 1.00           | 1.00                                      | .461                           |
| Mother under age 18 at child birth, % <sup>x</sup>   | 17.5                                  | 16.7                | .717           | 1.00                                      | .139                           |
| Mother completed high school, % <sup>x</sup>         | 48.8                                  | 43.7                | .061           | .093                                      | .021                           |
| Mother had some college at child birth, %            | 13.8                                  | 11.5                | .218           | .157                                      | .084                           |
| Father completed high school at birth, %             | 60.8                                  | 62.4                | .698           | .941                                      | .834                           |
| Father had some college at child birth, %            | 18.2                                  | 18.5                | .923           | .853                                      | .489                           |
| Single parent family status, % <sup>x</sup>          | 76.6                                  | 74.8                | .481           | .808                                      | .253                           |
| Mother not employed, % <sup>x</sup>                  | 64.3                                  | 60.9                | .235           | .457                                      | .960                           |
| Child eligible for subsidized meals, % <sup>xy</sup> | 83.3                                  | 82.3                | .660           | .673                                      | .902                           |
| Participate in AFDC program, % <sup>x</sup>          | 63.6                                  | 59.3                | .123           | .227                                      | .473                           |
| Four or more children in family, % <sup>x</sup>      | 16.6                                  | 18.8                | .312           | .678                                      | .437                           |
| Missing 1 or more risk factors, %                    | 11.6                                  | 16.4                | .012           | .000                                      | .933                           |
| Risk index (0 to 8), mean (SD)                       | 4.54 (1.66)                           | 4.50 (1.75)         | .864           | .623                                      | .127                           |

\*The age 28 follow-up sample had known educational attainment by August 2008 or employment from 2004 to 2007. *P* values show the significance of mean (or percentage) group differences for age 28 sample.

\*\*Data on child and family characteristics were collected from birth to age 3 based on multiple administrative records and parent surveys. Data on AFDC (Aid to Families with Dependent Children) and subsidized meals were collected up to age 8. Home environment problems considered were retrospective reports of frequent family conflict, substance abuse of parent, and family financial problems between ages 0-5. The measure ranges from 0 to 3. Sample sizes ranged from 1241 to 1386 (follow-up sample). The sample size for father's education is 709. They ranged from 1342 to 1539 for the original sample (not shown). X: Variable included in the risk index. Y: Eligibility defined at <130% of the federal poverty level. Z: High poverty is defined as residence in a school area in which 60% or more children live in families with low income.

Table S2c. Equivalence of CPC Extended Intervention and Comparison Groups on Preprogram Attributes for the Age 28 Follow-up Study (N=1,386)

| Child/Family Characteristics**                       | Age 28 Follow-up Sample*                     |                                      |            | Original                        | With                     |
|------------------------------------------------------|----------------------------------------------|--------------------------------------|------------|---------------------------------|--------------------------|
|                                                      | Extended<br>Intervention<br>Group<br>(N=516) | Less<br>Extended<br>Group<br>(N=870) | P<br>value | Sample<br>(n = 1539)<br>P value | covariates<br>P<br>value |
| Sample recovery, %                                   | 93.3                                         | 88.2                                 | --         | .001                            | --                       |
| Adult administrative records, %                      | 94.8                                         | 92.1                                 | .063       | .000                            | .973                     |
| African American child, %                            | 93.8                                         | 92.9                                 | .580       | 1.00                            | .449                     |
| Female child, %                                      | 55.0                                         | 49.8                                 | .059       | .079                            | .344                     |
| Low birth weight (<2500g), %                         | 11.3                                         | 13.5                                 | .268       | .364                            | .509                     |
| Home environment problems ages 0-5                   | 0.19                                         | 0.16                                 | .398       | .409                            | .375                     |
| Complication of pregnancy or with labor, %           | 10.5                                         | 11.3                                 | .722       | .864                            | .724                     |
| Reside in high poverty school area, % <sup>xz</sup>  | 76.9                                         | 75.6                                 | .603       | .576                            | .541                     |
| Reside in high poverty neighborhood, %               | 56.5                                         | 50.3                                 | .031       | .019                            | .035                     |
| Child welfare case histories by age 4, %             | 2.8                                          | 4.5                                  | .138       | .053                            | .279                     |
| Mother under age 18 at child birth, % <sup>x</sup>   | 15.8                                         | 18.0                                 | .333       | .171                            | .872                     |
| Mother completed high school, % <sup>x</sup>         | 51.6                                         | 43.5                                 | .005       | .002                            | .014                     |
| Mother had some college at child birth, %            | 15.7                                         | 11.1                                 | .014       | .004                            | .032                     |
| Father completed high school at birth, %             | 64.3                                         | 59.9                                 | .262       | .145                            | .847                     |
| Father had some college at child birth, %            | 19.8                                         | 17.5                                 | .481       | .385                            | .618                     |
| Single parent family status, % <sup>x</sup>          | 76.7                                         | 75.2                                 | .554       | .900                            | .996                     |
| Mother not employed, % <sup>x</sup>                  | 63.5                                         | 62.5                                 | .718       | .908                            | .990                     |
| Child eligible for subsidized meals, % <sup>xy</sup> | 82.7                                         | 82.9                                 | .941       | 1.00                            | .967                     |
| Participate in AFDC program, % <sup>x</sup>          | 62.7                                         | 61.2                                 | .602       | .780                            | .646                     |
| Four or more children in family, % <sup>x</sup>      | 16.5                                         | 18.2                                 | .460       | .830                            | .944                     |
| Missing 1 or more risk factors, %                    | 9.5                                          | 16.2                                 | .000       | .000                            | .462                     |
| Risk index (0 to 8), mean (SD)                       | 4.46 (1.68)                                  | 4.54 (1.72)                          | .383       | .133                            | .605                     |

\*The age 28 follow-up sample had known educational attainment by August 2008 or employment from 2004 to 2007. P values show the significance of mean (or percentage) group differences for the age 28 sample. The extended intervention group had 4 to 6 years of CPC services from preschool to second or third grade. The less extended intervention group had 0 to 4 years. This contrast defines extended intervention-1.

\*\*Data on child and family characteristics were collected from birth to age 3 based on multiple administrative records and parent surveys. Data on AFDC (Aid to Families with Dependent Children) and subsidized school meals were collected up to age 8. Home environment problems considered were retrospective reports of frequent family conflict, substance abuse of parent, and family financial problems between ages 0-5. The measure ranges from 0 to 3. Sample sizes ranged from 1241 to 1386 (follow-up sample). The sample size for father's education is 709. They ranged from 1342 to 1539 for the original sample (not shown). X: Variable included in the risk index. Y: Eligibility defined at <130% of the federal poverty level. Z: High poverty is defined as residence in a school area in which 60% or more children live in families with low income.

Table S3. Data Sources of Adult Outcomes by Age 28

| Adult outcomes                    | Data collected or obtained by: | Average age on this date | Data source                               |
|-----------------------------------|--------------------------------|--------------------------|-------------------------------------------|
| <i>Educational attainment</i>     | August 31, 2008                | 28.3                     | Survey <sup>1</sup> /Adm <sup>2</sup>     |
| <i>Socioeconomic status</i>       |                                |                          |                                           |
| Occupational prestige             | December 31, 2004              | 24.6                     | Survey <sup>1</sup> /Adm <sup>3</sup>     |
| SES and income                    | December 31, 2007              | 27.6                     | Survey <sup>1</sup> /Adm <sup>3</sup>     |
| Public aid                        | December 31, 2007              | 27.6                     | Adm <sup>4</sup>                          |
| <i>Health status and behavior</i> |                                |                          |                                           |
| Insurance                         | December 31, 2007              | 27.6                     | Survey <sup>1</sup> /Adm <sup>2 4 5</sup> |
| Substance abuse                   | December 31, 2007              | 27.6                     | Survey <sup>1</sup> /Adm <sup>5 6</sup>   |
| <i>Crime</i>                      | December 31, 2006              | 26.6                     | Survey <sup>1</sup> /Adm <sup>5 7</sup>   |
| <i>Family status</i>              | December 31, 2007              | 27.6                     | Survey <sup>1</sup> /Adm <sup>4</sup>     |

Note. The measures for educational attainment, justice system involvement, and family status were assessed at similar ages and thus are not shown.

1. Survey = CLS age 22/24 survey questionnaire.

2. Illinois Shared Enrollment and Graduation (ISEG) Consortium.

3. Illinois Department of Employment Security (IDES).

4. Illinois Public Assistance Data Base, Illinois Department of Health and Human Services, maintained at Chapin Hall Center for Children at the University of Chicago.

5. Cook County Circuit Court, Illinois.

6. Department of Motor Vehicles, Illinois.

7. State-level arrest data were obtained through manual online record searches of the Illinois Department of Corrections, the Wisconsin Circuit Court, the Iowa Courts, the Minnesota Department of Public Safety and the Minnesota Bureau of Criminal Apprehension primarily, as well as the Department of Corrections system from 15 other states. Federal-level records were collected from manual online record searches of The Federal Bureau of Prisons.

Table S4. Chicago Longitudinal Study Occupational Prestige Scale

| Code | Occupational Title                                                                                                                                                                                                                                                                                                                                                                                                                                                                                                                                                                                                                                                                                                                                                                                                                                                      | BSMSS Occupational Status Scores | Nakao-Treas Occupational Prestige Score |
|------|-------------------------------------------------------------------------------------------------------------------------------------------------------------------------------------------------------------------------------------------------------------------------------------------------------------------------------------------------------------------------------------------------------------------------------------------------------------------------------------------------------------------------------------------------------------------------------------------------------------------------------------------------------------------------------------------------------------------------------------------------------------------------------------------------------------------------------------------------------------------------|----------------------------------|-----------------------------------------|
| 1    | Dish washer or bus boy, car wash attendant or detailer, usher at a movie theater, chambermaid, parking lot attendant, garage or service station related occupations (e.g., lube technician, cashier, filler), janitor, telephone solicitor (e.g., telemarketer, telephone sales rep), housekeeper or homemaker at nursing home or temporary in-home care provider, supermarket clerk, stock handler or grocery bagger, fast food counter sales, cook or prep worker, driver-sales worker (e.g., pizza delivery driver), temporary or day laborer (e.g., mover, garbage sorter, non-machine operating packer).                                                                                                                                                                                                                                                           | 5                                | 0 - 23.99<br>Low                        |
| 2    | Bill or account collector, bartender, packing and filling machine operator, amusement or recreation facilities attendant, machinery maintenance occupations, loader, driver helper, package handler or sorter, baggage porter or ramp agent, stock or inventory clerk, shoe sales person, automotive parts sales person, garbage collector, price marker in a retail store, waiter, short-order cook, cab driver or chauffeur, light truck driver, assembly line worker, groundskeeper or gardener, carpenter apprentice or helper, building rehabilitation worker, private household child care worker (i.e. babysitter), private household unlicensed hairdresser or barber, salon assistant, library clerk, cashier at a supermarket or equivalent location (e.g., Target, Wal-Mart, Home Depot, Menards, Lowes, Walgreens).                                         | 10                               | 24 - 29.99                              |
| 3    | Heavy truck driver, bus driver, mail clerk or carrier for a private company (e.g., UPS), dispatcher, car rental agent, ticket agent at an airport, retail and apparel sales person, car sales person, cook in a restaurant, baker, delicatessen, hotel clerk or front desk attendant, sales counter or general office clerk, clerical assistant, office communications or copy machine operator, photo both operator, shipping and receiving clerk, construction or maintenance worker, mechanic apprentice or helper, meter reader, machine operator (e.g., forklift operator), production inspector, checker or examiner, barber, supervisor for food preparation or service occupations (e.g., fast food restaurant manager, janitorial engineer), tutor, child care worker or day care aide, except private household, un-certified nursing home aide or attendant. | 15                               | 30 - 35.99                              |
| 4    | Professional hairdresser or cosmetologist, skilled construction laborer, carpenter, automobile mechanic, electrician apprentice or helper, optical goods worker (e.g., lens grinder, lab tech), security guard, recreational worker (e.g., camp counselor, resident counselor, leader, lifeguard), student worker or intern (e.g. research assistant, teacher assistant), receptionist, loan processor, data entry clerk, customer service representative, advertising sales, production coordinator, facilities, hospital attendant, child care supervisor.                                                                                                                                                                                                                                                                                                            | 20                               | 36 - 41.99                              |
| 5    | Heating, air conditioning and refrigerator repair, not specified skilled mechanic or repairer, personnel training and labor relations specialist, dental assistant, administrative or executive assistant, professional secretary, bookkeeper or accounts receivable clerk, supervisor for sales and service occupations, bank teller, newspaper proofreader, religious worker, insurance sales person or broker, designer (e.g., interior decorator), musician, instructor (e.g., dance, computers) elementary school teacher aide, substitute teacher, mail carrier for US postal services, welfare services aide, certified nursing assistant.                                                                                                                                                                                                                       | 25                               | 42 - 47.99<br>Moderate                  |
| 6    | Technician (e.g., engineers assistant, pharmacy technician), financial officer (e.g., credit manager, income tax preparer, personal financial planner, underwriter), office manager (e.g., supervisor of telephone exchange branch), administrator (e.g., general manger or owner of a moving and storage company, fast food franchise, day care center), real estate agent, health diagnosing practitioner, hospital admissions officer, electrician, computer repairer, social worker, securities and financial services occupations, air craft mechanic, professionally trained librarian, disc jockey, pre-kindergarten or nursery school teacher, military enlisted personnel.                                                                                                                                                                                     | 30                               | 48 - 54.99                              |
| 7    | Legal assistant, counselor, health technologist or technician (e.g., x-ray technician), electrical technician, financial manager (e.g., bank manager), marketing, advertising or public relations manager, licensed practical nurse, police personnel, physical, occupational or speech therapist, computer programmer.                                                                                                                                                                                                                                                                                                                                                                                                                                                                                                                                                 | 35                               | 55 - 60.99                              |
| 8    | Veterinarian, nuclear, mechanical or electrical engineer, professional accountant, educational administrator (e.g., college admissions officer, school principal), professional athlete, registered nurse, military officer, elementary, secondary or special education teacher.                                                                                                                                                                                                                                                                                                                                                                                                                                                                                                                                                                                        | 40                               | 61 - 66.99                              |
| 9    | Pharmacist, psychologist, chief executive, judge, aerospace or chemical engineer, professor, lawyer, physician, public official.                                                                                                                                                                                                                                                                                                                                                                                                                                                                                                                                                                                                                                                                                                                                        | 45                               | 67 - 100<br>High                        |

Table S5. Descriptive Statistics for Study Measures

| Measures                                         | N    | Min. | Max.   | Mean   | SD    |
|--------------------------------------------------|------|------|--------|--------|-------|
| <b>CPC program</b>                               |      |      |        |        |       |
| Preschool                                        | 1539 | 0    | 1      | 0.64   | 0.48  |
| School-age                                       | 1539 | 0    | 1      | 0.55   | 0.50  |
| Extended-1 (4-6 years versus fewer)              | 1539 | 0    | 1      | 0.36   | 0.48  |
| Extended-2 (4-6 years versus 1-3 years)          | 989  | 0    | 1      | 0.56   | 0.50  |
| <b>Covariates<sup>1</sup></b>                    |      |      |        |        |       |
| African American child                           | 1539 | 0    | 1      | 0.93   | 0.26  |
| Female child                                     | 1531 | 0    | 1      | 0.50   | 0.50  |
| Reside in high poverty neighborhood              | 1538 | 0    | 1      | 0.50   | 0.50  |
| Child welfare cases histories by age 4           | 1539 | 0    | 1      | 0.04   | 0.19  |
| Mother under age 18 at child birth               | 1539 | 0    | 1      | 0.16   | 0.37  |
| Mother did not complete high school              | 1539 | 0    | 1      | 0.54   | 0.50  |
| Mother not employed                              | 1539 | 0    | 1      | 0.66   | 0.47  |
| Single parent family status                      | 1539 | 0    | 1      | 0.76   | 0.42  |
| Child eligible for subsidized meals              | 1539 | 0    | 1      | 0.83   | 0.37  |
| Participate in TANF                              | 1539 | 0    | 1      | 0.63   | 0.48  |
| Four or more children in family                  | 1539 | 0    | 1      | 0.17   | 0.37  |
| Home environment problems, ages 0-5 <sup>2</sup> | 1531 | 0    | 3      | 0.15   | 0.46  |
| <b>Educational Attainment by Age 28</b>          |      |      |        |        |       |
| On time graduation                               | 1421 | 0    | 1      | 0.41   | 0.49  |
| High school completion                           | 1382 | 0    | 1      | 0.78   | 0.42  |
| Highest grade completed                          | 1380 | 3    | 19     | 12.06  | 1.74  |
| College attendance                               | 1382 | 0    | 1      | 0.34   | 0.48  |
| 4-year college attendance                        | 1382 | 0    | 1      | 0.13   | 0.34  |
| BA or AA degree                                  | 1382 | 0    | 1      | 0.08   | 0.27  |
| <b>Socioeconomic Status</b>                      |      |      |        |        |       |
| Occupational prestige composite (1-8) by age 24  | 1335 | 1    | 8      | 2.71   | 1.53  |
| Occupational prestige $\geq$ 4 by age 24         | 1335 | 0    | 1      | 0.28   | 0.45  |
| SES composite (0-8) ages 24-27                   | 1265 | 0    | 8      | 2.89   | 2.42  |
| SES $\geq$ 4 ages 24-27                          | 1265 | 0    | 1      | 0.34   | 0.47  |
| AA or BA or employed 8+ quarters ages 24-27      | 1388 | 0    | 1      | 0.46   | 0.50  |
| Average annual income ages 24-27                 | 1231 | 0    | 30,000 | 11,331 | 9,292 |
| Average annual income 14K or higher              | 1231 | 0    | 1      | 0.33   | 0.47  |
| Full-time employment (8 or more quarters)        | 1052 | 0    | 1      | 0.25   | 0.43  |

Table S5. Descriptive Statistics for Study Measures (Continued)

| Measures                                              | N    | Min.  | Max.  | Mean  | SD   |
|-------------------------------------------------------|------|-------|-------|-------|------|
| <b>Public Aid</b>                                     |      |       |       |       |      |
| Ages 18-23                                            |      |       |       |       |      |
| Any food stamp participation                          | 1335 | 0     | 1     | 0.57  | 0.50 |
| 2 or more years participation in food stamp           | 1335 | 0     | 1     | 0.27  | 0.44 |
| Any TANF participation, %                             | 1335 | 0     | 1     | 0.25  | 0.43 |
| 2 or more years participation in TANF                 | 1335 | 0     | 1     | 0.09  | 0.28 |
| Ages 24-27                                            |      |       |       |       |      |
| Any food stamp participation                          | 1335 | 0     | 1     | 0.48  | 0.50 |
| 2 or more years participation in food stamp           | 1335 | 0     | 1     | 0.22  | 0.42 |
| Any TANF participation                                | 1335 | 0     | 1     | 0.10  | 0.30 |
| 2 or more years participation in TANF                 | 1335 | 0     | 1     | 0.02  | 0.13 |
| <b>Health Status and Behavior</b>                     |      |       |       |       |      |
| Any insurance by age 27                               | 1304 | 0     | 1     | 0.71  | 0.46 |
| Any public insurance by age 27                        | 1304 | 0     | 1     | 0.29  | 0.45 |
| Any private insurance by age 27                       | 1304 | 0     | 1     | 0.46  | 0.50 |
| Substance abuse (excluding alcohol) ages 16-26        | 1473 | 0     | 1     | 0.21  | 0.41 |
| Drug and alcohol abuse ages 16-26                     | 1342 | 0     | 1     | 0.24  | 0.43 |
| <b>Crime and Justice System Involvement by Age 26</b> |      |       |       |       |      |
| Any adult arrest (include self-report)                | 1473 | 0     | 1     | 0.50  | 0.50 |
| Any violent charge                                    | 1473 | 0     | 1     | 0.21  | 0.41 |
| Any conviction                                        | 1473 | 0     | 1     | 0.27  | 0.44 |
| Number of adult arrests                               | 1473 | 0     | 31    | 1.77  | 3.47 |
| Any felony charge                                     | 1473 | 0     | 1     | 0.22  | 0.41 |
| Number of felony charges                              | 1473 | 0     | 7     | 0.50  | 1.17 |
| Ever incarcerated or jail (include self-report)       | 1465 | 0     | 1     | 0.23  | 0.42 |
| <b>Family Status</b>                                  |      |       |       |       |      |
| Age at birth of first child                           | 757  | 11.86 | 27.15 | 19.14 | 2.65 |
| Parenthood by age 27                                  | 1233 | 0     | 1     | 0.64  | 0.48 |
| Number of children by age 27                          | 1233 | 0     | 6     | 1.29  | 1.31 |
| Had 3 or more children by age 27                      | 1233 | 0     | 1     | 0.19  | 0.39 |
| If married or living with partner by age 24           | 1127 | 0     | 1     | 0.25  | 0.43 |

Note. 1 Missing data were imputed. The variable “home environment problems” had the most imputed data (25.41% imputed). The variable “mother not employed” had 12.80% of imputed data. Less than 7.00% of data for the other covariates were imputed.

2 Home environment problems considered were retrospective reports of frequent family conflict, substance abuse of parent, and family financial problems between ages 0-5.

Table S6a. Estimates of Sample Recovery for Three Outcomes

| Predictors                                         | <u>Crime</u> |       | <u>SES</u> |       | <u>Edu att.</u> |       |
|----------------------------------------------------|--------------|-------|------------|-------|-----------------|-------|
|                                                    | Coef.        | P>z   | Coef.      | P>z   | Coef.           | P>z   |
| Constant term                                      | 1.996        | 0.414 | -0.076     | 0.952 | 1.172           | 0.420 |
| CPC preschool program participation                | -0.085       | 0.575 | 0.041      | 0.609 | 0.081           | 0.276 |
| CPC School-age program participation               | 0.028        | 0.841 | -0.095     | 0.313 | -0.032          | 0.749 |
| Standardized word test, child age 5                | 0.001        | 0.927 | -0.001     | 0.850 | 0.004           | 0.407 |
| Mother did not complete HS, child age 0-3          | -0.190       | 0.192 | -0.037     | 0.685 | -0.172          | 0.084 |
| Child eligible for subsidized meals, child age 0-3 | 0.236        | 0.338 | 0.136      | 0.121 | 0.169           | 0.164 |
| Mother under age 18 at child birth                 | 0.345        | 0.098 | 0.226      | 0.078 | 0.271           | 0.028 |
| Four or more children in family, child age 0-3     | 0.420        | 0.075 | 0.082      | 0.414 | 0.138           | 0.287 |
| Participate in AFDC program, child age 0-3         | -0.224       | 0.112 | -0.108     | 0.416 | -0.229          | 0.067 |
| Mother not employed, child age 0-3                 | -0.029       | 0.835 | 0.065      | 0.651 | 0.025           | 0.846 |
| Single parent family status, child age 0-3         | 0.052        | 0.740 | -0.041     | 0.596 | -0.042          | 0.751 |
| Indicator for missing risk factors, child age 0-3  | -0.631       | 0.000 | -0.441     | 0.001 | -0.387          | 0.001 |
| Reside in high poverty school area                 | -0.007       | 0.968 | 0.005      | 0.931 | -0.075          | 0.545 |
| Low birth weight (<2500g)                          | 0.233        | 0.263 | 0.097      | 0.361 | 0.104           | 0.358 |
| Family conflict, child age 0-5                     | 0.300        | 0.178 | -0.152     | 0.346 | 0.356           | 0.006 |
| Family financial problems, child age 0-5           | -0.023       | 0.927 | 0.085      | 0.598 | 0.184           | 0.271 |
| Substance abuse parent, child age 0-5              | 0.273        | 0.577 | -0.116     | 0.597 | -0.086          | 0.736 |
| Female child                                       | -0.132       | 0.297 | 0.302      | 0.002 | 0.321           | 0.002 |
| African American child                             | -0.020       | 0.947 | 0.013      | 0.926 | 0.092           | 0.566 |
| Proxy of residential mobility                      | 0.043        | 0.585 | -0.101     | 0.060 | -0.067          | 0.337 |
| Have social security number                        | 1.408        | 0.000 | 1.059      | 0.000 | 0.938           | 0.000 |
| Census tract neighborhood mobility < 1 year        | -0.513       | 0.861 | 0.385      | 0.780 | -1.370          | 0.459 |
| Census tract neighborhood mobility 1-5 years       | -2.142       | 0.429 | -0.445     | 0.759 | -0.427          | 0.797 |
| Census tract neighborhood mobility 5-10 years      | -0.882       | 0.754 | 0.758      | 0.569 | -0.308          | 0.865 |
| Census tract neighborhood mobility 10-20 years     | -0.902       | 0.736 | 0.801      | 0.591 | -0.794          | 0.631 |
| Census tract self-employed rate                    | -7.466       | 0.003 | -5.581     | 0.026 | -5.290          | 0.049 |
| Census tract African American female householder   | 0.229        | 0.643 | -0.436     | 0.131 | -0.580          | 0.015 |

Table S6b. Estimates of Participation in the CPC Program (n=1,531)

| Predictors                                         | Preschool |       | School-age |       | Extended |       | No CPC <sup>1</sup> |       | CPC extension <sup>1</sup> |       |
|----------------------------------------------------|-----------|-------|------------|-------|----------|-------|---------------------|-------|----------------------------|-------|
|                                                    | Coef.     | P>z   | Coef.      | P>z   | Coef.    | P>z   | Coef.               | P>z   | Coef.                      | P>z   |
| Constant term                                      | 2.124     | 0.087 | -0.001     | 0.999 | -0.038   | 0.962 | -0.484              | 0.794 | -0.838                     | 0.577 |
| Mother did not complete HS, child age 0-3          | -0.288    | 0.003 | -0.168     | 0.040 | -0.256   | 0.003 | -0.019              | 0.017 | 0.015                      | 0.062 |
| Child eligible for subsidized meals, child age 0-3 | 0.048     | 0.631 | -0.026     | 0.812 | -0.032   | 0.806 | 0.191               | 0.063 | -0.142                     | 0.165 |
| Mother under age 18 at child birth                 | -0.056    | 0.367 | 0.031      | 0.795 | -0.055   | 0.621 | -0.179              | 0.201 | -0.123                     | 0.544 |
| Four or more children in family, child age 0-3     | -0.168    | 0.069 | -0.056     | 0.570 | -0.045   | 0.588 | 0.109               | 0.442 | 0.042                      | 0.842 |
| Participate in AFDC program, child age 0-3         | -0.051    | 0.550 | 0.100      | 0.156 | 0.110    | 0.199 | 0.171               | 0.359 | 0.080                      | 0.656 |
| Mother not employed, child age 0-3                 | 0.148     | 0.111 | 0.032      | 0.743 | -0.003   | 0.978 | 0.117               | 0.300 | 0.250                      | 0.036 |
| Single parent family status, child age 0-3         | -0.001    | 0.988 | -0.027     | 0.747 | 0.010    | 0.897 | -0.294              | 0.052 | -0.160                     | 0.302 |
| Indicator for missing risk factors, child age 0-3  | -0.148    | 0.068 | -0.351     | 0.000 | -0.470   | 0.000 | 0.081               | 0.450 | 0.057                      | 0.594 |
| Reside in high poverty neighborhood                | 1.679     | 0.000 | 0.356      | 0.415 | 0.467    | 0.255 | -0.133              | 0.334 | -0.743                     | 0.000 |
| Low birth weight (<2500g)                          | -0.254    | 0.002 | -0.091     | 0.486 | -0.244   | 0.029 | -2.431              | 0.000 | -0.890                     | 0.135 |
| Child underage at preschool entry                  | -0.148    | 0.160 | -0.112     | 0.267 | -0.109   | 0.335 | 0.217               | 0.213 | -0.111                     | 0.574 |
| Family conflict, child age 0-5                     | 0.020     | 0.878 | 0.138      | 0.213 | 0.120    | 0.357 | -0.011              | 0.956 | -0.146                     | 0.526 |
| Family financial problems, child age 0-5           | -0.002    | 0.987 | -0.044     | 0.709 | -0.285   | 0.003 | 0.394               | 0.108 | 0.366                      | 0.116 |
| Substance abuse parent, child age 0-5              | 0.108     | 0.417 | -0.109     | 0.487 | 0.196    | 0.121 | -0.040              | 0.869 | -0.419                     | 0.024 |
| Female child                                       | 0.104     | 0.058 | -0.002     | 0.982 | 0.083    | 0.283 | -0.359              | 0.129 | 0.034                      | 0.877 |
| African American child                             | -0.247    | 0.686 | 0.018      | 0.966 | -0.125   | 0.714 | -0.011              | 0.919 | 0.036                      | 0.763 |
| Age in months at kindergarten                      | -0.033    | 0.028 | 0.002      | 0.896 | -0.004   | 0.773 | 0.207               | 0.722 | -0.125                     | 0.392 |

Note: 1. Coefficients are from a multinomial probit regression. Base outcome is no CPC extension group.

AFDC = Aid to Families with Dependent Children.

Table S6c. Propensity Scores: Means and Standard Errors of the Mean

| Propensity Scores                                        | Mean   | S.E.   |
|----------------------------------------------------------|--------|--------|
| Prob. CPC preschool participation                        | 0.6454 | 0.0030 |
| Prob. CPC school age participation                       | 0.5552 | 0.0017 |
| Prob. CPC extended program participation                 | 0.3612 | 0.0022 |
| Prob. of being in the education sample                   | 0.9027 | 0.0023 |
| Prob. of being in the crime sample                       | 0.9620 | 0.0020 |
| Prob. of being in the SES sample                         | 0.8265 | 0.0033 |
| Prob. of being in the health insurance sample            | 0.8515 | 0.0035 |
| Prob. of being in the TANF sample                        | 0.9021 | 0.0040 |
| (prob. CPC prek) * (prob. educ. Sample)                  | 0.5843 | 0.0033 |
| (prob. CPC prek) * (prob. crime. sample)                 | 0.6220 | 0.0030 |
| (prob. CPC prek) * (prob. SES sample)                    | 0.5354 | 0.0034 |
| (prob. CPC prek) * (prob. health insurance sample)       | 0.5523 | 0.0036 |
| (prob. CPC prek) * (prob. TANF sample)                   | 0.5844 | 0.0039 |
| (prob. CPC school-age) * (prob. educ. Sample)            | 0.5041 | 0.0023 |
| (prob. CPC school-age) * (prob. crime. sample)           | 0.5366 | 0.0023 |
| (prob. CPC school-age) * (prob. SES sample)              | 0.4630 | 0.0026 |
| (prob. CPC school-age) * (prob. health insurance sample) | 0.4765 | 0.0027 |
| (prob. CPC school-age) * (prob. TANF sample)             | 0.4901 | 0.0031 |
| (prob. CPC extended) * (prob. educ. Sample)              | 0.3297 | 0.0024 |
| (prob. CPC extended) * (prob. crime. sample)             | 0.3503 | 0.0024 |
| (prob. CPC extended) * (prob. SES sample)                | 0.3035 | 0.0024 |
| (prob. CPC extended) * (prob. health insurance sample)   | 0.3126 | 0.0025 |
| (prob. CPC extended) * (prob. TANF sample)               | 0.3226 | 0.0027 |

Note: Propensity scores for program participation controls for 8 indicators of preprogram risk status, sex of child, race/ethnicity, low birth weight, age in months at kindergarten and home environment at ages 0-5. Propensity scores for sample retention controls for 8 indicators of preprogram risk status, sex of child, race/ethnicity, home environment at ages 0-5, school mobility, neighborhood residential mobility, having data on participant's social security number, percentage of unemployed in participant's neighborhood census tract, and percentage of females head of the household in participant's neighborhood census tract.

Table S6d. Probability of Program Participation and Recovery by Program and Comparison Group Status

| Propensity Scores                                                         | Preschool |       | School-Age |       | Extended (PreK+ School Age) |       |
|---------------------------------------------------------------------------|-----------|-------|------------|-------|-----------------------------|-------|
|                                                                           | Yes       | No    | Yes        | No    | Yes                         | No    |
| Probability of CPC participation <sup>1</sup>                             | 0.667     | 0.606 | 0.564      | 0.545 | 0.382                       | 0.349 |
| Prob. of being in the education sample                                    | 0.910     | 0.889 | 0.912      | 0.891 | 0.926                       | 0.890 |
| Prob. of being in the crime sample                                        | 0.962     | 0.962 | 0.971      | 0.951 | 0.976                       | 0.954 |
| Prob. of being in the SES sample                                          | 0.832     | 0.817 | 0.835      | 0.816 | 0.852                       | 0.812 |
| Prob. of being in the health insurance sample                             | 0.860     | 0.836 | 0.856      | 0.846 | 0.873                       | 0.839 |
| Prob. of being in the TANF sample                                         | 0.895     | 0.916 | 0.898      | 0.907 | 0.899                       | 0.904 |
| (prob. CPC participation <sup>1</sup> ) * (prob. educ. Sample)            | 0.608     | 0.541 | 0.516      | 0.489 | 0.355                       | 0.315 |
| (prob. CPC participation <sup>1</sup> ) * (prob. crime. sample)           | 0.643     | 0.584 | 0.549      | 0.522 | 0.374                       | 0.337 |
| (prob. CPC participation <sup>1</sup> ) * (prob. SES sample)              | 0.556     | 0.497 | 0.474      | 0.450 | 0.327                       | 0.290 |
| (prob. CPC participation <sup>1</sup> ) * (prob. health insurance sample) | 0.576     | 0.509 | 0.485      | 0.466 | 0.336                       | 0.300 |
| (prob. CPC participation <sup>1</sup> ) * (prob. TANF sample)             | 0.599     | 0.557 | 0.509      | 0.498 | 0.344                       | 0.320 |

Notes: <sup>1</sup> Probability of CPC participation refers to the probability of CPC preschool participation for the first column, probability of CPC school-age participation for the second column, and probability of CPC extended group (preschool + school-age) for the last column.

- Propensity scores for program participation controls for 8 indicators of preprogram risk status, sex of child, race/ethnicity, low birth weight, age in months at kindergarten and home environment at ages 0-5. Propensity scores for sample retention controls for 8 indicators of preprogram risk status, sex of child, race/ethnicity, home environment at ages 0-5, school mobility, neighborhood residential mobility, having data on participant’s social security number, percentage of unemployed in participant’s neighborhood census tract, and percentage of females head of the household in participant’s neighborhood census tract.

Table S6e. Robustness Analysis for Predicting CPC Preschool Participation by Model Specification

| Model variable                                           | Model 1 |       | Model 2 |       | Model 3 |       | Model 4 |       | Model 5 |       | Model 6 |       | Model 7 |       |
|----------------------------------------------------------|---------|-------|---------|-------|---------|-------|---------|-------|---------|-------|---------|-------|---------|-------|
|                                                          | dF/dx   | P>z   |
| Mother did not complete high school, child age 0-3       | -0.105  | 0.003 | -0.098  | 0.009 | -0.108  | 0.002 |         |       |         |       |         |       | -0.093  | 0.007 |
| At least one parent completed high school at child birth |         |       |         |       |         |       | 0.096   | 0.012 |         |       |         |       |         |       |
| Highest year of education of a parent at child birth     |         |       |         |       |         |       |         |       | 0.031   | 0.001 |         |       |         |       |
| At least one parent completed college at child birth     |         |       |         |       |         |       |         |       |         |       | 0.072   | 0.053 | 0.059   | 0.079 |
| Child eligible for subsidized meals, child age 0-3       | 0.018   | 0.620 | 0.026   | 0.481 | 0.024   | 0.515 | 0.024   | 0.520 | 0.023   | 0.538 | 0.016   | 0.672 | 0.020   | 0.590 |
| Mother under age 18 at child birth                       | -0.021  | 0.382 | -0.015  | 0.493 | -0.014  | 0.580 | -0.009  | 0.760 | -0.011  | 0.660 | -0.049  | 0.011 | -0.016  | 0.486 |
| Four or more children in family, child age 0-3           | -0.063  | 0.068 | -0.045  | 0.204 | -0.064  | 0.078 | -0.069  | 0.076 | -0.062  | 0.120 | -0.071  | 0.055 | -0.059  | 0.099 |
| Participate in AFDC program, child age 0-3               | -0.019  | 0.553 | -0.010  | 0.763 | -0.018  | 0.580 | -0.031  | 0.298 | -0.028  | 0.338 | -0.020  | 0.541 | -0.014  | 0.658 |
| Mother not employed, child age 0-3                       | 0.054   | 0.112 | 0.061   | 0.092 | 0.052   | 0.118 | 0.052   | 0.086 | 0.053   | 0.092 | 0.043   | 0.185 | 0.055   | 0.108 |
| Single parent family status, child age 0-3               | 0.001   | 0.980 | 0.009   | 0.767 | 0.004   | 0.898 | 0.004   | 0.907 | 0.009   | 0.780 | 0.005   | 0.869 | 0.005   | 0.862 |
| Indicator for missing risk factors, child age 0-3        | -0.057  | 0.063 | -0.065  | 0.030 | -0.073  | 0.020 | -0.066  | 0.060 | -0.070  | 0.044 | -0.087  | 0.006 | -0.076  | 0.014 |
| Low birth weight (<2500g)                                | -0.069  | 0.030 | -0.058  | 0.073 | -0.072  | 0.032 | -0.072  | 0.035 | -0.071  | 0.036 | -0.071  | 0.034 | -0.065  | 0.040 |
| Child underage at preschool entry                        | -0.054  | 0.170 | -0.045  | 0.243 | -0.052  | 0.165 | -0.050  | 0.194 | -0.053  | 0.152 | -0.043  | 0.250 | -0.051  | 0.190 |
| Family conflict, child age 0-5                           | 0.006   | 0.895 | -0.018  | 0.694 | 0.009   | 0.846 | 0.031   | 0.492 | 0.029   | 0.532 | 0.000   | 0.997 | 0.005   | 0.912 |
| Family financial problems, child age 0-5                 | 0.000   | 0.992 | 0.017   | 0.687 | 0.007   | 0.866 | 0.002   | 0.962 | 0.013   | 0.786 | 0.022   | 0.611 | 0.005   | 0.910 |
| Substance abuse parent, child age 0-5                    | 0.036   | 0.454 | 0.032   | 0.496 | 0.040   | 0.409 | 0.041   | 0.364 | 0.042   | 0.341 | 0.046   | 0.342 | 0.041   | 0.395 |
| Female child                                             | 0.039   | 0.057 | 0.036   | 0.086 | 0.037   | 0.079 | 0.032   | 0.136 | 0.034   | 0.106 | 0.040   | 0.064 | 0.039   | 0.059 |
| African American child                                   | -0.087  | 0.685 | -0.063  | 0.780 | -0.062  | 0.771 | -0.056  | 0.782 | -0.093  | 0.633 | -0.041  | 0.847 | -0.090  | 0.674 |
| Age in months at kindergarten                            | -0.012  | 0.031 | -0.012  | 0.035 | -0.013  | 0.027 | -0.013  | 0.028 | -0.013  | 0.023 | -0.012  | 0.036 | -0.012  | 0.037 |
| Reside in high poverty neighborhood                      | 0.618   | 0.000 |         |       | 1.027   | 0.031 | 1.045   | 0.032 | 1.074   | 0.027 | 0.975   | 0.037 | 0.637   | 0.000 |
| Census tract female householder in poverty               |         |       | 0.608   | 0.027 |         |       |         |       |         |       |         |       |         |       |
| Census tract self-employed rate                          |         |       |         |       | -0.801  | 0.107 | -0.829  | 0.095 | -0.796  | 0.114 | -0.759  | 0.13  |         |       |
| Census tract households receiving public aid             |         |       |         |       | -0.262  | 0.529 | -0.275  | 0.528 | -0.307  | 0.479 | -0.204  | 0.62  |         |       |
| Chi-squared                                              | 325.22  |       | 182.85  |       | 370.65  |       | 498.43  |       | 579.22  |       | 367.01  |       | 366.71  |       |
| Predicted propensity score                               | 0.645   | 0.117 | 0.645   | 0.09  | 0.645   | 0.125 | 0.649   | 0.125 | 0.649   | 0.129 | 0.645   | 0.119 | 0.645   | 0.119 |

Note. Coefficients are from probit regression analysis and are marginal effects in percentage points.

Table S6f. Robustness Analysis for Predicting CPC School-Age Participation by Model Specification

| Model variable                                           | Model 1 |       | Model 2 |       | Model 3 |        | Model 4 |       | Model 5 |       | Model 6 |       | Model 7 |       |
|----------------------------------------------------------|---------|-------|---------|-------|---------|--------|---------|-------|---------|-------|---------|-------|---------|-------|
|                                                          | dF/dx   | P>z   | dF/dx   | P>z   | dF/dx   | P>z    | dF/dx   | P>z   | dF/dx   | P>z   | dF/dx   | P>z   | dF/dx   | P>z   |
| Mother did not complete high school, child age 0-3       | -0.065  | 0.043 | -0.063  | 0.052 | -0.064  | 0.540  |         |       |         |       |         |       | -0.055  | 0.063 |
| At least one parent completed high school at child birth |         |       |         |       |         |        | 0.062   | 0.075 |         |       |         |       |         |       |
| Highest year of education of a parent at child birth     |         |       |         |       |         |        |         |       | 0.017   | 0.118 |         |       |         |       |
| At least one of parent completed college at child birth  |         |       |         |       |         |        |         |       |         |       | 0.066   | 0.148 | 0.051   | 0.248 |
| Child eligible for subsidized meals, child age 0-3       | -0.010  | 0.823 | -0.002  | 0.957 | -0.011  | 0.837  | -0.005  | 0.902 | -0.006  | 0.884 | -0.015  | 0.725 | -0.008  | 0.844 |
| Mother under age 18 at child birth                       | 0.012   | 0.792 | 0.021   | 0.638 | 0.010   | 0.163  | 0.025   | 0.619 | 0.020   | 0.685 | -0.007  | 0.878 | 0.017   | 0.724 |
| Four or more children in family, child age 0-3           | -0.023  | 0.562 | -0.011  | 0.788 | -0.027  | 0.167  | -0.026  | 0.550 | -0.023  | 0.576 | -0.028  | 0.476 | -0.019  | 0.634 |
| Participate in AFDC program, child age 0-3               | 0.040   | 0.155 | 0.043   | 0.126 | 0.040   | 0.626  | 0.041   | 0.150 | 0.040   | 0.156 | 0.040   | 0.169 | 0.044   | 0.133 |
| Mother not employed, child age 0-3                       | 0.012   | 0.762 | 0.016   | 0.675 | 0.008   | 0.662  | 0.007   | 0.864 | 0.007   | 0.860 | 0.004   | 0.909 | 0.013   | 0.740 |
| Single parent family status, child age 0-3               | -0.009  | 0.781 | -0.004  | 0.911 | -0.011  | 0.764  | -0.030  | 0.431 | -0.027  | 0.469 | -0.008  | 0.810 | -0.006  | 0.868 |
| Indicator for missing risk factors, child age 0-3        | -0.141  | 0.000 | -0.147  | 0.000 | -0.136  | 0.158  | -0.186  | 0.000 | -0.185  | 0.000 | -0.150  | 0.000 | -0.155  | 0.000 |
| Low birth weight (<2500g)                                | 0.001   | 0.979 | 0.004   | 0.904 | -0.006  | 0.118  | 0.003   | 0.928 | 0.003   | 0.926 | -0.004  | 0.922 | 0.004   | 0.909 |
| Child underage at preschool entry                        | -0.042  | 0.288 | -0.040  | 0.316 | -0.043  | 0.221  | -0.028  | 0.490 | -0.030  | 0.459 | -0.037  | 0.326 | -0.040  | 0.307 |
| Family conflict, child age 0-5                           | 0.053   | 0.210 | 0.047   | 0.267 | 0.062   | 0.057  | 0.087   | 0.064 | 0.086   | 0.068 | 0.058   | 0.202 | 0.053   | 0.212 |
| Family financial problems, child age 0-5                 | -0.016  | 0.734 | -0.017  | 0.712 | -0.015  | 0.070  | -0.011  | 0.828 | -0.004  | 0.933 | -0.006  | 0.898 | -0.013  | 0.788 |
| Substance abuse parent, child age 0-5                    | -0.048  | 0.445 | -0.052  | 0.393 | -0.054  | 0.041  | -0.062  | 0.338 | -0.062  | 0.335 | -0.048  | 0.451 | -0.043  | 0.491 |
| Female child                                             | 0.000   | 0.986 | -0.001  | 0.960 | 0.001   | 0.503  | 0.001   | 0.977 | 0.002   | 0.942 | 0.003   | 0.910 | 0.000   | 0.997 |
| African American child                                   | 0.007   | 0.967 | 0.019   | 0.911 | -0.011  | 0.929  | -0.026  | 0.868 | -0.043  | 0.774 | -0.001  | 0.996 | 0.005   | 0.977 |
| Age in months at kindergarten                            | 0.001   | 0.862 | 0.000   | 0.943 | 0.001   | 63.540 | 0.002   | 0.768 | 0.001   | 0.787 | 0.001   | 0.870 | 0.001   | 0.810 |
| Reside in high poverty neighborhood                      | 0.138   | 0.429 |         |       | -0.096  | 0.417  | -0.189  | 0.720 | -0.179  | 0.737 | -0.127  | 0.798 | 0.154   | 0.373 |
| Census tract female householder in poverty               |         |       | -0.243  | 0.494 |         |        |         |       |         |       |         |       |         |       |
| Census tract self-employed rate                          |         |       |         |       | -0.642  | 0.257  | -0.574  | 0.172 | -0.559  | 0.188 | -0.604  | 0.156 |         |       |
| Census tract households receiving public aid             |         |       |         |       | 0.380   | 0.396  | 0.501   | 0.302 | 0.488   | 0.319 | 0.422   | 0.346 |         |       |
| Chi-squared                                              | 107.93  |       | 96.75   |       | 370.39  |        | 178.22  |       | 162.87  |       | 269.01  |       | 104.47  |       |
| Predicted propensity score                               | 0.555   |       | 0.555   |       | 0.555   |        | 0.556   |       | 0.556   |       | 0.555   |       | 0.555   |       |

Note. Coefficients are from probit regression analysis and are marginal effects in percentage points.

Table S6g. Robustness Analysis for Predicting CPC Extended Intervention Participation by Model Specification (Extended-1 Contrast)

| Model variable                                           | Model 1 |       | Model 2 |       | Model 3 |       | Model 4 |       | Model 5 |       | Model 6 |       | Model 7 |       |
|----------------------------------------------------------|---------|-------|---------|-------|---------|-------|---------|-------|---------|-------|---------|-------|---------|-------|
|                                                          | dF/dx   | P>z   |
| Mother did not complete high school, child age 0-3       | -0.095  | 0.004 | -0.093  | 0.005 | -0.097  | 0.003 |         |       |         |       |         |       | -0.083  | 0.008 |
| At least one parent completed high school at child birth |         |       |         |       |         |       | 0.090   | 0.009 |         |       |         |       |         |       |
| Highest year of education of a parent at child birth     |         |       |         |       |         |       |         |       | 0.027   | 0.012 |         |       |         |       |
| At least one parent completed college at child birth     |         |       |         |       |         |       |         |       |         |       | 0.078   | 0.079 | 0.059   | 0.159 |
| Child eligible for subsidized meals, child age 0-3       | -0.012  | 0.811 | -0.006  | 0.893 | -0.008  | 0.866 | -0.004  | 0.937 | -0.003  | 0.949 | -0.014  | 0.776 | -0.010  | 0.842 |
| Mother under age 18 at child birth                       | -0.020  | 0.637 | -0.016  | 0.712 | -0.016  | 0.708 | -0.004  | 0.928 | -0.010  | 0.816 | -0.045  | 0.279 | -0.015  | 0.724 |
| Four or more children in family, child age 0-3           | -0.017  | 0.579 | -0.009  | 0.773 | -0.019  | 0.533 | -0.019  | 0.556 | -0.014  | 0.659 | -0.024  | 0.408 | -0.012  | 0.686 |
| Participate in AFDC program, child age 0-3               | 0.041   | 0.200 | 0.044   | 0.171 | 0.042   | 0.187 | 0.034   | 0.272 | 0.034   | 0.257 | 0.039   | 0.215 | 0.046   | 0.126 |
| Mother not employed, child age 0-3                       | -0.002  | 0.962 | 0.001   | 0.967 | -0.004  | 0.910 | -0.001  | 0.985 | -0.001  | 0.986 | -0.010  | 0.778 | -0.001  | 0.982 |
| Single parent family status, child age 0-3               | 0.005   | 0.857 | 0.010   | 0.741 | 0.008   | 0.792 | -0.004  | 0.912 | 0.002   | 0.956 | 0.010   | 0.729 | 0.010   | 0.717 |
| Indicator for missing risk factors, child age 0-3        | -0.163  | 0.000 | -0.167  | 0.000 | -0.170  | 0.000 | -0.202  | 0.000 | -0.202  | 0.000 | -0.181  | 0.000 | -0.177  | 0.000 |
| Low birth weight (<2500g)                                | -0.042  | 0.192 | -0.039  | 0.220 | -0.045  | 0.157 | -0.040  | 0.207 | -0.040  | 0.207 | -0.044  | 0.146 | -0.039  | 0.215 |
| Child underage at preschool entry                        | -0.038  | 0.367 | -0.035  | 0.396 | -0.036  | 0.379 | -0.021  | 0.625 | -0.023  | 0.582 | -0.028  | 0.474 | -0.035  | 0.396 |
| Family conflict, child age 0-5                           | 0.044   | 0.372 | 0.037   | 0.439 | 0.048   | 0.363 | 0.063   | 0.242 | 0.062   | 0.254 | 0.042   | 0.440 | 0.044   | 0.365 |
| Family financial problems, child age 0-5                 | -0.100  | 0.003 | -0.098  | 0.003 | -0.095  | 0.004 | -0.097  | 0.005 | -0.088  | 0.011 | -0.084  | 0.015 | -0.097  | 0.005 |
| Substance abuse parent, child age 0-5                    | 0.070   | 0.146 | 0.066   | 0.162 | 0.070   | 0.146 | 0.068   | 0.176 | 0.069   | 0.161 | 0.079   | 0.109 | 0.076   | 0.121 |
| Female child                                             | 0.031   | 0.281 | 0.030   | 0.299 | 0.030   | 0.301 | 0.026   | 0.372 | 0.028   | 0.335 | 0.034   | 0.255 | 0.031   | 0.276 |
| African American child                                   | -0.048  | 0.711 | -0.037  | 0.776 | -0.035  | 0.781 | -0.043  | 0.724 | -0.073  | 0.533 | -0.015  | 0.906 | -0.050  | 0.698 |
| Age in months at kindergarten                            | -0.001  | 0.832 | -0.001  | 0.795 | -0.001  | 0.788 | 0.000   | 0.948 | 0.000   | 0.972 | -0.001  | 0.827 | -0.001  | 0.892 |
| Reside in high poverty neighborhood                      | 0.172   | 0.269 |         |       | 0.380   | 0.343 | 0.342   | 0.417 | 0.358   | 0.398 | 0.340   | 0.396 | 0.190   | 0.219 |
| Census tract female householder in poverty               |         |       | -0.015  | 0.954 |         |       |         |       |         |       |         |       |         |       |
| Census tract self-employed rate                          |         |       |         |       | -0.597  | 0.153 | -0.561  | 0.182 | -0.539  | 0.214 | -0.549  | 0.199 |         |       |
| Census tract households receiving public aid             |         |       |         |       | -0.097  | 0.788 | -0.041  | 0.914 | -0.057  | 0.882 | -0.046  | 0.899 |         |       |
| Chi-squared                                              | 156.76  |       | 187.20  |       | 382.86  |       | 155.84  |       | 122.98  |       | 92.39   |       | 153.88  |       |
| Predicted propensity score                               | 0.361   |       | 0.361   |       | 0.361   |       | 0.364   |       | 0.364   |       | 0.360   |       | 0.361   |       |

Note. Coefficients are from probit regression analysis and are marginal effects in percentage points. Extended intervention-1 = CPC participation for 4 to 6 years (preschool to second or third grade) versus fewer years. Results for the extended intervention-2 contrast (4 to 6 years of participation versus those attending only in preschool and kindergarten) were nearly identical and are not shown.

Table S7a. Robustness Results for Selected Outcomes

| Estimation Method                                | Preschool |      |       |         | School-Age |      |      |         | Extended-1 |      |       |         | Extended-2 |              |      |         |
|--------------------------------------------------|-----------|------|-------|---------|------------|------|------|---------|------------|------|-------|---------|------------|--------------|------|---------|
|                                                  | Interv    | Comp | Diff. | P Value | Interv     | Comp | Diff | p Value | Interv     | Comp | Diff. | P Value | Interv     | Comp, PK + K | Diff | P Value |
| <b>SES <math>\geq</math> 4, %</b>                |           |      |       |         |            |      |      |         |            |      |       |         |            |              |      |         |
| Unadjusted                                       | 36.4      | 29.3 | 7.1   | .010    | 35.2       | 32.4 | 2.8  | .306    | 38.3       | 31.4 | 6.9   | .013    | 38.2       | 33.9         | 4.3  | .252    |
| Adjusted (with covariates <sup>1</sup> )         | 34.3      | 29.4 | 4.9   | .066    | 33.1       | 31.9 | 1.2  | .725    | 36.1       | 30.4 | 5.7   | .042    | 35.3       | 32.1         | 3.2  | .391    |
| Adjusted (with covariates <sup>2</sup> )         | 34.2      | 29.2 | 5.0   | .058    | 33.        | 31.7 | 1.4  | .690    | 36.1       | 30.3 | 5.8   | .037    | 35.3       | 31.9         | 3.4  | .369    |
| Adjusted with attrition correction <sup>3</sup>  | 34.2      | 28.8 | 5.4   | .044    | 32.8       | 31.3 | 1.4  | .679    | 35.8       | 30.3 | 5.5   | .041    | 34.9       | 31.6         | 3.3  | .348    |
| Adjusted with attrition correction <sup>4</sup>  | 36.0      | 29.9 | 6.1   | .001    | 35.0       | 32.2 | 2.8  | .350    | 37.9       | 32.2 | 5.7   | .017    | 33.8       | 29.5         | 4.4  | .060    |
| Adjusted with attrition correction <sup>5</sup>  | 34.2      | 29.1 | 5.1   | .091    | 32.9       | 31.5 | 1.4  | .683    | 36.0       | 30.1 | 5.9   | .004    | 35.2       | 31.9         | 3.3  | .372    |
| Adjusted with selection correction <sup>6</sup>  | 34.4      | 28.9 | 5.5   | .055    | 32.9       | 31.6 | 1.3  | .693    | 36.3       | 30.6 | 5.7   | .036    | 35.5       | 31.9         | 3.6  | .351    |
| Adjusted with attrition & selection <sup>7</sup> | 34.4      | 28.6 | 5.8   | .043    | 32.6       | 31.5 | 1.1  | .717    | 36.1       | 30.6 | 5.4   | .038    | 35.2       | 31.4         | 3.8  | .303    |
| <b>Any health insurance, %</b>                   |           |      |       |         |            |      |      |         |            |      |       |         |            |              |      |         |
| Unadjusted                                       | 74.8      | 64.8 | 10.0  | .000    | 71.4       | 71.1 | 0.3  | .895    | 75.5       | 68.8 | 6.7   | .010    | 75.4       | 75.1         | 0.3  | .925    |
| Adjusted (with covariates <sup>1</sup> )         | 76.7      | 66.6 | 10.1  | .000    | 72.0       | 75.1 | -3.1 | .184    | 76.8       | 71.2 | 5.6   | .009    | 77.3       | 77.2         | 0.1  | .982    |
| Adjusted (with covariates <sup>2</sup> )         | 76.8      | 66.8 | 10.0  | .000    | 72.3       | 75.0 | -2.7 | .234    | 77.1       | 71.3 | 5.8   | .006    | 77.5       | 76.9         | 0.6  | .839    |
| Adjusted with attrition correction <sup>3</sup>  | 75.7      | 63.6 | 12.1  | .000    | 70.1       | 73.6 | -3.5 | .140    | 75.3       | 69.4 | 5.9   | .005    | 75.8       | 76.4         | -0.6 | .835    |
| Adjusted with attrition correction <sup>4</sup>  | 75.2      | 68.4 | 6.8   | .001    | 72.5       | 71.2 | 1.3  | .542    | 76.5       | 70.3 | 6.2   | .016    | NA         | NA           | NA   | NA      |
| Adjusted with attrition correction <sup>5</sup>  | 75.4      | 66.1 | 9.3   | .000    | 71.0       | 73.2 | -2.2 | .325    | 76.3       | 70.8 | 5.5   | .008    | 76.9       | 76.0         | 0.9  | .784    |
| Adjusted with selection correction <sup>6</sup>  | 76.0      | 67.0 | 9.0   | .000    | 70.9       | 73.8 | -2.9 | .216    | 75.5       | 70.1 | 5.4   | .009    | 76.2       | 76.0         | 0.2  | .956    |
| Adjusted with attrition & selection <sup>7</sup> | 76.3      | 65.8 | 10.6  | .000    | 70.4       | 73.6 | -3.2 | .180    | 75.4       | 69.5 | 5.9   | .004    | 75.9       | 76.1         | -0.2 | .952    |
| <b>Any felony charge, %</b>                      |           |      |       |         |            |      |      |         |            |      |       |         |            |              |      |         |
| Unadjusted                                       | 19.2      | 25.6 | -6.4  | .005    | 21.6       | 21.5 | 0.1  | .976    | 19.5       | 22.7 | -3.2  | .153    | 19.5       | 18.3         | 1.2  | .673    |
| Adjusted (with covariates <sup>1</sup> )         | 13.4      | 17.8 | -4.4  | .051    | 15.4       | 14.1 | 1.3  | .487    | 14.0       | 15.4 | -1.4  | .573    | 14.3       | 12.8         | 1.5  | .591    |
| Adjusted (with covariates <sup>2</sup> )         | 13.0      | 17.9 | -4.9  | .030    | 15.0       | 14.0 | 1.0  | .584    | 13.5       | 15.3 | -1.8  | .452    | 13.8       | 12.5         | 1.3  | .624    |
| Adjusted with attrition correction <sup>3</sup>  | 13.1      | 17.9 | -4.8  | .036    | 15.3       | 13.9 | 1.4  | .432    | 14.0       | 15.3 | -1.3  | .593    | 14.2       | 12.2         | 2.0  | .499    |
| Adjusted with attrition correction <sup>4</sup>  | 19.3      | 25.1 | -5.8  | .005    | 21.3       | 21.3 | 0.0  | .891    | 19         | 22.5 | -3.5  | 0.057   | NA         | NA           | NA   | NA      |
| Adjusted with attrition correction <sup>5</sup>  | 12.7      | 17.7 | -5.0  | .028    | 14.9       | 14.0 | 0.9  | .651    | 13.4       | 15.4 | -2.0  | 0.412   | 0.1        | -1.2         | 1.3  | .668    |
| Adjusted with selection correction <sup>6</sup>  | 12.7      | 17.0 | -4.4  | .038    | 15.2       | 14.3 | 0.9  | .622    | 13.8       | 15.5 | -1.6  | .501    | 14.1       | 13.1         | 1.0  | .742    |
| Adjusted with attrition & selection <sup>7</sup> | 12.5      | 17.1 | -4.6  | .030    | 15.2       | 14.0 | 1.2  | .532    | 13.9       | 15.3 | -1.4  | .551    | 14.2       | 12.8         | 1.4  | .645    |
| <b>Substance abuse (excluding alcohol), %</b>    |           |      |       |         |            |      |      |         |            |      |       |         |            |              |      |         |
| Unadjusted                                       | 18.9      | 25.4 | -6.5  | .004    | 21.2       | 21.3 | -0.1 | .947    | 19.0       | 22.6 | -3.6  | .101    | 18.9       | 20.4         | -1.5 | .617    |
| Adjusted (with covariates <sup>1</sup> )         | 14.3      | 18.8 | -4.5  | .021    | 16.3       | 15.0 | 1.3  | .641    | 14.8       | 16.4 | -1.6  | .582    | 15.1       | 16.0         | -0.9 | .837    |
| Adjusted (with covariates <sup>2</sup> )         | 13.9      | 18.8 | -4.9  | .013    | 16.0       | 14.9 | 1.1  | .690    | 14.4       | 16.3 | -1.9  | .478    | 14.7       | 15.8         | -1.1 | .790    |
| Adjusted with attrition correction <sup>3</sup>  | 14.1      | 18.9 | -4.8  | .017    | 16.4       | 14.8 | 1.6  | .563    | 14.8       | 16.3 | -1.6  | .581    | 15.1       | 15.6         | -0.5 | .902    |
| Adjusted with attrition correction <sup>4</sup>  | 19.2      | 25.3 | -6.1  | .004    | 21.1       | 21.1 | 0.0  | .879    | 19.0       | 22.5 | -3.5  | .110    | 20.8       | 23.7         | -2.9 | .065    |

Table S7a. Robustness Results for Selected Outcomes (Continued)

| Estimation Method                                | Preschool |       |       |         | School-Age |       |       |         | Extended-1 |       |       |         | Extended-2 |       |       |         |
|--------------------------------------------------|-----------|-------|-------|---------|------------|-------|-------|---------|------------|-------|-------|---------|------------|-------|-------|---------|
|                                                  | Interv    | Comp  | Diff. | P Value | Interv     | Comp  | Diff. | P Value | Interv     | Comp  | Diff. | P Value | Interv     | Comp  | Diff. | P Value |
| Adjusted with attrition correction <sup>5</sup>  | 13.8      | 18.7  | -4.9  | .013    | 16.1       | 15.2  | 0.9   | .753    | 14.4       | 16.6  | -2.2  | .417    | 14.7       | 16.1  | -1.4  | .752    |
| Adjusted with selection correction <sup>6</sup>  | 13.8      | 17.9  | -4.1  | .012    | 16.3       | 15.3  | 0.9   | .741    | 15.0       | 17.0  | -2.0  | .485    | 15.3       | 16.6  | -1.3  | .763    |
| Adjusted with attrition & selection <sup>7</sup> | 13.6      | 17.9  | -4.3  | .010    | 16.4       | 15.0  | 1.4   | .633    | 14.9       | 16.8  | -1.8  | .514    | 15.3       | 16.3  | -1.0  | .818    |
| <b>Substance abuse with alcohol, %</b>           |           |       |       |         |            |       |       |         |            |       |       |         |            |       |       |         |
| Unadjusted                                       | 23.6      | 31.8  | -8.1  | 0.002   | 25.7       | 27.6  | -1.9  | 0.732   | 22.9       | 28.7  | -5.8  | 0.025   | 22.6       | 26.5  | -3.9  | 0.338   |
| Adjusted (with covariates <sup>1</sup> )         | 19.8      | 24.6  | -4.8  | 0.026   | 21.4       | 21.5  | -0.1  | 0.982   | 20.4       | 22.2  | -1.8  | 0.607   | 20.4       | 22.6  | -2.2  | 0.649   |
| Adjusted (with covariates <sup>2</sup> )         | 19.3      | 24.5  | -5.1  | 0.021   | 20.9       | 21.3  | -0.4  | 0.892   | 19.8       | 22.0  | -2.1  | 0.525   | 19.8       | 22.4  | -2.6  | 0.584   |
| Adjusted with attrition correction <sup>3</sup>  | 19.0      | 24.8  | -5.7  | 0.012   | 21.1       | 20.9  | 0.2   | 0.944   | 19.9       | 21.9  | -2.0  | 0.554   | 19.9       | 21.7  | -1.9  | 0.690   |
| Adjusted with attrition correction <sup>4</sup>  | 23.7      | 31.2  | -7.5  | 0.002   | 25.6       | 27.3  | -1.7  | 0.732   | 22.4       | 25.2  | -2.8  | 0.390   | 26.6       | 29.6  | -3.0  | 0.442   |
| Adjusted with attrition correction <sup>5</sup>  | 19.2      | 24.3  | -5.1  | 0.021   | 20.7       | 20.2  | 0.5   | 0.863   | 19.7       | 21.9  | -2.2  | 0.505   | 19.7       | 22.4  | -2.7  | 0.568   |
| Adjusted with selection correction <sup>6</sup>  | 19.1      | 24.7  | -5.6  | 0.018   | 20.9       | 21.8  | -0.9  | 0.766   | 19.8       | 22.4  | -2.6  | 0.431   | 19.8       | 23.2  | -3.4  | 0.476   |
| Adjusted with attrition & selection <sup>7</sup> | 18.3      | 24.1  | -5.8  | 0.005   | 21.1       | 21.4  | -0.3  | 0.928   | 19.8       | 22.3  | -2.4  | 0.466   | 19.8       | 22.5  | -2.7  | 0.564   |
| <b>Ever incarcerated or jail, %</b>              |           |       |       |         |            |       |       |         |            |       |       |         |            |       |       |         |
| Unadjusted                                       | 20.87     | 28.02 | -7.15 | 0.002   | 23.63      | 23.14 | 0.49  | 0.825   | 19.85      | 25.49 | -5.64 | 0.014   | 22.38      | 23.82 | -1.44 | 0.648   |
| Adjusted (with covariates <sup>1</sup> )         | 19.74     | 25.07 | -5.33 | 0.051   | 21.57      | 19.28 | 2.29  | 0.333   | 18.71      | 21.67 | -2.96 | 0.227   | 21.69      | 22.13 | -0.44 | 0.898   |
| Adjusted (with covariates <sup>2</sup> )         | 19.15     | 24.87 | -5.72 | 0.032   | 20.93      | 18.99 | 1.94  | 0.409   | 17.97      | 21.38 | -3.41 | 0.143   | 20.93      | 21.83 | -0.90 | 0.780   |
| Adjusted with attrition correction <sup>3</sup>  | 19.19     | 25.07 | -5.88 | 0.037   | 21.08      | 19.02 | 2.06  | 0.400   | 18.10      | 21.42 | -3.32 | 0.158   | 21.06      | 21.93 | -0.87 | 0.795   |
| Adjusted with attrition correction <sup>4</sup>  | 20.62     | 27.26 | -6.64 | 0.001   | 23.21      | 22.51 | 0.70  | 0.921   | 19.09      | 22.43 | -3.34 | 0.159   | 20.90      | 27.30 | -6.40 | 0.051   |
| Adjusted with attrition correction <sup>5</sup>  | 19.19     | 24.92 | -5.73 | 0.031   | 21.03      | 19.01 | 2.02  | 0.383   | 18.03      | 21.38 | -3.35 | 0.149   | 21.00      | 21.80 | -0.80 | 0.803   |
| Adjusted with selection correction <sup>6</sup>  | 18.90     | 25.55 | -6.65 | 0.021   | 20.82      | 18.40 | 2.42  | 0.349   | 18.09      | 21.80 | -3.71 | 0.119   | 21.06      | 22.04 | -0.98 | 0.761   |
| Adjusted with attrition & selection <sup>7</sup> | 18.54     | 23.69 | -5.15 | 0.026   | 20.99      | 19.04 | 1.95  | 0.358   | 18.19      | 21.80 | -3.61 | 0.135   | 21.16      | 22.11 | -0.95 | 0.776   |
| <b>Years of education</b>                        |           |       |       |         |            |       |       |         |            |       |       |         |            |       |       |         |
| Unadjusted                                       | 12.2      | 11.8  | 0.3   | 0.001   | 12.1       | 12.0  | 0.2   | 0.089   | 12.3       | 11.9  | 0.3   | 0.001   | 12.2       | 12.0  | 0.2   | 0.070   |
| Adjusted (with covariates <sup>1</sup> )         | 12.1      | 11.9  | 0.2   | 0.057   | 12.1       | 12.0  | 0.1   | 0.415   | 12.1       | 12.0  | 0.1   | 0.103   | 12.1       | 12.0  | 0.1   | 0.328   |
| Adjusted (with covariates <sup>2</sup> )         | 12.1      | 11.9  | 0.2   | 0.054   | 12.1       | 12.0  | 0.1   | 0.416   | 12.1       | 12.0  | 0.1   | 0.100   | 12.1       | 12.0  | 0.1   | 0.351   |
| Adjusted with attrition correction <sup>3</sup>  | 12.1      | 11.9  | 0.3   | 0.028   | 12.1       | 12.0  | 0.0   | 0.664   | 12.1       | 12.0  | 0.1   | 0.128   | 12.1       | 12.1  | 0.1   | 0.548   |
| Adjusted with attrition correction <sup>4</sup>  | 12.2      | 12.0  | 0.2   | 0.049   | 12.2       | 12.0  | 0.2   | 0.080   | 12.3       | 12.0  | 0.3   | 0.006   | 12.0       | 12.0  | 0.0   | 0.857   |
| Adjusted with attrition correction <sup>5</sup>  | 12.1      | 11.9  | 0.2   | 0.063   | 12.1       | 12.0  | 0.1   | 0.457   | 12.1       | 12.0  | 0.1   | 0.111   | 12.1       | 12.0  | 0.1   | 0.372   |
| Adjusted with selection correction <sup>6</sup>  | 12.1      | 11.9  | 0.2   | 0.099   | 12.1       | 12.0  | 0.1   | 0.304   | 12.2       | 12.0  | 0.2   | 0.067   | 12.2       | 12.0  | 0.2   | 0.191   |
| Adjusted with attrition & selection <sup>7</sup> | 12.2      | 11.9  | 0.3   | 0.044   | 12.1       | 12.0  | 0.1   | 0.521   | 12.2       | 12.0  | 0.2   | 0.095   | 12.2       | 12.0  | 0.1   | 0.329   |

Note. 1. Adjusted for school-age participation (preschool participation), 8 indicators of preprogram risk status, sex of child, race/ethnicity, child welfare history by age 4, and a dummy-coded variable for missing data on risk status. Robust standard errors were used. 2. Adjusted for school-age participation, 8 indicators of preprogram risk status, sex of child, race/ethnicity, child welfare history by age 4, and a dummy-coded variable for missing data on risk status. School poverty was replaced with neighborhood poverty at 1980. Home environment at ages 0-5 was included. Robust standard errors were used. 3. Inverse probability weighting (IPW) of being in the study sample was created. This variable was used as a sampling weight in the model. 4. Propensity score matching using a kernel bi-weight was employed to correct for attrition. 5 The probability of retention (propensity score) was used as a regressor. 6. Inverse probability weighting of being in the CPC program group was created. This variable was used as a sampling weight in the model. 7. Inverse probability weighting was obtained by multiplying the IPW of being in the study sample and the IPW of being in the program group. This variable was used as a sampling weight in the model. NA: Models were not estimated.

Table S7b. Additional Robustness Results for Selected Adult Outcomes

| Estimation Method                             | Preschool |        |        |         | School-Age |        |        |         | Extended-1 |        |        |         |
|-----------------------------------------------|-----------|--------|--------|---------|------------|--------|--------|---------|------------|--------|--------|---------|
|                                               | Interv    | Comp   | Diff.  | p-value | Interv     | Comp   | Diff.  | p-value | Interv     | Comp   | Diff.  | p-value |
| <b>Highest grade completed</b>                |           |        |        |         |            |        |        |         |            |        |        |         |
| Unadjusted                                    | 12.180    | 11.848 | 0.332  | 0.001   | 12.135     | 11.974 | 0.161  | 0.089   | 12.272     | 11.940 | 0.332  | 0.001   |
| Adjusted (with covariates)                    | 12.129    | 11.901 | 0.228  | 0.051   | 12.081     | 12.006 | 0.076  | 0.425   | 12.216     | 11.950 | 0.265  | 0.015   |
| Adjusted with attrition correction            |           |        |        |         |            |        |        |         |            |        |        |         |
| Inverse probability weighting                 | 12.142    | 11.879 | 0.263  | 0.027   | 12.066     | 12.026 | 0.040  | 0.672   | 12.211     | 11.955 | 0.256  | 0.019   |
| Reg. propensity score                         | 12.121    | 11.902 | 0.219  | 0.060   | 12.074     | 12.005 | 0.069  | 0.469   | 12.203     | 11.951 | 0.252  | 0.020   |
| Adjusted with selection correction            |           |        |        |         |            |        |        |         |            |        |        |         |
| Inverse probability weighting                 | 12.156    | 11.929 | 0.227  | 0.060   | 12.086     | 11.988 | 0.097  | 0.303   | 12.230     | 11.950 | 0.280  | 0.014   |
| Reg. propensity score                         | 12.139    | 11.881 | 0.258  | 0.039   | 12.085     | 12.004 | 0.082  | 0.378   | 12.222     | 11.947 | 0.275  | 0.012   |
| Adjusted with attrition & selection           |           |        |        |         |            |        |        |         |            |        |        |         |
| Inverse probability weighting                 | 12.166    | 11.916 | 0.250  | 0.038   | 12.067     | 12.007 | 0.060  | 0.520   | 12.223     | 11.954 | 0.268  | 0.019   |
| Reg. propensity score                         | 12.139    | 11.887 | 0.252  | 0.045   | 12.087     | 12.005 | 0.082  | 0.389   | 12.221     | 11.949 | 0.272  | 0.013   |
| <b>Substance abuse (excluding alcohol), %</b> |           |        |        |         |            |        |        |         |            |        |        |         |
| Unadjusted                                    | 18.947    | 25.430 | -6.483 | 0.004   | 21.186     | 21.329 | -0.143 | 0.947   | 18.969     | 0.226  | -3.612 | 0.102   |
| Adjusted (with covariates)                    | 18.322    | 22.808 | -4.486 | 0.021   | 16.363     | 15.167 | 1.196  | 0.663   | 14.838     | 0.165  | -1.671 | 0.556   |
| Adjusted with attrition correction            |           |        |        |         |            |        |        |         |            |        |        |         |
| Inverse probability weighting                 | 18.700    | 23.934 | -5.234 | 0.012   | 16.100     | 14.731 | 1.369  | 0.563   | 14.300     | 0.162  | -1.900 | 0.581   |
| Reg. propensity score                         | 18.173    | 22.936 | -4.762 | 0.021   | 16.133     | 15.074 | 1.059  | 0.706   | 14.568     | 0.164  | -1.842 | 0.514   |
| Adjusted with selection correction            |           |        |        |         |            |        |        |         |            |        |        |         |
| Inverse probability weighting                 | 18.835    | 23.938 | -5.103 | 0.012   | 16.280     | 15.332 | 0.948  | 0.741   | 14.980     | 0.170  | -1.981 | 0.485   |
| Reg. propensity score                         | 14.243    | 19.161 | -4.918 | 0.014   | 16.321     | 15.161 | 1.160  | 0.673   | 14.624     | 0.165  | -1.921 | 0.506   |
| Adjusted with attrition & selection           |           |        |        |         |            |        |        |         |            |        |        |         |
| Inverse probability weighting                 | 18.611    | 23.342 | -4.731 | 0.010   | 16.360     | 15.003 | 1.357  | 0.633   | 14.939     | 0.168  | -1.848 | 0.514   |
| Reg. propensity score                         | 18.164    | 23.616 | -5.452 | 0.009   | 16.145     | 15.113 | 1.032  | 0.711   | 14.487     | 0.165  | -2.029 | 0.482   |
| <b>Occupational prestige composite (1-8)</b>  |           |        |        |         |            |        |        |         |            |        |        |         |
| Unadjusted                                    | 2.815     | 2.506  | 0.309  | 0.000   | 2.737      | 2.665  | 0.072  | 0.390   | 2.898      | 2.591  | 0.306  | 0.000   |
| Adjusted (with covariates)                    | 2.794     | 2.552  | 0.242  | 0.020   | 2.710      | 2.706  | 0.003  | 0.981   | 2.871      | 2.612  | 0.259  | 0.022   |
| Adjusted with attrition correction            |           |        |        |         |            |        |        |         |            |        |        |         |
| Inverse probability weighting                 | 2.800     | 2.548  | 0.252  | 0.022   | 2.702      | 2.722  | -0.020 | 0.878   | 2.863      | 2.622  | 0.241  | 0.031   |
| Reg. propensity score                         | 2.794     | 2.553  | 0.242  | 0.021   | 2.710      | 2.706  | 0.004  | 0.976   | 2.873      | 2.613  | 0.260  | 0.020   |
| Adjusted with selection correction            |           |        |        |         |            |        |        |         |            |        |        |         |
| Inverse probability weighting                 | 2.814     | 2.564  | 0.250  | 0.014   | 2.704      | 2.693  | 0.011  | 0.935   | 2.850      | 2.610  | 0.241  | 0.033   |
| Reg. propensity score                         | 2.803     | 2.537  | 0.266  | 0.019   | 2.710      | 2.706  | 0.003  | 0.981   | 2.869      | 2.613  | 0.256  | 0.024   |
| Adjusted with attrition & selection           |           |        |        |         |            |        |        |         |            |        |        |         |
| Inverse probability weighting                 | 2.819     | 2.562  | 0.257  | 0.015   | 2.693      | 2.708  | -0.015 | 0.907   | 2.840      | 2.623  | 0.217  | 0.052   |
| Reg. propensity score                         | 2.806     | 2.539  | 0.266  | 0.017   | 2.709      | 2.706  | 0.003  | 0.981   | 2.867      | 2.613  | 0.255  | 0.023   |

Table. S7b. Additional Robustness Results for Selected Adult Outcomes (Continued)

| Estimation Method                   | Preschool |        |        |         | School-Age |        |        |         | Extended-1 |        |        |         |
|-------------------------------------|-----------|--------|--------|---------|------------|--------|--------|---------|------------|--------|--------|---------|
|                                     | Interv    | Comp   | Diff.  | p-value | Interv     | Comp   | Diff.  | p-value | Interv     | Comp   | Diff.  | p-value |
| <b>Any felony charge, %</b>         |           |        |        |         |            |        |        |         |            |        |        |         |
| Unadjusted                          | 19.263    | 25.621 | -6.358 | 0.005   | 21.550     | 21.484 | 0.066  | 0.976   | 19.521     | 22.688 | -3.167 | 0.154   |
| Adjusted (with covariates)          | 18.827    | 23.863 | -5.036 | 0.027   | 19.910     | 18.965 | 0.945  | 0.612   | 18.445     | 20.298 | -1.853 | 0.434   |
| Adjusted with attrition correction  |           |        |        |         |            |        |        |         |            |        |        |         |
| Inverse probability weighting       | 18.640    | 23.951 | -5.311 | 0.021   | 19.932     | 18.717 | 1.215  | 0.512   | 18.463     | 20.130 | -1.667 | 0.478   |
| Reg. propensity score               | 18.739    | 23.757 | -5.018 | 0.028   | 19.770     | 18.914 | 0.856  | 0.651   | 18.276     | 20.237 | -1.961 | 0.412   |
| Adjusted with selection correction  |           |        |        |         |            |        |        |         |            |        |        |         |
| Inverse probability weighting       | 18.750    | 24.373 | -5.623 | 0.030   | 19.810     | 18.573 | 1.237  | 0.573   | 18.388     | 20.423 | -2.035 | 0.395   |
| Reg. propensity score               | 18.531    | 24.305 | -5.774 | 0.010   | 19.847     | 18.586 | 1.261  | 0.495   | 18.272     | 20.331 | -2.059 | 0.384   |
| Adjusted with attrition & selection |           |        |        |         |            |        |        |         |            |        |        |         |
| Inverse probability weighting       | 18.138    | 23.269 | -5.131 | 0.017   | 19.850     | 18.454 | 1.396  | 0.440   | 18.449     | 20.258 | -1.809 | 0.447   |
| Reg. propensity score               | 18.429    | 24.148 | -5.719 | 0.010   | 19.680     | 18.551 | 1.129  | 0.542   | 18.174     | 20.299 | -2.125 | 0.370   |
| <b>Any health insurance, %</b>      |           |        |        |         |            |        |        |         |            |        |        |         |
| Unadjusted                          | 74.706    | 64.758 | 9.948  | 0.000   | 71.389     | 71.057 | 0.332  | 0.895   | 75.410     | 68.750 | 6.660  | 0.010   |
| Adjusted (with covariates)          | 75.727    | 65.734 | 9.993  | 0.000   | 71.072     | 73.749 | -2.677 | 0.238   | 75.971     | 70.191 | 5.780  | 0.005   |
| Adjusted with attrition correction  |           |        |        |         |            |        |        |         |            |        |        |         |
| Inverse probability weighting       | 75.942    | 63.909 | 12.033 | 0.000   | 73.553     | 76.686 | -3.133 | 0.165   | 75.680     | 69.577 | 6.103  | 0.003   |
| Reg. propensity score               | 75.057    | 65.778 | 9.279  | 0.000   | 70.838     | 72.998 | -2.160 | 0.325   | 75.352     | 69.815 | 5.537  | 0.008   |
| Adjusted with selection correction  |           |        |        |         |            |        |        |         |            |        |        |         |
| Inverse probability weighting       | 76.040    | 66.745 | 9.295  | 0.000   | 71.290     | 73.798 | -2.508 | 0.327   | 75.918     | 70.133 | 5.785  | 0.004   |
| Reg. propensity score               | 75.814    | 65.549 | 10.265 | 0.000   | 71.054     | 73.879 | -2.825 | 0.203   | 75.879     | 70.248 | 5.631  | 0.007   |
| Adjusted with attrition & selection |           |        |        |         |            |        |        |         |            |        |        |         |
| Inverse probability weighting       | 72.244    | 61.614 | 10.630 | 0.000   | 70.823     | 75.635 | -4.812 | 0.041   | 75.750     | 69.558 | 6.192  | 0.001   |
| Reg. propensity score               | 75.454    | 66.042 | 9.412  | 0.000   | 71.667     | 74.004 | -2.337 | 0.278   | 75.509     | 70.264 | 5.245  | 0.014   |

*Note.* Adjusted means or percentages are shown along with the group difference marginal effects. Extended-1 = Extended intervention participation for 4 to 6 years (preschool to second or third grade) versus fewer years.

Table S8. Unadjusted Means for Adult Outcomes by Age 28

| Outcomes                                       | Preschool <sup>1</sup> |        |       |         | School-Age <sup>2</sup> |        |       |         | Extended-1 <sup>3</sup> |        |       |         | Extended-2 <sup>4</sup> |              |       |         |
|------------------------------------------------|------------------------|--------|-------|---------|-------------------------|--------|-------|---------|-------------------------|--------|-------|---------|-------------------------|--------------|-------|---------|
|                                                | Interv                 | Comp   | Diff. | P Value | Interv                  | Comp   | Diff. | p Value | Interv                  | Comp   | Diff. | P Value | Interv                  | Comp, PK + K | Diff. | P Value |
| <b>Educational Attainment</b>                  |                        |        |       |         |                         |        |       |         |                         |        |       |         |                         |              |       |         |
| On time graduation, %                          | 44.31                  | 34.74  | 9.57  | 0.000   | 44.41                   | 36.54  | 7.87  | 0.003   | 48.58                   | 36.47  | 12.11 | 0.000   | 48.58                   | 38.85        | 9.73  | 0.008   |
| High school completion, %                      | 80.29                  | 72.73  | 7.56  | 0.001   | 79.32                   | 75.49  | 3.83  | 0.090   | 81.75                   | 75.20  | 6.55  | 0.005   | 81.75                   | 76.75        | 5.00  | 0.098   |
| Highest grade completed                        | 12.18                  | 11.85  | 0.33  | 0.001   | 12.13                   | 11.97  | 0.16  | 0.089   | 12.27                   | 11.94  | 0.33  | 0.001   | 12.27                   | 12.03        | 0.24  | 0.068   |
| College attendance, %                          | 35.19                  | 33.06  | 2.13  | 0.426   | 35.79                   | 32.73  | 3.06  | 0.235   | 38.25                   | 32.18  | 6.07  | 0.022   | 38.25                   | 30.63        | 7.62  | 0.033   |
| 4-year college attendance, %                   | 14.70                  | 10.54  | 4.16  | 0.028   | 14.22                   | 12.01  | 2.21  | 0.229   | 15.72                   | 11.76  | 3.96  | 0.037   | 15.72                   | 13.65        | 2.07  | 0.437   |
| BA or AA degree, %                             | 8.46                   | 7.64   | 0.82  | 0.595   | 8.78                    | 7.40   | 1.38  | 0.351   | 9.51                    | 7.38   | 2.13  | 0.164   | 9.51                    | 6.64         | 2.87  | 0.167   |
| <b>Socioeconomic Status</b>                    |                        |        |       |         |                         |        |       |         |                         |        |       |         |                         |              |       |         |
| Occupational prestige composite (1-8)          | 2.82                   | 2.51   | 0.31  | 0.000   | 2.73                    | 2.66   | 0.07  | 0.390   | 2.90                    | 2.59   | 0.31  | 0.000   | 2.90                    | 2.78         | 0.12  | 0.330   |
| Occupational prestige ≥ 4, %                   | 30.19                  | 22.78  | 7.41  | 0.004   | 27.73                   | 27.35  | 0.38  | 0.877   | 31.33                   | 25.33  | 6.00  | 0.018   | 31.33                   | 30.47        | 0.86  | 0.810   |
| SES composite (0-8)                            | 3.02                   | 2.64   | 0.38  | 0.007   | 3.00                    | 2.74   | 0.26  | 0.062   | 3.21                    | 2.70   | 0.51  | 0.000   | 3.21                    | 2.74         | 0.47  | 0.014   |
| SES ≥ 4, %                                     | 36.42                  | 29.28  | 7.14  | 0.010   | 35.12                   | 32.37  | 2.75  | 0.306   | 38.22                   | 31.36  | 6.86  | 0.013   | 38.22                   | 33.88        | 4.34  | 0.252   |
| AA or BA or employed 8+ quarters, %            | 47.35                  | 42.36  | 4.99  | 0.075   | 45.76                   | 45.41  | 0.35  | 0.897   | 48.46                   | 43.89  | 4.57  | 0.098   | 48.46                   | 45.05        | 3.41  | 0.361   |
| Average annual income, (\$)                    | 11,658                 | 10,726 | 932   | 0.001   | 11,355                  | 11,301 | 54    | 0.846   | 12,022                  | 10,920 | 1,102 | 0.074   | 12,022                  | 11,474       | 548   | 0.569   |
| Average annual income 14K or higher, %         | 34.08                  | 30.48  | 3.60  | 0.198   | 32.61                   | 33.09  | -0.48 | 0.858   | 34.94                   | 31.57  | 3.37  | 0.224   | 34.94                   | 34.02        | 0.90  | 0.813   |
| Full-time employment (8 or more quarters), %   | 24.61                  | 24.65  | -0.04 | 0.989   | 24.42                   | 24.89  | -0.47 | 0.861   | 26.11                   | 23.69  | 2.42  | 0.375   | 26.11                   | 23.76        | 2.35  | 0.530   |
| <b>Public Aid</b>                              |                        |        |       |         |                         |        |       |         |                         |        |       |         |                         |              |       |         |
| Ages 18-23                                     |                        |        |       |         |                         |        |       |         |                         |        |       |         |                         |              |       |         |
| Any food stamp participation, %                | 55.64                  | 58.24  | -2.60 | 0.361   | 55.50                   | 57.93  | -2.43 | 0.374   | 55.17                   | 57.43  | -2.26 | 0.419   | 55.17                   | 58.40        | -3.23 | 0.398   |
| 2 or more years participation in food stamp, % | 26.39                  | 28.27  | -1.88 | 0.461   | 25.16                   | 29.48  | -4.32 | 0.079   | 24.96                   | 28.35  | -3.39 | 0.174   | 24.96                   | 29.20        | -4.24 | 0.213   |
| Any TANF participation, %                      | 25.92                  | 24.41  | 1.51  | 0.545   | 24.77                   | 26.21  | -1.44 | 0.550   | 25.35                   | 25.43  | -0.08 | 0.972   | 25.35                   | 29.60        | -4.25 | 0.214   |
| 2 or more years participation in TANF, %       | 9.45                   | 7.28   | 2.17  | 0.178   | 8.35                    | 9.14   | -0.79 | 0.610   | 9.36                    | 8.28   | 1.08  | 0.495   | 9.36                    | 10.80        | -1.44 | 0.531   |
| Ages 24-27                                     |                        |        |       |         |                         |        |       |         |                         |        |       |         |                         |              |       |         |
| Any food stamp participation, %                | 48.73                  | 46.25  | 2.48  | 0.387   | 46.62                   | 49.48  | -2.86 | 0.300   | 46.78                   | 48.54  | -1.76 | 0.532   | 46.78                   | 52.80        | -6.02 | 0.119   |
| 2 or more years participation in food stamp, % | 21.66                  | 23.13  | -1.47 | 0.539   | 21.98                   | 22.41  | -0.43 | 0.852   | 21.83                   | 22.38  | -0.55 | 0.813   | 21.83                   | 22.00        | -0.17 | 0.958   |
| Any TANF participation, %                      | 10.02                  | 9.42   | 0.60  | 0.724   | 9.4                     | 10.34  | -0.94 | 0.567   | 9.75                    | 9.85   | -0.10 | 0.949   | 9.75                    | 11.60        | -1.85 | 0.433   |
| 2 or more years participation in TANF, %       | 1.61                   | 2.14   | -0.53 | 0.491   | 1.99                    | 1.55   | 0.44  | 0.553   | 1.56                    | 1.95   | -0.39 | 0.604   | 1.56                    | 1.60         | -0.04 | 0.966   |

Table S8. Unadjusted Means for Adult Outcomes by Age 28 (Continued)

| Outcomes                                           | Preschool <sup>1</sup> |       |       |         | School-Age <sup>2</sup> |       |       |         | Extended-1 <sup>3</sup> |       |       |         | Extended-2 <sup>4</sup> |       |       |         |
|----------------------------------------------------|------------------------|-------|-------|---------|-------------------------|-------|-------|---------|-------------------------|-------|-------|---------|-------------------------|-------|-------|---------|
|                                                    | Interv                 | Comp  | Diff. | P Value | Interv                  | Comp  | Diff. | P Value | Interv                  | Comp  | Diff. | P Value | Interv                  | Comp  | Diff. | P Value |
| <b>Health Status and Behavior</b>                  |                        |       |       |         |                         |       |       |         |                         |       |       |         |                         |       |       |         |
| Any insurance, %                                   | 74.71                  | 64.76 | 9.95  | 0.000   | 71.39                   | 71.06 | 0.33  | 0.895   | 75.41                   | 68.75 | 6.66  | 0.010   | 75.41                   | 75.10 | 0.31  | 0.925   |
| Any public insurance, %                            | 30.12                  | 26.43 | 3.69  | 0.161   | 27.79                   | 30.16 | -2.37 | 0.348   | 27.05                   | 29.90 | -2.85 | 0.370   | 27.05                   | 32.69 | -5.64 | 0.108   |
| Any private insurance, %                           | 49.06                  | 41.19 | 7.87  | 0.007   | 47.63                   | 44.54 | 3.19  | 0.251   | 52.46                   | 42.65 | 9.81  | 0.001   | 52.46                   | 46.30 | 6.16  | 0.110   |
| Substance abuse (excluding alcohol), %             | 18.95                  | 25.43 | -6.48 | 0.004   | 21.19                   | 21.33 | -0.14 | 0.947   | 18.97                   | 22.58 | -3.61 | 0.101   | 18.97                   | 20.42 | -1.45 | 0.617   |
| Drug and alcohol abuse, %                          | 21.19                  | 29.53 | -8.34 | 0.001   | 23.20                   | 25.22 | -2.02 | 0.392   | 20.47                   | 26.30 | -5.83 | 0.015   | 20.47                   | 24.22 | -3.75 | 0.237   |
| <b>Crime and Justice System Involvement</b>        |                        |       |       |         |                         |       |       |         |                         |       |       |         |                         |       |       |         |
| Any adult arrest (include self-report), %          | 48.10                  | 54.30 | -6.20 | 0.023   | 52.4                    | 47.5  | 4.9   | 0.096   | 49.35                   | 50.85 | -1.50 | 0.577   | 49.35                   | 45.42 | 3.93  | 0.282   |
| Any violent charge, %                              | 19.89                  | 22.75 | -2.86 | 0.198   | 18.2                    | 17.6  | 0.6   | 0.769   | 18.78                   | 22.15 | -3.37 | 0.124   | 18.79                   | 20.07 | -1.29 | 0.656   |
| Any conviction, %                                  | 25.05                  | 30.21 | -5.16 | 0.033   | 27.0                    | 25.9  | 1.1   | 0.654   | 24.12                   | 28.49 | -4.37 | 0.067   | 24.12                   | 25.35 | -1.23 | 0.697   |
| Number of adult arrests                            | 1.68                   | 1.92  | -0.24 | 0.203   | 1.7                     | 1.8   | -0.1  | 0.462   | 1.60                    | 1.86  | -0.26 | 0.170   | 1.60                    | 1.81  | -0.21 | 0.406   |
| Any felony charge, %                               | 19.26                  | 25.62 | -6.36 | 0.005   | 21.6                    | 20.4  | 1.2   | 0.512   | 19.52                   | 22.69 | -3.17 | 0.153   | 19.52                   | 18.31 | 1.21  | 0.673   |
| Number of felony charges                           | 0.46                   | 0.58  | -0.12 | 0.056   | 0.5                     | 0.5   | 0.0   | 0.557   | 0.46                    | 0.53  | -0.07 | 0.246   | 0.46                    | 0.46  | -0.00 | 0.972   |
| Ever incarcerated or jail (include self-report), % | 20.87                  | 28.02 | -7.15 | 0.002   | 18.1                    | 16.0  | 2.1   | 0.400   | 19.85                   | 25.48 | -5.63 | 0.014   | 19.85                   | 21.20 | -1.35 | 0.648   |
| <b>Family Status</b>                               |                        |       |       |         |                         |       |       |         |                         |       |       |         |                         |       |       |         |
| Age at birth of first child                        | 19.22                  | 18.99 | 0.23  | 0.259   | 19.20                   | 19.06 | 0.14  | 0.465   | 19.34                   | 19.01 | 0.33  | 0.101   | 19.34                   | 19.09 | 0.25  | 0.361   |
| Parenthood, %                                      | 64.48                  | 63.53 | 0.95  | 0.741   | 65.80                   | 62.09 | 3.71  | 0.178   | 65.58                   | 63.29 | 2.29  | 0.417   | 65.58                   | 62.90 | 2.68  | 0.477   |
| Number of children                                 | 1.14                   | 1.30  | -0.16 | 0.835   | 1.33                    | 1.26  | 0.07  | 0.385   | 1.31                    | 1.29  | 0.02  | 0.832   | 1.31                    | 1.26  | 0.05  | 0.662   |
| Had 3 or more children, %                          | 18.69                  | 18.35 | 0.34  | 0.886   | 19.07                   | 17.95 | 1.12  | 0.615   | 19.05                   | 18.29 | 0.76  | 0.740   | 19.05                   | 18.15 | 0.90  | 0.769   |
| If married or living with partner, %               | 25.17                  | 25.52 | -0.35 | 0.897   | 25.86                   | 24.54 | 1.32  | 0.613   | 25.23                   | 25.33 | -0.10 | 0.971   | 25.23                   | 26.70 | -1.47 | 0.685   |

Note. Extended intervention-1 = CPC participation for 4 to 6 years (preschool to second or third grade) versus fewer years. Extended intervention-2 = CPC participation for 4 to 6 years versus participation in preschool and kindergarten only.

Table S9. Adjusted Means with IPW Attrition Correction and Robust Standard Errors for Adult Outcomes by Age 28

| Outcomes                                       | Preschool <sup>1</sup> |        |       |         | School-Age <sup>2</sup> |        |       |         | Extended-1 <sup>3</sup> |        |       |         | Extended-2 <sup>4</sup> |              |       |         |
|------------------------------------------------|------------------------|--------|-------|---------|-------------------------|--------|-------|---------|-------------------------|--------|-------|---------|-------------------------|--------------|-------|---------|
|                                                | Interv                 | Comp   | Diff. | P Value | Interv                  | Comp   | Diff. | p Value | Interv                  | Comp   | Diff. | P Value | Interv                  | Comp, PK + K | Diff. | P Value |
| <b>Educational Attainment</b>                  |                        |        |       |         |                         |        |       |         |                         |        |       |         |                         |              |       |         |
| On time graduation, %                          | 44.3                   | 36.6   | 7.7   | 0.018   | 44.4                    | 35.3   | 9.1   | 0.011   | 48.6                    | 31.3   | 17.3  | 0.001   | 48.6                    | 33.3         | 15.3  | 0.026   |
| High school completion, %                      | 81.5                   | 75.1   | 6.4   | 0.007   | 80.0                    | 78.5   | 1.5   | 0.493   | 82.7                    | 77.2   | 5.5   | 0.010   | 81.5                    | 79.6         | 1.9   | 0.519   |
| Highest grade completed                        | 12.1                   | 11.9   | 0.3   | 0.028   | 12.1                    | 12.0   | 0.0   | 0.664   | 12.2                    | 12.0   | 0.3   | 0.020   | 12.1                    | 12.1         | 0.1   | 0.548   |
| College attendance, %                          | 32.8                   | 33.4   | -0.7  | 0.841   | 34.3                    | 31.4   | 3.0   | 0.287   | 35.7                    | 31.5   | 4.2   | 0.183   | 34.4                    | 29.6         | 4.8   | 0.233   |
| 4-year college attendance, %                   | 14.7                   | 10.5   | 3.5   | 0.040   | 14.2                    | 13.6   | 0.6   | 0.767   | 14.7                    | 11.8   | 2.9   | 0.240   | 15.7                    | 16.4         | -0.7  | 0.803   |
| BA or AA degree, %                             | 8.4                    | 8.5    | -0.1  | 0.916   | 8.8                     | 7.4    | 1.4   | 0.386   | 9.5                     | 8.3    | 1.2   | 0.292   | 9.5                     | 8.1          | 1.4   | 0.477   |
| <b>Socioeconomic Status</b>                    |                        |        |       |         |                         |        |       |         |                         |        |       |         |                         |              |       |         |
| Occupational prestige composite (1-8)          | 2.8                    | 2.5    | 0.3   | 0.025   | 2.7                     | 2.7    | 0.0   | 0.856   | 2.9                     | 2.6    | 0.2   | 0.034   | 2.8                     | 2.8          | 0.0   | 0.876   |
| Occupational prestige $\geq$ 4, %              | 28.2                   | 21.4   | 6.8   | 0.012   | 24.7                    | 26.9   | -2.1  | 0.509   | 28.4                    | 24.3   | 4.1   | 0.200   | 26.8                    | 28.4         | -1.6  | 0.735   |
| SES composite (0-8)                            | 3.0                    | 2.7    | 0.2   | 0.103   | 3.0                     | 2.8    | 0.2   | 0.336   | 3.1                     | 2.7    | 0.4   | 0.017   | 3.1                     | 2.7          | 0.3   | 0.132   |
| SES $\geq$ 4, %                                | 34.4                   | 28.6   | 5.7   | 0.031   | 32.8                    | 31.6   | 1.2   | 0.702   | 35.9                    | 30.3   | 5.6   | 0.036   | 34.9                    | 31.6         | 3.3   | 0.338   |
| AA or BA or employed 8+ quarters, %            | 45.7                   | 40.6   | 5.0   | 0.238   | 43.6                    | 44.2   | -0.6  | 0.892   | 46.2                    | 42.5   | 3.6   | 0.193   | 45.5                    | 43.7         | 1.8   | 0.649   |
| Average annual income, (\$)                    | 11,582                 | 10,796 | 786   | 0.017   | 11,250                  | 11,278 | -28   | 0.296   | 11,822                  | 10,942 | 880   | 0.150   | 11,737                  | 11,232       | 505   | 0.373   |
| Average annual income 14K or higher, %         | 32.5                   | 29.4   | 3.1   | 0.363   | 31.2                    | 31.7   | -0.5  | 0.898   | 32.9                    | 30.6   | 2.3   | 0.430   | 32.1                    | 31.5         | 0.6   | 0.860   |
| Full-time employment (8 or more quarters), %   | 24.0                   | 25.9   | -2.0  | 0.630   | 25.4                    | 23.8   | 1.6   | 0.710   | 25.4                    | 24.3   | 1.1   | 0.683   | 25.1                    | 21.0         | 4.1   | 0.302   |
| <b>Public Aid</b>                              |                        |        |       |         |                         |        |       |         |                         |        |       |         |                         |              |       |         |
| Ages 18-23                                     |                        |        |       |         |                         |        |       |         |                         |        |       |         |                         |              |       |         |
| Any food stamp participation, %                | 54.8                   | 59.6   | -4.9  | 0.043   | 55.2                    | 58.1   | -2.8  | 0.290   | 53.9                    | 58.0   | -4.1  | 0.198   | 55.0                    | 57.7         | -2.7  | 0.451   |
| 2 or more years participation in food stamp, % | 26.4                   | 27.5   | -1.1  | 0.647   | 25.2                    | 29.4   | -4.2  | 0.089   | 25.0                    | 28.8   | -3.8  | 0.190   | 25.0                    | 22.2         | -2.8  | 0.358   |
| Any TANF participation, %                      | 25.9                   | 24.4   | 1.5   | 0.496   | 24.8                    | 25.1   | -0.3  | 0.921   | 25.3                    | 25.3   | 0.0   | 0.989   | 25.3                    | 21.5         | -3.8  | 0.194   |
| 2 or more years participation in TANF, %       | 9.5                    | 7.0    | 2.5   | 0.103   | 8.3                     | 9.8    | -1.5  | 0.440   | 9.4                     | 8.2    | 1.2   | 0.438   | 9.4                     | 8.9          | -0.5  | 0.824   |
| Ages 24-27                                     |                        |        |       |         |                         |        |       |         |                         |        |       |         |                         |              |       |         |
| Any food stamp participation, %                | 49.1                   | 44.8   | 4.3   | 0.119   | 43.9                    | 52.0   | -8.1  | 0.019   | 45.0                    | 48.9   | -3.9  | 0.307   | 45.9                    | 54.2         | -8.3  | 0.094   |
| 2 or more years participation in food stamp, % | 15.6                   | 18.1   | -2.5  | 0.200   | 16.5                    | 16.4   | 0.1   | 0.965   | 15.5                    | 17.1   | -1.6  | 0.529   | 15.9                    | 16.0         | -0.1  | 0.984   |
| Any TANF participation, %                      | 10.0                   | 9.4    | 0.6   | 0.587   | 9.8                     | 10.9   | -1.1  | 0.363   | 9.8                     | 10.4   | -0.6  | 0.582   | 9.8                     | 11.4         | -1.6  | 0.247   |
| 2 or more years participation in TANF, %       | 1.6                    | 2.2    | -0.6  | 0.063   | 2.0                     | 1.6    | 0.4   | 0.131   | 1.6                     | 1.6    | 0.0   | 0.862   | 1.6                     | 1.3          | 0.3   | 0.351   |
| <b>Health Status and Behavior</b>              |                        |        |       |         |                         |        |       |         |                         |        |       |         |                         |              |       |         |
| Any insurance, %                               | 75.9                   | 63.9   | 12.0  | 0.00    | 70.5                    | 73.7   | -3.1  | 0.165   | 75.7                    | 69.6   | 6.1   | 0.000   | 75.7                    | 70.9         | 4.8   | 0.485   |
| Any public insurance, %                        | 25.4                   | 20.9   | 4.5   | 0.128   | 22.2                    | 25.7   | -3.6  | 0.179   | 21.4                    | 25.2   | -3.8  | 0.070   | 23.4                    | 22.9         | 0.6   | 0.947   |

Table S9. Adjusted Means with IPW Attrition Correction and Robust Standard Errors for Adult Outcomes by Age 28 (Continued)

| Outcomes                                           | Preschool <sup>1</sup> |      |       |         | School-Age <sup>2</sup> |      |       |         | Extended-1 <sup>3</sup> |      |       |         | Extended-2 <sup>4</sup> |      |       |         |
|----------------------------------------------------|------------------------|------|-------|---------|-------------------------|------|-------|---------|-------------------------|------|-------|---------|-------------------------|------|-------|---------|
|                                                    | Interv                 | Comp | Diff. | P Value | Interv                  | Comp | Diff. | P Value | Interv                  | Comp | Diff. | P Value | Interv                  | Comp | Diff. | P Value |
| Any private insurance, %                           | 49.1                   | 39.5 | 9.6   | 0.006   | 45.6                    | 45.7 | -0.1  | 0.972   | 51.8                    | 42.2 | 9.6   | 0.001   | 50.2                    | 45.6 | 4.6   | 0.449   |
| Substance abuse (excluding alcohol), %             | 13.7                   | 18.9 | -5.2  | 0.012   | 16.1                    | 14.7 | 1.4   | 0.605   | 14.3                    | 16.2 | -1.9  | 0.484   | 14.7                    | 15.4 | -0.8  | 0.856   |
| Drug and alcohol abuse, %                          | 16.5                   | 23.0 | -6.6  | 0.004   | 18.4                    | 18.9 | -0.5  | 0.859   | 16.2                    | 20.3 | -4.2  | 0.158   | 16.7                    | 19.8 | -3.1  | 0.474   |
| <b>Crime and Justice System Involvement</b>        |                        |      |       |         |                         |      |       |         |                         |      |       |         |                         |      |       |         |
| Any adult arrest (include self-report), %          | 47.9                   | 54.3 | -6.4  | 0.033   | 52.4                    | 47.5 | 4.9   | 0.096   | 51.1                    | 49.7 | 1.4   | 0.651   | 51.8                    | 44.8 | 7.0   | 0.124   |
| Any violent charge, %                              | 17.2                   | 19.4 | -2.2  | 0.206   | 18.2                    | 17.6 | 0.6   | 0.769   | 16.6                    | 18.7 | -2.1  | 0.322   | 17.2                    | 19.4 | -2.2  | 0.206   |
| Any conviction, %                                  | 25.1                   | 28.8 | -3.7  | 0.135   | 27.0                    | 25.9 | 1.1   | 0.654   | 24.1                    | 26.7 | -2.6  | 0.295   | 24.1                    | 24.4 | -0.3  | 0.932   |
| Number of adult arrests                            | 1.7                    | 1.8  | 0.0   | 0.838   | 1.7                     | 1.8  | -0.1  | 0.462   | 1.7                     | 1.8  | -0.1  | 0.563   | 1.7                     | 1.8  | -0.1  | 0.712   |
| Any felony charge, %                               | 19.3                   | 24.6 | -5.3  | 0.021   | 21.6                    | 20.4 | 1.2   | 0.512   | 19.5                    | 21.2 | -1.7  | 0.478   | 19.5                    | 21.4 | 1.9   | 0.516   |
| Number of felony charges                           | 0.5                    | 0.6  | -0.1  | 0.167   | 0.5                     | 0.5  | 0.0   | 0.557   | 0.5                     | 0.5  | 0.0   | 0.601   | 0.5                     | 0.5  | 0.0   | 0.651   |
| Ever incarcerated or jail (include self-report), % | 15.2                   | 21.1 | -5.9  | 0.037   | 18.1                    | 16.0 | 2.1   | 0.400   | 14.9                    | 18.6 | -3.7  | 0.123   | 15.1                    | 15.9 | -0.9  | 0.795   |
| <b>Family Status</b>                               |                        |      |       |         |                         |      |       |         |                         |      |       |         |                         |      |       |         |
| Age at birth of first child                        | 19.4                   | 19.1 | 0.3   | 0.176   | 19.4                    | 19.2 | 0.2   | 0.329   | 19.5                    | 19.1 | 0.4   | 0.098   | 19.5                    | 19.1 | 0.4   | 0.193   |
| Parenthood, %                                      | 62.9                   | 63.2 | -0.3  | 0.945   | 65.7                    | 59.6 | 6.0   | 0.051   | 65.2                    | 61.7 | 3.5   | 0.332   | 65.7                    | 61.1 | 4.6   | 0.199   |
| Number of children                                 | 1.2                    | 1.3  | -0.1  | 0.518   | 1.3                     | 1.2  | 0.1   | 0.135   | 1.2                     | 1.2  | 0.0   | 0.918   | 1.2                     | 1.2  | 0.1   | 0.577   |
| Had 3 or more children, %                          | 14.5                   | 15.5 | -1.1  | 0.657   | 15.5                    | 14.1 | 1.4   | 0.525   | 15.1                    | 14.7 | 0.3   | 0.906   | 15.3                    | 14.3 | 1.1   | 0.748   |
| If married or living with partner, %               | 24.4                   | 25.5 | -1.1  | 0.679   | 26.0                    | 23.4 | 2.6   | 0.376   | 24.8                    | 24.8 | 0.0   | 0.985   | 24.5                    | 25.8 | -1.3  | 0.707   |

Note. Extended intervention-1 = CPC participation for 4 to 6 years (preschool to second or third grade) versus fewer years. Extended intervention-2 = CPC participation for 4 to 6 years versus participation in preschool and kindergarten only.

1. Adjusted for school-age participation, 8 indicators of preprogram risk status, sex of child, race/ethnicity, child welfare history by age 4, and a dummy-coded variable for missing data on risk status. School poverty is replaced with neighborhood poverty at 1980. Home environment at ages 0-5 is included. Robust standard errors were used. Attrition was adjusted through including inverse probability weighting (IPW) of being in the study sample as a sampling weight in the model.
2. Adjusted for preschool participation, 8 indicators of preprogram risk status, sex of child, race/ethnicity, child welfare history by age 4, and a dummy-coded variable for missing data on risk status. School poverty is replaced with neighborhood poverty at 1980. Home environment at ages 0-5 is included. Robust standard errors were used. Attrition was adjusted through including IPW of being in the study sample as a sampling weight in the model.
3. Adjusted for 8 indicators of preprogram risk status, sex of child, race/ethnicity, child welfare history by age 4, and a dummy-coded variable for missing data on risk status. School poverty is replaced with neighborhood poverty at 1980. Home environment at ages 0-5 is included. Robust standard errors were used. Attrition was adjusted through including IPW of being in the study sample as a sampling weight in the model.
4. Adjusted for 8 indicators of preprogram risk status, sex of child, race/ethnicity, child welfare history by age 4, a dummy-coded variable for missing data on risk status, and word analysis scores at kindergarten. School poverty is replaced with neighborhood poverty at 1980. Home environment at ages 0-5 is included. Robust standard errors were used. Attrition was adjusted through including inverse probability weighting (IPW) of being in the study sample as a sampling weight in the model.

\*Sample sizes vary by measures: occupational prestige by age 24 (N=1,335); SES ages 24-27 (N=1,265), adult crime by age 26 (N=1,473). The sample sizes for the family status outcomes except marital status (N=1,127) are 1,233.

Table S10. Unadjusted Means by Subgroups and Program Components

| Outcome and subgroup                   | Preschool |       |       |         | School-Age |       |       |         | Extended-1 |       |       |         | Extended-2 |              |        |         |
|----------------------------------------|-----------|-------|-------|---------|------------|-------|-------|---------|------------|-------|-------|---------|------------|--------------|--------|---------|
|                                        | Interv    | Comp  | Diff. | P Value | Interv     | Comp  | Diff. | p Value | Interv     | Comp  | Diff. | P Value | Interv     | Comp, PK + K | Diff.  | P Value |
| <b>A. High school completion, %</b>    |           |       |       |         |            |       |       |         |            |       |       |         |            |              |        |         |
| Female                                 | 84.06     | 82.48 | 1.58  | 0.594   | 87.16      | 78.85 | 8.31  | 0.003   | 87.64      | 80.88 | 6.76  | 0.016   | 87.64      | 75.18        | 12.46  | 0.001   |
| Male                                   | 75.90     | 63.60 | 12.30 | 0.001   | 70.73      | 71.96 | -1.23 | 0.728   | 74.57      | 69.52 | 5.05  | 0.168   | 74.57      | 78.46        | -3.89  | 0.001   |
| Mother completed HS                    | 85.84     | 82.50 | 3.34  | 0.277   | 85.71      | 83.52 | 2.19  | 0.446   | 87.64      | 82.80 | 4.84  | 0.091   | 87.64      | 84.25        | 3.39   | 0.360   |
| Mother not completed HS                | 74.84     | 65.85 | 8.99  | 0.009   | 73.23      | 69.21 | 4.02  | 0.229   | 75.41      | 69.33 | 6.08  | 0.083   | 75.41      | 70.14        | 5.27   | 0.257   |
| 4 or more risks                        | 77.37     | 69.88 | 7.49  | 0.010   | 76.77      | 72.22 | 4.55  | 0.102   | 79.13      | 72.25 | 6.88  | 0.015   | 79.13      | 73.79        | 5.34   | 0.145   |
| Less than 4 risks                      | 88.12     | 79.58 | 8.54  | 0.025   | 86.19      | 83.52 | 2.67  | 0.466   | 88.36      | 82.92 | 5.44  | 0.145   | 88.36      | 86.16        | 2.20   | 0.655   |
| Adverse home environment               | 79.51     | 76.92 | 2.59  | 0.704   | 82.57      | 72.31 | 10.26 | 0.113   | 87.14      | 73.08 | 14.06 | 0.025   | 87.14      | 68.75        | 18.39  | 0.032   |
| No adverse home environment            | 80.41     | 72.22 | 8.19  | 0.001   | 78.79      | 75.87 | 2.92  | 0.227   | 80.90      | 75.49 | 5.41  | 0.029   | 80.90      | 77.82        | 3.08   | 0.341   |
| <b>B. 4-year college attendance, %</b> |           |       |       |         |            |       |       |         |            |       |       |         |            |              |        |         |
| Female                                 | 17.60     | 13.68 | 3.92  | 0.180   | 17.77      | 14.42 | 3.35  | 0.227   | 20.14      | 13.82 | 6.32  | 0.026   | 20.14      | 14.18        | 5.96   | 0.131   |
| Male                                   | 11.33     | 7.60  | 3.73  | 0.117   | 10.30      | 9.46  | 0.84  | 0.719   | 10.35      | 9.70  | 0.65  | 0.791   | 10.35      | 13.08        | -2.73  | 0.434   |
| Mother completed HS                    | 17.53     | 18.00 | -0.47 | 0.885   | 19.05      | 15.73 | 3.32  | 0.276   | 20.22      | 15.87 | 4.35  | 0.155   | 20.22      | 13.38        | 6.84   | 0.096   |
| Mother not completed HS                | 11.92     | 5.28  | 6.64  | 0.002   | 9.60       | 9.09  | 0.51  | 0.814   | 10.89      | 8.59  | 2.30  | 0.315   | 10.89      | 13.89        | -3.00  | 0.380   |
| 4 or more risks                        | 12.69     | 8.19  | 4.50  | 0.031   | 12.59      | 9.26  | 3.33  | 0.097   | 13.28      | 9.89  | 3.39  | 0.103   | 13.28      | 12.14        | 1.14   | 0.694   |
| Less than 4 risks                      | 20.08     | 16.20 | 3.88  | 0.343   | 18.57      | 18.75 | -0.18 | 0.964   | 21.92      | 16.67 | 5.25  | 0.201   | 21.92      | 18.46        | 3.46   | 0.567   |
| Adverse home environment               | 13.94     | 17.31 | -3.37 | 0.571   | 17.43      | 10.77 | 6.66  | 0.230   | 17.14      | 13.46 | 3.68  | 0.506   | 17.14      | 9.37         | 7.77   | 0.298   |
| No adverse home environment            | 14.82     | 9.72  | 5.10  | 0.011   | 13.68      | 12.15 | 1.53  | 0.431   | 15.50      | 11.53 | 3.97  | 0.049   | 15.50      | 14.22        | 1.28   | 0.655   |
| <b>C. BA or AA degree, %</b>           |           |       |       |         |            |       |       |         |            |       |       |         |            |              |        |         |
| Female                                 | 11.38     | 10.68 | 0.70  | 0.779   | 12.59      | 9.29  | 3.30  | 0.163   | 13.78      | 9.45  | 4.33  | 0.074   | 13.78      | 7.09         | 6.69   | 0.040   |
| Male                                   | 5.06      | 4.80  | 0.26  | 0.881   | 4.61       | 5.41  | -0.80 | 0.638   | 4.31       | 5.31  | -1.00 | 0.569   | 4.31       | 6.15         | -1.84  | 0.443   |
| Mother completed HS                    | 11.01     | 13.00 | -1.99 | 0.469   | 11.64      | 11.61 | 0.03  | 0.991   | 12.36      | 11.11 | 1.25  | 0.627   | 12.36      | 8.66         | 3.70   | 0.272   |
| Mother not completed HS                | 5.96      | 3.87  | 2.09  | 0.210   | 6.07       | 4.11  | 1.96  | 0.231   | 6.45       | 4.50  | 1.95  | 0.262   | 6.45       | 4.86         | 1.59   | 0.516   |
| 4 or more risks                        | 7.04      | 4.68  | 2.36  | 0.141   | 7.27       | 4.86  | 2.41  | 0.118   | 7.59       | 5.42  | 2.17  | 0.175   | 7.59       | 6.31         | 1.28   | 0.567   |
| Less than 4 risks                      | 12.30     | 14.79 | -2.49 | 0.487   | 12.86      | 13.64 | -0.78 | 0.822   | 14.38      | 12.50 | 1.88  | 0.597   | 14.38      | 7.69         | 6.69   | 0.167   |
| Adverse home environment               | 8.20      | 5.77  | 2.43  | 0.574   | 9.08       | 4.62  | 4.46  | 0.265   | 8.57       | 6.73  | 1.84  | 0.652   | 8.57       | 6.25         | 2.32   | 0.683   |
| No adverse home environment            | 8.50      | 7.87  | 0.63  | 0.701   | 8.72       | 7.73  | 0.99  | 0.535   | 9.66       | 7.47  | 2.19  | 0.185   | 9.66       | 6.69         | 2.97   | 0.184   |
| <b>D. SES ≥ 4, %</b>                   |           |       |       |         |            |       |       |         |            |       |       |         |            |              |        |         |
| Female                                 | 42.29     | 36.45 | 5.84  | 0.150   | 42.55      | 37.67 | 4.88  | 0.202   | 44.49      | 37.78 | 6.71  | 0.085   | 44.49      | 38.06        | 6.43   | 0.220   |
| Male                                   | 29.16     | 22.61 | 6.55  | 0.077   | 26.73      | 26.52 | 0.21  | 0.954   | 30.29      | 24.68 | 5.61  | 0.141   | 30.29      | 28.83        | 1.46   | 0.786   |
| Mother completed HS                    | 44.72     | 39.89 | 4.83  | 0.274   | 43.98      | 42.08 | 1.90  | 0.648   | 45.14      | 41.86 | 3.28  | 0.432   | 45.14      | 43.36        | 1.78   | 0.753   |
| Mother not completed HS                | 28.61     | 21.84 | 6.77  | 0.049   | 26.90      | 25.00 | 1.90  | 0.572   | 31.19      | 23.33 | 7.86  | 0.027   | 31.19      | 25.76        | 5.43   | 0.271   |
| 4 or more risks                        | 32.79     | 24.06 | 8.73  | 0.006   | 32.56      | 26.13 | 6.43  | 0.034   | 35.98      | 26.12 | 9.86  | 0.002   | 35.98      | 27.65        | 8.33   | 0.051   |
| Less than 4 risks                      | 46.37     | 42.19 | 4.18  | 0.450   | 42.10      | 48.10 | -6.00 | 0.236   | 43.94      | 45.37 | -1.43 | 0.794   | 43.94      | 54.39        | -10.45 | 0.187   |
| Adverse home environment               | 27.77     | 24.44 | 3.33  | 0.670   | 29.90      | 21.43 | 8.47  | 0.252   | 30.15      | 24.44 | 5.71  | 0.433   | 30.15      | 22.22        | 7.93   | 0.438   |
| No adverse home environment            | 37.72     | 29.82 | 7.90  | 0.008   | 35.95      | 33.60 | 2.35  | 0.414   | 39.46      | 32.24 | 7.22  | 0.015   | 39.46      | 35.32        | 4.14   | 0.309   |

Table S10. Unadjusted Means by Subgroups and Program Components (Continued)

| Outcome and subgroup                                 | Preschool |       |        |         | School-Age |       |       |         | Extended-1 |       |       |         | Extended-2 |       |       |         |
|------------------------------------------------------|-----------|-------|--------|---------|------------|-------|-------|---------|------------|-------|-------|---------|------------|-------|-------|---------|
|                                                      | Interv    | Comp  | Diff.  | P Value | Interv     | Comp  | Diff. | P Value | Interv     | Comp  | Diff. | P Value | Interv     | Comp  | Diff. | P Value |
| <b>E. Average annual income</b>                      |           |       |        |         |            |       |       |         |            |       |       |         |            |       |       |         |
| Female                                               | 12467     | 11882 | 585    | 0.441   | 12392      | 12131 | 261   | 0.715   | 12807      | 11933 | 874   | 0.229   | 12807      | 12218 | 589   | 0.541   |
| Male                                                 | 10644     | 9607  | 1037   | 0.199   | 10157      | 10359 | -202  | 0.798   | 11002      | 9845  | 1157  | 0.161   | 11002      | 10565 | 437   | 0.704   |
| Mother completed HS                                  | 12957     | 12673 | 284    | 0.750   | 13003      | 12682 | 321   | 0.702   | 13247      | 12605 | 642   | 0.445   | 13247      | 12671 | 576   | 0.612   |
| Mother not completed HS                              | 10442     | 9393  | 1049   | 0.127   | 9866       | 10242 | -376  | 0.575   | 10787      | 9652  | 1135  | 0.108   | 10787      | 10429 | 358   | 0.708   |
| 4 or more risks                                      | 10902     | 9441  | 1461   | 0.019   | 10693      | 10018 | 675   | 0.258   | 11546      | 9730  | 1816  | 0.003   | 11546      | 10208 | 1338  | 0.101   |
| Less than 4 risks                                    | 13718     | 13883 | -165   | 0.883   | 13084      | 14490 | -1406 | 0.196   | 13188      | 14049 | -861  | 0.439   | 13188      | 15691 | -2503 | 0.125   |
| Adverse home environment                             | 10193     | 9922  | 271    | 0.869   | 10094      | 10137 | -43   | 0.979   | 10738      | 9659  | 1079  | 0.481   | 10738      | 10152 | 586   | 0.789   |
| No adverse home environment                          | 11871     | 10820 | 1051   | 0.075   | 11557      | 11421 | 136   | 0.811   | 12220      | 11076 | 1144  | 0.051   | 12220      | 11616 | 604   | 0.445   |
| <b>F. Any food stamp participation ages 24-27, %</b> |           |       |        |         |            |       |       |         |            |       |       |         |            |       |       |         |
| Female                                               | 64.13     | 61.67 | 2.46   | 0.530   | 62.22      | 64.77 | -2.55 | 0.491   | 64.00      | 62.86 | 1.14  | 0.762   | 64.00      | 68.22 | -4.22 | 0.405   |
| Male                                                 | 31.37     | 31.67 | -0.30  | 0.938   | 31.05      | 33.33 | -3.28 | 0.373   | 26.89      | 34.15 | -7.26 | 0.054   | 26.89      | 36.36 | -9.47 | 0.066   |
| Mother completed HS                                  | 45.27     | 37.50 | 7.77   | 0.070   | 42.55      | 43.36 | -0.81 | 0.840   | 43.56      | 42.38 | 1.18  | 0.769   | 42.56      | 48.74 | -5.18 | 0.346   |
| Mother not completed HS                              | 52.18     | 52.36 | -0.18  | 0.963   | 50.52      | 54.32 | -3.80 | 0.312   | 50.20      | 53.36 | -3.16 | 0.421   | 50.20      | 56.49 | -6.29 | 0.243   |
| 4 or more risks                                      | 51.26     | 50.15 | 1.11   | 0.744   | 49.18      | 53.13 | -3.95 | 0.225   | 48.77      | 52.18 | -3.41 | 0.304   | 48.77      | 55.44 | -6.67 | 0.134   |
| Less than 4 risks                                    | 41.88     | 36.96 | 4.92   | 0.349   | 39.90      | 40.24 | -0.34 | 0.947   | 41.78      | 38.94 | 2.84  | 0.585   | 41.78      | 43.86 | -2.08 | 0.788   |
| Adverse home environment                             | 50.00     | 45.65 | 4.35   | 0.620   | 48.51      | 49.09 | -0.58 | 0.945   | 47.76      | 49.44 | -1.68 | 0.836   | 47.76      | 50.00 | -2.24 | 0.851   |
| No adverse home environment                          | 48.55     | 46.32 | 2.23   | 0.462   | 46.33      | 49.52 | -3.19 | 0.275   | 46.64      | 48.43 | -1.79 | 0.550   | 46.64      | 53.10 | -6.46 | 0.114   |
| <b>G. Substance abuse (excluding alcohol), %</b>     |           |       |        |         |            |       |       |         |            |       |       |         |            |       |       |         |
| Female                                               | 4.85      | 5.69  | -0.84  | 0.626   | 5.78       | 4.29  | 1.49  | 0.361   | 5.93       | 4.63  | 1.30  | 0.437   | 5.93       | 4.80  | 1.13  | 0.626   |
| Male                                                 | 34.29     | 42.96 | -8.67  | 0.019   | 36.74      | 38.63 | -1.89 | 0.601   | 33.60      | 39.71 | -6.11 | 0.103   | 33.60      | 36.96 | -3.36 | 0.504   |
| Mother completed HS                                  | 17.73     | 21.80 | -4.07  | 0.214   | 17.63      | 20.92 | -3.29 | 0.283   | 16.55      | 20.70 | -4.15 | 0.174   | 16.55      | 21.05 | -4.50 | 0.269   |
| Mother not completed HS                              | 20.12     | 27.88 | -7.76  | 0.012   | 24.47      | 21.64 | 2.83  | 0.346   | 21.51      | 24.01 | -2.50 | 0.430   | 21.51      | 19.87 | 1.64  | 0.691   |
| 4 or more risks                                      | 18.11     | 26.42 | -8.31  | 0.002   | 21.45      | 20.39 | 1.06  | 0.673   | 18.77      | 22.27 | -3.50 | 0.175   | 18.77      | 18.98 | -0.21 | 0.948   |
| Less than 4 risks                                    | 21.26     | 23.03 | -1.77  | 0.678   | 20.46      | 23.66 | -3.20 | 0.438   | 19.48      | 23.41 | -3.93 | 0.351   | 19.48      | 25.00 | -5.52 | 0.357   |
| Adverse home environment                             | 29.59     | 30.36 | -0.77  | 0.918   | 31.53      | 27.14 | 4.39  | 0.529   | 31.43      | 28.83 | 2.60  | 0.710   | 31.43      | 28.57 | 2.86  | 0.764   |
| No adverse home environment                          | 17.33     | 24.84 | -7.51  | 0.001   | 19.58      | 20.62 | -1.04 | 0.642   | 17.12      | 21.73 | -4.61 | 0.045   | 17.12      | 19.27 | -2.15 | 0.474   |
| <b>H. Any felony charge, %</b>                       |           |       |        |         |            |       |       |         |            |       |       |         |            |       |       |         |
| Female                                               | 2.83      | 6.91  | -4.08  | 0.011   | 4.09       | 4.29  | -0.20 | 0.894   | 3.49       | 4.63  | -1.14 | 0.448   | 3.49       | 2.06  | 1.43  | 0.407   |
| Male                                                 | 37.14     | 42.24 | -5.10  | 0.171   | 39.17      | 38.94 | 0.23  | 0.949   | 37.50      | 39.92 | -2.42 | 0.523   | 37.50      | 35.51 | 1.99  | 0.695   |
| Mother completed HS                                  | 17.09     | 17.06 | 0.03   | 0.992   | 17.63      | 16.31 | 1.32  | 0.652   | 16.91      | 17.21 | -0.30 | 0.918   | 16.91      | 15.79 | 1.12  | 0.775   |
| Mother not completed HS                              | 21.37     | 31.41 | -10.04 | 0.002   | 25.18      | 25.48 | -0.30 | 0.922   | 22.26      | 26.84 | -4.58 | 0.160   | 22.26      | 20.53 | 1.73  | 0.679   |
| 4 or more risks                                      | 19.11     | 27.49 | -8.38  | 0.002   | 22.11      | 21.91 | 0.20  | 0.937   | 19.28      | 23.60 | -4.32 | 0.100   | 19.28      | 18.98 | 0.30  | 0.929   |
| Less than 4 risks                                    | 19.68     | 21.05 | -1.37  | 0.740   | 20.00      | 20.43 | -0.43 | 0.914   | 20.13      | 20.24 | -0.11 | 0.979   | 20.13      | 16.18 | 3.95  | 0.486   |
| Adverse home environment                             | 25.60     | 30.36 | -4.76  | 0.507   | 26.12      | 28.57 | -2.45 | 0.719   | 27.15      | 27.03 | 0.12  | 0.986   | 27.15      | 22.86 | 4.29  | 0.635   |
| No adverse home environment                          | 18.30     | 25.05 | -6.75  | 0.004   | 20.84      | 20.62 | 0.22  | 0.924   | 18.39      | 22.10 | -3.71 | 0.112   | 18.39      | 17.67 | 0.72  | 0.811   |

Table S11. Adjusted Means for Selected Adult Outcomes by Subgroups and Program Components

| Outcome and subgroup                | Preschool |      |       |       | School-Age |      |       |       | Extended-1 |      |       |       | Extended-2 |        |       |       |
|-------------------------------------|-----------|------|-------|-------|------------|------|-------|-------|------------|------|-------|-------|------------|--------|-------|-------|
|                                     | Interv    | Comp |       | P     | Interv     | Comp | Diff. | p     | Interv     | Comp |       | P     | Interv     | Comp,  | Diff. | P     |
|                                     |           |      | Diff. | Value |            |      |       | Value |            |      | Diff. | Value |            | PK + K |       | Value |
| <b>A. High school completion, %</b> |           |      |       |       |            |      |       |       |            |      |       |       |            |        |       |       |
| Female                              | 85.4      | 86.9 | -1.5  | 0.592 | 89.3       | 80.8 | 8.5   | 0.022 | 88.8       | 83.6 | 5.2   | 0.043 | 88.0       | 81.6   | 6.4   | 0.065 |
| Male                                | 77.5      | 63.5 | 14.1  | 0.002 | 70.0       | 75.7 | -5.8  | 0.096 | 75.6       | 70.4 | 5.2   | 0.241 | 74.0       | 79.7   | -5.7  | 0.312 |
| Mother completed HS                 | 86.7      | 84.9 | 1.8   | 0.525 | 87.4       | 84.4 | 2.9   | 0.372 | 88.7       | 84.3 | 4.4   | 0.197 | 88.1       | 85.4   | 2.8   | 0.487 |
| Mother not completed HS             | 76.8      | 66.0 | 10.8  | 0.002 | 72.8       | 72.7 | 0.1   | 0.972 | 77.1       | 70.3 | 6.8   | 0.020 | 75.4       | 74.1   | 1.3   | 0.754 |
| 4 or more risks                     | 76.9      | 70.8 | 6.1   | 0.026 | 75.8       | 73.6 | 2.2   | 0.412 | 78.6       | 72.6 | 6.0   | 0.006 | 77.1       | 75.3   | 1.7   | 0.576 |
| Less than 4 risks                   | 90.7      | 80.0 | 10.7  | 0.003 | 87.0       | 87.8 | -0.8  | 0.811 | 89.7       | 85.1 | 4.6   | 0.187 | 89.0       | 88.0   | 0.9   | 0.821 |
| High neighborhood poverty           | 79.6      | 71.8 | 7.8   | 0.006 | 79.3       | 74.9 | 4.4   | 0.200 | 80.7       | 75.2 | 5.5   | 0.119 | 79.4       | 78.6   | 0.9   | 0.847 |
| Low neighborhood poverty            | 84.4      | 78.6 | 5.7   | 0.097 | 81.7       | 82.3 | -0.6  | 0.849 | 85.2       | 80.2 | 5.0   | 0.115 | 84.1       | 80.7   | 3.3   | 0.450 |
| Adverse home environment            | 83.8      | 88.0 | -4.1  | 0.501 | 88.8       | 77.4 | 11.4  | 0.034 | 90.5       | 80.3 | 10.2  | 0.065 | 90.2       | 77.7   | 12.5  | 0.028 |
| No adverse home environment         | 81.9      | 74.1 | 7.8   | 0.004 | 79.1       | 79.5 | -0.5  | 0.847 | 81.8       | 77.6 | 4.2   | 0.078 | 80.5       | 81.0   | -0.5  | 0.881 |
| Single parent                       | 79.2      | 74.3 | 4.8   | 0.123 | 78.4       | 76.4 | 2.0   | 0.344 | 80.3       | 75.8 | 4.5   | 0.082 | 79.1       | 77.1   | 2.0   | 0.548 |
| Not single parent                   | 89.4      | 77.9 | 11.5  | 0.000 | 86.1       | 85.5 | 0.5   | 0.889 | 90.5       | 82.3 | 8.3   | 0.003 | 89.2       | 87.9   | 1.3   | 0.805 |
| 1 year CPC preschool                | n.a.      | n.a. | n.a.  | n.a.  | 84.4       | 80.0 | 4.4   | 0.324 | 84.2       | 81.5 | 2.7   | 0.470 | 83.7       | 81.8   | 1.9   | 0.694 |
| 2 year CPC preschool                | n.a.      | n.a. | n.a.  | n.a.  | 84.3       | 79.6 | 4.6   | 0.101 | 84.6       | 80.6 | 4.0   | 0.162 | 84.2       | 81.9   | 2.3   | 0.340 |
| African American                    | 80.4      | 74.9 | 5.5   | 0.030 | 79.3       | 77.5 | 1.9   | 0.431 | 81.8       | 76.5 | 5.3   | 0.021 | 80.5       | 78.1   | 2.4   | 0.464 |
| Hispanic                            | 98.9      | 92.9 | 6.0   | 0.004 | 97.9       | 97.5 | 0.4   | 0.750 | 99.5       | 95.0 | 4.5   | 0.011 | 99.5       | 96.3   | 3.2   | 0.054 |
| <b>B. SES ≥ 4, %</b>                |           |      |       |       |            |      |       |       |            |      |       |       |            |        |       |       |
| Female                              | 40.9      | 37.7 | 3.2   | 0.465 | 41.2       | 38.2 | 3.0   | 0.487 | 42.1       | 38.5 | 3.6   | 0.376 | 41.1       | 38.2   | 2.9   | 0.608 |
| Male                                | 28.4      | 20.8 | 7.6   | 0.082 | 25.4       | 25.4 | 0.1   | 0.984 | 30.0       | 23.0 | 7.0   | 0.004 | 29.4       | 25.6   | 3.8   | 0.368 |
| Mother completed HS                 | 42.5      | 40.6 | 1.9   | 0.633 | 43.7       | 39.5 | 4.2   | 0.196 | 43.4       | 40.9 | 2.4   | 0.556 | 43.1       | 39.1   | 4.0   | 0.409 |
| Mother not completed HS             | 28.2      | 20.2 | 8.0   | 0.016 | 24.4       | 25.5 | -1.1  | 0.784 | 30.1       | 22.6 | 7.5   | 0.051 | 28.6       | 26.5   | 2.1   | 0.631 |
| 4 or more risks                     | 30.9      | 24.7 | 6.2   | 0.022 | 30.1       | 26.7 | 3.4   | 0.303 | 33.8       | 25.9 | 7.9   | 0.008 | 32.8       | 27.3   | 5.5   | 0.136 |
| Less than 4 risks                   | 48.6      | 37.6 | 11.0  | 0.065 | 41.5       | 48.1 | -6.7  | 0.281 | 43.7       | 45.0 | -1.3  | 0.797 | 42.5       | 49.3   | -6.8  | 0.313 |
| High neighborhood poverty           | 32.6      | 26.6 | 6.0   | 0.123 | 33.2       | 27.6 | 5.6   | 0.107 | 33.7       | 29.2 | 4.5   | 0.180 | 33.2       | 27.6   | 5.6   | 0.107 |
| Low neighborhood poverty            | 37.1      | 29.3 | 7.8   | 0.132 | 32.0       | 35.3 | -3.3  | 0.577 | 38.1       | 31.3 | 6.8   | 0.062 | 36.6       | 36.6   | 0.0   | 0.995 |
| Adverse home environment            | 25.3      | 26.8 | -1.5  | 0.853 | 29.7       | 20.1 | 9.7   | 0.269 | 29.5       | 23.6 | 5.8   | 0.477 | 27.7       | 20.1   | 7.6   | 0.502 |
| No adverse home environment         | 35.4      | 29.1 | 6.4   | 0.026 | 32.7       | 33.6 | -0.9  | 0.777 | 36.2       | 31.3 | 4.9   | 0.105 | 35.5       | 33.6   | 1.9   | 0.596 |
| Single parent                       | 31.5      | 25.1 | 6.4   | 0.041 | 30.3       | 27.8 | 2.5   | 0.498 | 34.3       | 26.4 | 7.8   | 0.009 | 33.5       | 27.5   | 6.1   | 0.126 |
| Not single parent                   | 45.2      | 39.6 | 5.6   | 0.282 | 42.2       | 44.4 | -2.2  | 0.714 | 41.7       | 43.8 | -2.2  | 0.678 | 40.0       | 46.8   | -6.8  | 0.321 |
| 1 year CPC preschool                | n.a.      | n.a. | n.a.  | n.a.  | 35.9       | 30.7 | 5.2   | 0.436 | 35.3       | 32.9 | 2.4   | 0.702 | 35.0       | 30.9   | 4.2   | 0.560 |
| 2 year CPC preschool                | n.a.      | n.a. | n.a.  | n.a.  | 36.1       | 35.0 | 1.1   | 0.763 | 36.8       | 34.3 | 2.5   | 0.556 | 36.7       | 35.1   | 1.6   | 0.688 |
| African American                    | 32.1      | 27.6 | 4.5   | 0.112 | 30.5       | 30.4 | 0.1   | 0.982 | 33.0       | 29.0 | 4.0   | 0.136 | 32.2       | 29.8   | 2.4   | 0.510 |
| Hispanic                            | 66.5      | 67.0 | -0.5  | 0.946 | 82.2       | 45.6 | 36.6  | 0.005 | 83.3       | 50.0 | 33.3  | 0.015 | 80.1       | 48.9   | 31.3  | 0.031 |

Table S11. Adjusted Means for Selected Adult Outcomes by Subgroups and Program Components (Continued)

| Outcome and subgroup                             | Preschool |      |       |         | School-Age |      |       |         | Extended-1 |      |       |         | Extended-2 |      |       |         |
|--------------------------------------------------|-----------|------|-------|---------|------------|------|-------|---------|------------|------|-------|---------|------------|------|-------|---------|
|                                                  | Interv    | Comp | Diff. | P Value | Interv     | Comp | Diff. | P Value | Interv     | Comp | Diff. | P Value | Interv     | Comp | Diff. | P Value |
| <b>C. Substance abuse (excluding alcohol), %</b> |           |      |       |         |            |      |       |         |            |      |       |         |            |      |       |         |
| Female                                           | 3.9       | 4.8  | -1.0  | 0.601   | 4.9        | 3.4  | 1.6   | 0.453   | 5.3        | 3.5  | 1.7   | 0.357   | 5.2        | 3.8  | 1.4   | 0.646   |
| Male                                             | 33.7      | 42.9 | -9.2  | 0.002   | 37.3       | 36.7 | 0.6   | 0.878   | 32.7       | 39.5 | -6.7  | 0.135   | 33.5       | 37.7 | -4.2  | 0.501   |
| Mother completed HS                              | 12.6      | 12.6 | 0.0   | 1.000   | 11.0       | 15.1 | -4.0  | 0.226   | 11.1       | 13.9 | -2.7  | 0.425   | 11.1       | 16.3 | -5.2  | 0.183   |
| Mother not completed HS                          | 13.5      | 23.0 | -9.4  | 0.000   | 19.4       | 14.1 | 5.3   | 0.087   | 15.9       | 17.8 | -2.0  | 0.607   | 16.6       | 13.0 | 3.5   | 0.539   |
| 4 or more risks                                  | 13.2      | 20.7 | -7.4  | 0.000   | 17.2       | 13.8 | 3.4   | 0.207   | 14.8       | 16.4 | -1.6  | 0.616   | 15.1       | 13.4 | 1.7   | 0.695   |
| Less than 4 risks                                | 15.1      | 15.8 | -0.7  | 0.878   | 13.1       | 18.4 | -5.3  | 0.193   | 13.2       | 17.1 | -3.9  | 0.292   | 13.7       | 21.2 | -7.5  | 0.150   |
| High neighborhood poverty                        | 12.8      | 22.1 | -9.2  | 0.001   | 16.0       | 13.7 | 2.3   | 0.496   | 13.9       | 16.3 | -2.4  | 0.537   | 14.0       | 13.1 | 0.9   | 0.869   |
| Low neighborhood poverty                         | 15.0      | 15.7 | -0.7  | 0.808   | 14.7       | 16.0 | -1.3  | 0.626   | 14.3       | 15.8 | -1.6  | 0.669   | 14.8       | 18.6 | -3.8  | 0.390   |
| Adverse home environment                         | 14.8      | 24.0 | -9.2  | 0.264   | 18.7       | 14.9 | 3.8   | 0.651   | 15.3       | 19.2 | -3.9  | 0.610   | 15.4       | 13.8 | 1.6   | 0.889   |
| No adverse home environment                      | 12.5      | 17.6 | -5.0  | 0.018   | 14.8       | 13.5 | 1.3   | 0.630   | 13.1       | 15.0 | -2.0  | 0.514   | 13.3       | 14.4 | -1.0  | 0.816   |
| Single parent                                    | 13.2      | 18.1 | -4.9  | 0.034   | 16.2       | 13.2 | 3.0   | 0.243   | 13.9       | 15.4 | -1.5  | 0.606   | 14.4       | 14.8 | -0.4  | 0.924   |
| Not single parent                                | 14.2      | 19.9 | -5.7  | 0.227   | 14.1       | 19.0 | -4.9  | 0.321   | 15.3       | 17.3 | -2.0  | 0.645   | 14.9       | 16.0 | -1.1  | 0.881   |
| 1 year CPC preschool                             | n.a.      | n.a. | n.a.  | n.a.    | 14.2       | 14.1 | 0.0   | 0.998   | 15.6       | 12.5 | 3.1   | 0.310   | 15.6       | 14.0 | 1.6   | 0.666   |
| 2 year CPC preschool                             | n.a.      | n.a. | n.a.  | n.a.    | 11.6       | 14.9 | -3.3  | 0.483   | 12.5       | 12.5 | 0.0   | 0.996   | 12.5       | 14.6 | -2.2  | 0.639   |
| African American                                 | 14.1      | 0.0  | -5.2  | 0.012   | 16.3       | 15.2 | 1.1   | 0.704   | 14.4       | 16.7 | -2.3  | 0.404   | 14.8       | 16.4 | -1.6  | 0.714   |
| Hispanic                                         | 3.8       | 0.7  | 3.1   | 0.303   | 1.6        | 4.0  | -2.4  | 0.338   | 5.1        | 1.4  | 3.7   | 0.026   | 4.6        | 0.2  | 4.4   | 0.294   |
| <b>D. Any felony charge, %</b>                   |           |      |       |         |            |      |       |         |            |      |       |         |            |      |       |         |
| Female                                           | 2.0       | 6.1  | -4.1  | 0.005   | 3.4        | 2.6  | 0.8   | 0.486   | 3.1        | 4.8  | -1.7  | 0.478   | 2.8        | 0.9  | 1.9   | 0.398   |
| Male                                             | 36.5      | 42.1 | -5.6  | 0.172   | 39.1       | 37.9 | 1.2   | 0.725   | 19.5       | 21.8 | -2.3  | 0.392   | 37.6       | 36.1 | 1.5   | 0.792   |
| Mother completed HS                              | 10.9      | 9.7  | 1.1   | 0.661   | 10.3       | 10.7 | -0.4  | 0.840   | 11.8       | 13.7 | -2.0  | 0.403   | 10.9       | 9.8  | 1.1   | 0.747   |
| Mother not completed HS                          | 13.9      | 25.2 | -11.4 | 0.000   | 18.7       | 16.9 | 1.8   | 0.446   | 15.0       | 17.0 | -2.0  | 0.403   | 15.6       | 12.9 | 2.7   | 0.544   |
| 4 or more risks                                  | 13.1      | 20.8 | -7.7  | 0.000   | 16.5       | 14.4 | 2.1   | 0.268   | 13.7       | 15.5 | -1.8  | 0.468   | 14.3       | 12.1 | 2.2   | 0.446   |
| Less than 4 risks                                | 12.2      | 13.0 | -0.8  | 0.863   | 11.9       | 13.3 | -1.4  | 0.637   | 14.3       | 16.1 | -1.8  | 0.468   | 13.6       | 11.1 | 2.5   | 0.590   |
| High neighborhood poverty                        | 13.3      | 22.3 | -9.1  | 0.004   | 16.4       | 14.1 | 2.2   | 0.349   | 13.7       | 15.3 | -1.6  | 0.484   | 14.6       | 12.4 | 2.1   | 0.591   |
| Low neighborhood poverty                         | 12.1      | 13.5 | -1.4  | 0.692   | 11.9       | 13.7 | -1.8  | 0.529   | 13.3       | 14.9 | -1.6  | 0.484   | 11.5       | 11.3 | 0.2   | 0.970   |
| Adverse home environment                         | 11.7      | 19.5 | -7.8  | 0.276   | 11.8       | 17.2 | -5.4  | 0.340   | 12.9       | 14.2 | -1.3  | 0.582   | 12.1       | 6.3  | 5.8   | 0.423   |
| No adverse home environment                      | 11.6      | 16.7 | -5.1  | 0.039   | 14.5       | 12.0 | 2.5   | 0.206   | 12.7       | 13.9 | -1.1  | 0.635   | 12.7       | 10.9 | 1.8   | 0.530   |
| Single parent                                    | 13.2      | 18.3 | -5.1  | 0.043   | 15.7       | 13.9 | 1.8   | 0.337   | 13.6       | 15.7 | -2.1  | 0.430   | 14.0       | 13.3 | 0.7   | 0.801   |
| Not single parent                                | 10.7      | 15.4 | -4.7  | 0.186   | 11.6       | 13.1 | -1.5  | 0.643   | 13.5       | 12.0 | 1.4   | 0.692   | 13.1       | 6.3  | 6.8   | 0.243   |
| 1 year CPC preschool                             | n.a.      | n.a. | n.a.  | n.a.    | 16.5       | 10.7 | 5.8   | 0.007   | 17.5       | 11.2 | 6.3   | 0.008   | 17.4       | 10.5 | 6.9   | 0.005   |
| 2 year CPC preschool                             | n.a.      | n.a. | n.a.  | n.a.    | 8.0        | 9.8  | -1.8  | 0.514   | 7.8        | 9.5  | -1.7  | 0.572   | 7.9        | 9.8  | -1.9  | 0.540   |
| African American                                 | 12.7      | 17.9 | -5.2  | 0.030   | 15.0       | 13.7 | 1.4   | 0.490   | 13.6       | 15.1 | -1.6  | 0.530   | 13.8       | 11.8 | 1.9   | 0.536   |
| Hispanic                                         | 1.8       | 2.6  | -0.8  | 0.719   | 0.9        | 5.3  | -4.4  | 0.007   | 0.6        | 4.9  | -4.3  | 0.000   | 0.7        | 4.6  | -3.9  | 0.097   |

Note. Adjusted for gender, race, individual risk indicators (birth to 3), and child welfare history by age 4. Sample sizes vary by measures.

Table S12. Adjusted Means with IPW Attrition Correction and Robust Standard Errors for Adult Outcomes by Age 28 (Dosage of Program Components)

| Outcome                                        | Preschool <sup>1</sup> |        |       |         | School-Age <sup>2</sup> |        |       |         | Extended-1 <sup>3</sup> |        |       |         | Extended-2 <sup>4</sup> |        |       |         |
|------------------------------------------------|------------------------|--------|-------|---------|-------------------------|--------|-------|---------|-------------------------|--------|-------|---------|-------------------------|--------|-------|---------|
|                                                | 2-year                 | 1-year | Diff. | P Value | 2 or 3-year             | 1 year | Diff. | p Value | 5 or 6-year             | 4-year | Diff. | P Value | 5 or 6-year             | 4 year | Diff. | P Value |
| <b>Educational Attainment</b>                  |                        |        |       |         |                         |        |       |         |                         |        |       |         |                         |        |       |         |
| On time graduation, %                          | 36.1                   | 40.4   | -4.2  | 0.273   | 41.5                    | 28.5   | 13.0  | 0.025   | 47.4                    | 42.0   | 5.4   | 0.214   | 46.3                    | 44.1   | 2.2   | 0.593   |
| High school completion, %                      | 81.7                   | 83.3   | -1.7  | 0.589   | 81.1                    | 83.5   | -2.4  | 0.488   | 84.3                    | 83.7   | 0.6   | 0.877   | 84.2                    | 84.0   | 0.2   | 0.964   |
| Highest grade completed                        | 12.1                   | 12.2   | -0.1  | 0.190   | 12.1                    | 12.1   | 0.0   | 0.782   | 12.3                    | 12.2   | 0.0   | 0.925   | 12.2                    | 12.3   | 0.0   | 0.833   |
| College attendance, %                          | 33.9                   | 33.2   | 0.7   | 0.856   | 35.1                    | 30.1   | 5.0   | 0.103   | 37.4                    | 35.0   | 2.4   | 0.606   | 37.6                    | 34.7   | 2.9   | 0.542   |
| 4-year college attendance, %                   | 13.6                   | 12.8   | 0.8   | 0.702   | 12.2                    | 11.0   | 1.2   | 0.633   | 13.2                    | 14.9   | -1.8  | 0.630   | 12.3                    | 15.5   | -3.2  | 0.401   |
| BA or AA degree, %                             | 5.7                    | 9.0    | -3.3  | 0.011   | 6.9                     | 7.4    | -0.4  | 0.827   | 6.8                     | 7.6    | -0.8  | 0.737   | 6.9                     | 8.1    | -1.2  | 0.653   |
| <b>Socioeconomic Status</b>                    |                        |        |       |         |                         |        |       |         |                         |        |       |         |                         |        |       |         |
| Occupational prestige composite (1-8)          | 2.8                    | 2.8    | 0.0   | 0.636   | 2.8                     | 2.6    | 0.2   | 0.148   | 2.9                     | 2.8    | 0.1   | 0.496   | 2.9                     | 2.8    | 0.5   | 0.754   |
| Occupational prestige ≥ 4, %                   | 28.6                   | 29.1   | -0.5  | 0.836   | 26.4                    | 22.9   | 3.5   | 0.338   | 30.4                    | 28.4   | 2.1   | 0.688   | 29.6                    | 29.6   | 0.1   | 0.988   |
| SES composite (0-8)                            | 3.0                    | 3.0    | 0.0   | 0.778   | 3.0                     | 2.8    | 0.2   | 0.144   | 3.3                     | 3.1    | 0.3   | 0.227   | 3.3                     | 3.0    | 0.2   | 0.319   |
| SES ≥ 4, %                                     | 34.5                   | 35.7   | -1.3  | 0.746   | 33.1                    | 30.9   | 2.2   | 0.484   | 38.3                    | 32.2   | 6.1   | 0.107   | 38.3                    | 32.2   | 6.1   | 0.090   |
| AA or BA or employed 8+ quarters, %            | 44.7                   | 47.4   | -2.7  | 0.443   | 44.6                    | 43.0   | 1.7   | 0.721   | 47.8                    | 46.8   | 1.1   | 0.840   | 47.9                    | 46.6   | 1.3   | 0.814   |
| Average annual income, (\$)                    | 11,394                 | 11,980 | -586  | 0.919   | 11,545                  | 10,413 | 1,132 | 0.780   | 12,328                  | 11,166 | 1,162 | 0.435   | 11,394                  | 11,980 | -586  | 0.919   |
| Average annual income 14K or higher, %         | 32.3                   | 33.4   | -1.1  | 0.746   | 31.5                    | 30.4   | 1.1   | 0.814   | 36.1                    | 28.1   | 8.0   | 0.027   | 32.3                    | 33.4   | -1.1  | 0.746   |
| Full-time employment (8 or more quarters), %   | 28.5                   | 31.7   | -3.1  | 0.300   | 33.9                    | 28.3   | 5.6   | 0.393   | 33.2                    | 25.6   | 7.6   | 0.122   | 33.1                    | 25.8   | 7.3   | 0.134   |
| <b>Public Aid</b>                              |                        |        |       |         |                         |        |       |         |                         |        |       |         |                         |        |       |         |
| Ages 18-23                                     |                        |        |       |         |                         |        |       |         |                         |        |       |         |                         |        |       |         |
| Any food stamp participation, %                | 54.1                   | 56.1   | -2.0  | 0.489   | 55.4                    | 54.0   | 1.4   | 0.804   | 53.9                    | 58.6   | -4.7  | 0.422   | 54.3                    | 57.5   | -3.2  | 0.595   |
| 2 or more years participation in food stamp, % | 19.9                   | 19.7   | 0.2   | 0.957   | 18.7                    | 19.5   | -0.8  | 0.835   | 18.1                    | 19.4   | -1.4  | 0.803   | 18.2                    | 18.9   | -0.7  | 0.898   |
| Any TANF participation, %                      | 20.3                   | 19.5   | 0.8   | 0.789   | 19.1                    | 20.9   | -1.8  | 0.710   | 20.6                    | 17.5   | 3.1   | 0.360   | 20.8                    | 16.8   | 4.0   | 0.271   |
| 2 or more years participation in TANF, %       | 7.7                    | 8.3    | -0.6  | 0.729   | 7.8                     | 5.0    | 2.8   | 0.231   | 8.6                     | 8.8    | -0.2  | 0.929   | 8.7                     | 8.3    | 0.4   | 0.818   |
| Ages 24-27                                     |                        |        |       |         |                         |        |       |         |                         |        |       |         |                         |        |       |         |
| Any food stamp participation, %                | 48.5                   | 47.4   | 1.1   | 0.764   | 45.1                    | 44.7   | 0.4   | 0.928   | 45.9                    | 45.9   | -0.1  | 0.990   | 46.2                    | 45.0   | 1.2   | 0.788   |
| 2 or more years participation in food stamp, % | 17.0                   | 15.0   | 2.0   | 0.406   | 16.4                    | 15.5   | 1.0   | 0.818   | 15.5                    | 14.1   | 1.4   | 0.753   | 15.6                    | 13.1   | 2.5   | 0.566   |
| Any TANF participation, %                      | 4.7                    | 3.7    | 0.9   | 0.448   | 2.5                     | 1.4    | 1.1   | 0.223   | 9.5                     | 4.5    | 5.1   | 0.076   | 10.2                    | 3.9    | 6.3   | 0.081   |
| 2 or more years participation in TANF, %       | 1.8                    | 1.1    | 0.7   | 0.331   | 1.8                     | 1.2    | 0.6   | 0.478   | 1.3                     | 1.2    | 0.1   | 0.910   | 2.1                     | 2.3    | -0.1  | 0.913   |
| <b>Health Status and Behavior</b>              |                        |        |       |         |                         |        |       |         |                         |        |       |         |                         |        |       |         |
| Any insurance, %                               | 76.6                   | 74.9   | 1.7   | 0.604   | 73.9                    | 68.9   | 5.0   | 0.293   | 79.9                    | 71.7   | 8.2   | 0.107   | 80.2                    | 71.2   | 9.1   | 0.068   |
| Any public insurance, %                        | 26.8                   | 24.2   | 2.7   | 0.410   | 21.2                    | 30.7   | -9.4  | 0.018   | 23.8                    | 16.0   | 7.8   | 0.190   | 24.1                    | 14.9   | 9.2   | 0.155   |

Table S12. Adjusted Means with IPW Attrition Correction and Robust Standard Errors for Adult Outcomes by Age 28 (Dosage/Program Components) (Continued)

| Outcome                                            | Preschool <sup>1</sup> |        |       |         | School-Age <sup>2</sup> |        |       |         | Extended-1 <sup>3</sup> |        |       |         | Extended-2 <sup>4</sup> |        |       |         |
|----------------------------------------------------|------------------------|--------|-------|---------|-------------------------|--------|-------|---------|-------------------------|--------|-------|---------|-------------------------|--------|-------|---------|
|                                                    | 2-year                 | 1-year | Diff. | P Value | 2-year                  | 1-year | Diff. | P Value | 2-year                  | 1-year | Diff. | P Value | 2-year                  | 1-year | Diff. | P Value |
| Any private insurance, %                           | 49.6                   | 48.7   | 0.8   | 0.735   | 49.0                    | 38.5   | 10.5  | 0.003   | 54.3                    | 48.0   | 6.3   | 0.259   | 54.2                    | 48.2   | 6.0   | 0.288   |
| Substance abuse (excluding alcohol) , %            | 13.9                   | 13.7   | 0.2   | 0.951   | 16.4                    | 11.7   | 4.6   | 0.136   | 15.6                    | 11.0   | 4.6   | 0.226   | 15.7                    | 10.3   | 5.5   | 0.135   |
| Drug and alcohol abuse, %                          | 15.4                   | 16.6   | -1.2  | 0.716   | 18.3                    | 13.0   | 5.3   | 0.12    | 16.7                    | 12.6   | 4.2   | 0.284   | 16.9                    | 11.6   | 5.4   | 0.157   |
| <b>Crime and Justice System Involvement</b>        |                        |        |       |         |                         |        |       |         |                         |        |       |         |                         |        |       |         |
| Any adult arrest (include self-report), %          | 46.5                   | 48.5   | -2.0  | 0.599   | 51.9                    | 48.9   | 2.9   | 0.513   | 46.4                    | 56.5   | -10.1 | 0.071   | 46.5                    | 56.2   | -9.8  | 0.065   |
| Any violent charge, %                              | 14.1                   | 19.3   | -5.2  | 0.019   | 16.3                    | 23.1   | -6.8  | 0.005   | 13.4                    | 20.8   | -7.4  | 0.002   | 14.1                    | 19.3   | -5.2  | 0.019   |
| Number of adult arrests                            | 1.7                    | 1.7    | 0.0   | 0.976   | 1.6                     | 1.9    | -0.3  | 0.4     | 1.5                     | 1.7    | -0.2  | 0.291   | 1.5                     | 1.7    | -0.2  | 0.353   |
| Any felony charge, %                               | 10.6                   | 13.3   | -2.7  | 0.277   | 14.2                    | 13.4   | 0.8   | 0.738   | 10.8                    | 15.8   | -4.9  | 0.113   | 10.9                    | 15.4   | -4.5  | 0.120   |
| Number of felony charges                           | 0.4                    | 0.5    | -0.1  | 0.389   | 0.5                     | 0.5    | 0.0   | 1.0     | 0.4                     | 0.5    | -0.1  | 0.332   | 0.4                     | 0.5    | -0.1  | 0.521   |
| Ever incarcerated or jail (include self-report), % | 13.8                   | 16.2   | -2.4  | 0.397   | 16.5                    | 17.9   | -1.4  | 0.611   | 13.4                    | 16.3   | -2.9  | 0.310   | 13.4                    | 16.2   | -2.8  | 0.279   |
| <b>Family Status</b>                               |                        |        |       |         |                         |        |       |         |                         |        |       |         |                         |        |       |         |
| Age at birth of first child                        | 19.5                   | 19.3   | 0.2   | 0.355   | 19.4                    | 19.3   | 0.1   | 0.877   | 19.6                    | 19.2   | 0.5   | 0.166   | 19.6                    | 19.2   | 0.4   | 0.251   |
| Parenthood, %                                      | 65.5                   | 61.0   | 4.5   | 0.268   | 65.7                    | 63.7   | 2.0   | 0.785   | 66.5                    | 61.8   | 4.7   | 0.384   | 67.5                    | 60.4   | 7.1   | 0.216   |
| Number of children                                 | 1.2                    | 1.2    | 0.0   | 0.962   | 1.3                     | 1.2    | 0.0   | 0.822   | 1.2                     | 1.3    | -0.1  | 0.634   | 1.2                     | 1.3    | 0.0   | 0.821   |
| Had 3 or more children, %                          | 14.5                   | 14.6   | -0.1  | 0.980   | 16.0                    | 14.9   | 1.2   | 0.783   | 14.9                    | 18.6   | -3.7  | 0.431   | 14.9                    | 18.3   | -3.4  | 0.482   |
| If married or living with partner, %               | 24.1                   | 25.6   | -1.5  | 0.666   | 25.1                    | 26.4   | -1.3  | 0.757   | 23.7                    | 26.3   | -2.6  | 0.532   | 23.7                    | 26.3   | -2.6  | 0.542   |

- Note. 1. Adjusted for school-age participation, 8 indicators of preprogram risk status, sex of child, race/ethnicity, child welfare history by age 4, and a dummy-coded variable for missing data on risk status. School poverty among the 8 indicators of risk status was replaced with neighborhood poverty at 1980. Home environment at ages 0-5 was included. Robust standard errors were used. Inverse probability weighting (IPW) of being in the study sample was created, and was used as a sampling weight in the model to adjust for attrition. Sample sizes vary by measures.
2. Adjusted for CPC preschool participation, 8 indicators of preprogram risk status, sex of child, race/ethnicity, child welfare history by age 4, and a dummy-coded variable for missing data on risk status. School poverty among the 8 indicators of risk status was replaced with neighborhood poverty at 1980. Home environment at ages 0-5 was included. Robust standard errors were used. IPW of being in the study sample was created, and was used as a sampling weight in the model to adjust for attrition. Sample sizes vary by measures.
3. Adjusted for 8 indicators of preprogram risk status, sex of child, race/ethnicity, child welfare history by age 4, and a dummy-coded variable for missing data on risk status. School poverty among the 8 indicators of risk status was replaced with neighborhood poverty at 1980. Home environment at ages 0-5 was included. Robust standard errors were used. IPW of being in the study sample was created, and was used as a sampling weight in the model to adjust for attrition. Sample sizes vary by measures.
4. Adjusted for 8 indicators of preprogram risk status, sex of child, race/ethnicity, child welfare history by age 4, Iowa Tests of Basic Skills word analysis scores at the end of kindergarten, and a dummy-coded variable for missing data on risk status. School poverty among the 8 indicators of risk status was replaced with neighborhood poverty at 1980. Home environment at ages 0-5 was included. Robust standard errors were used. IPW of being in the study sample was created, and was used as a sampling weight in the model to adjust for attrition. Sample sizes vary by measures.

Table S13. Main Effects of Selected Outcomes for Three Measures of CPC Participation and the Percentage Reduction in Effects Associated with Five Hypotheses of Mediation

| Adult outcome                               | Preschool                        |             | School-Age                       |             | Extended-1                       |             |
|---------------------------------------------|----------------------------------|-------------|----------------------------------|-------------|----------------------------------|-------------|
|                                             | Main effect                      | % Reduction | Main effect                      | % Reduction | Main effect                      | % Reduction |
| On time graduation, %                       | 9.6                              | 100         | 7.9                              | 25.5        | 12.1                             | 73.6        |
| High school completion, %                   | 7.6                              | 100         | --                               | --          | 6.6                              | 100         |
| SES $\geq$ 4, %                             | 7.1                              | 99          | --                               | --          | 6.9                              | 38.2        |
| Average annual income in 2007 dollars (log) | 786 (0.41)                       | 64.7        | --                               | --          | --                               | --          |
| Substance abuse (excluding alcohol), %      | -6.5                             | 59.8        | --                               | --          | --                               | --          |
| Any felony charge, %                        | -6.4                             | 100         | --                               | --          | --                               | --          |
| Strongest predictors of adult outcomes      | ITBS reading score, age 14       |             | School quality, ages 10 to 14    |             | ITBS cognitive composite, age 5  |             |
|                                             | Juvenile arrest                  |             | Juvenile arrest                  |             | Juvenile arrest                  |             |
|                                             | High school completion by age 21 |             | High school completion by age 21 |             | High school completion by age 21 |             |

*Note.* Five-Hypothesis Model included indicators for cognitive advantage, family support, social adjustment, motivational advantage and school support measures from ages 5 to 21 (see also Table S14). ITBS = Iowa Tests of Basic Skills, standard scores. Extended-1 = Extended intervention group with 4 to 6 years of services versus fewer years.

Table S14. Standardized Coefficients for Models in which CPC Program Participation Predicts Mediators and the Mediators Predict Selected

| Mediators                                | Direct effects of CPC participation |            |                   | Predictors of adult outcomes |                        |              |                             |                                     |                   |
|------------------------------------------|-------------------------------------|------------|-------------------|------------------------------|------------------------|--------------|-----------------------------|-------------------------------------|-------------------|
|                                          | Preschool                           | School-age | Extended interv-1 | On-time graduation           | High school completion | SES $\geq$ 4 | Average annual income (log) | Substance abuse (excluding alcohol) | Any felony charge |
| ITBS cognitive composite, age 5          | .276                                | NA         | NA                | .008                         | .005                   | .004         | X                           | X                                   | -.004             |
| Special education or retention by age 15 | -.120                               | -.104      | -.146             | -.420                        | -.210                  | -.188        | -.114                       | .124                                | .156              |
| ITBS reading score, age 14               | .150                                | .099       | .164              | .010                         | .006                   | .007         | .228                        | -.004                               | -.005             |
| High school completion by age 21         | .134                                | X          | .098              | --                           | .529                   | .468         | .342                        | -.256                               | -.283             |
| Social adjustment, ages 7-9              | .133                                | .091       | .165              | .041                         | .026                   | .032         | .192                        | -.016                               | -.023             |
| Trouble making behavior, ages 9-12       | -.078                               | X          | -.072             | -.156                        | -.082                  | -.142        | -.226                       | .121                                | .141              |
| Juvenile arrest                          | -.086                               | X          | X                 | -.370                        | -.236                  | -.324        | -.350                       | .377                                | .461              |
| Motivation, ages 5-6                     | .127                                | NA         | NA                | .145                         | .087                   | .110         | .137                        | -.060                               | -.060             |
| School commitment, ages 11-12            | .100                                | .085       | .133              | .103                         | .056                   | .099         | .166                        | -.069                               | -.078             |
| Child abuse and neglect, ages 4-12       | -.031                               | X          | -.040             | -.225                        | X                      | -.221        | -.092                       | .138                                | .179              |
| Parent involvement in school, ages 7-12  | .148                                | .235       | .318              | .093                         | .059                   | .053         | .137                        | -.042                               | -.046             |
| School mobility, ages 10-14              | -.118                               | -.123      | -.187             | -.172                        | -.084                  | -.092        | -.127                       | .088                                | .107              |
| School quality, ages 10-14               | .093                                | .101       | .144              | .267                         | .171                   | .167         | .097                        | -.115                               | -.118             |

*Note.* Summary of results for the models are reported in Table S13. Coefficients denote the change outcome (mediator or adult outcome) associated with a 1 standard deviation change in the predictor (CPC program or mediator) controlling for covariates and in the case of the adult outcomes, program participation and the other mediators. Mediators are indicators in the Five-Hypothesis Model (5HM) of Intervention Effects and include cognitive advantage, family support, social adjustment, school motivational advantage, and school support domains. Mediators were tested with program components and outcomes independently.

All listed standardized coefficients are significant at 0.01 level. X = not significant at the .05 level. NA = not applicable (mediator not measured after program participation).
